# Supplementary material for: Disparities in multiple sleep characteristics among non-Hispanic White and Hispanic/Latino adults by birthplace and language preference: cross-sectional results from the US National Health Interview Survey
Source: PubMed Central journal article supplement — BMJ Open. 2021 Sep 2;11(9):e047834. doi: 10.1136/bmjopen-2020-047834 (PMC8413971; doi:10.1136/bmjopen-2020-047834), 2021-09-02
Supplement: bmjopen-2020-047834supp001.pdf [file bmjopen-2020-047834supp001.pdf]

**Supplemental Figure 1. Flow Chart Diagram of Final Analytic Sample**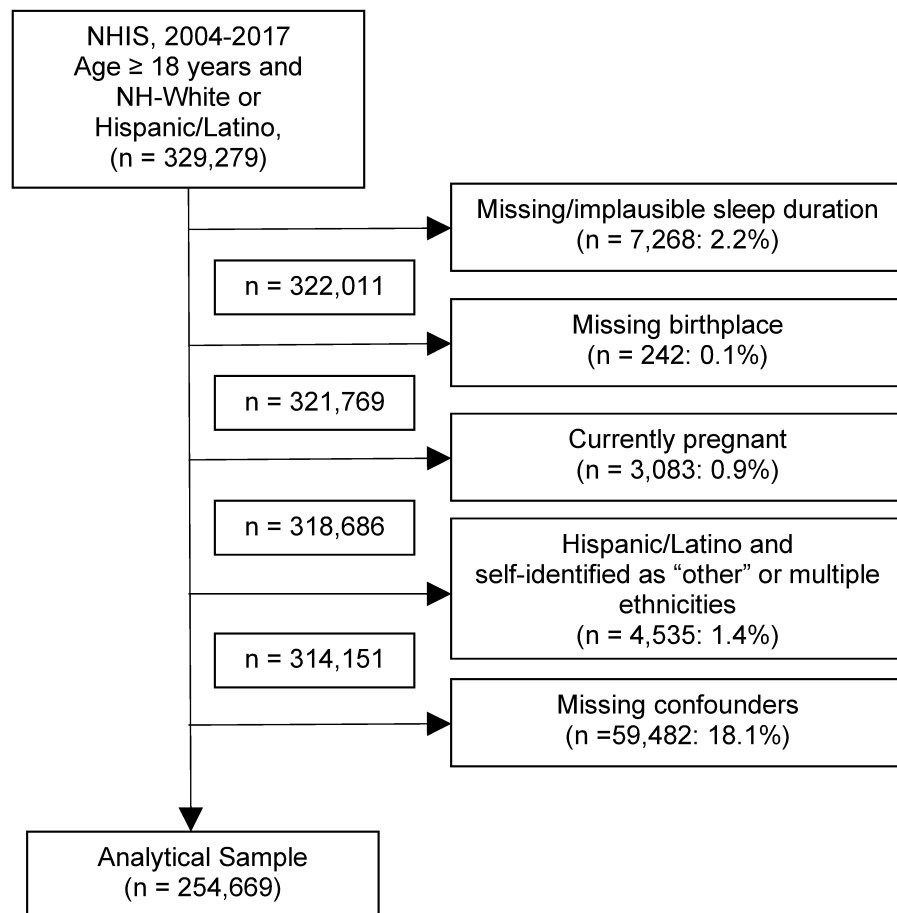

**Supplemental Figure 2. Fully-Adjusted Prevalence Ratios of Sleep (a) Duration and (b) Quality<sup>a</sup> Characteristics for Hispanic/Latino Heritage Groups compared to non-Hispanic Whites by Language Acculturation Status<sup>b</sup>: Results after False Discovery Rate Correction, National Health Interview Survey, 2004-2017 (N=245,812)**

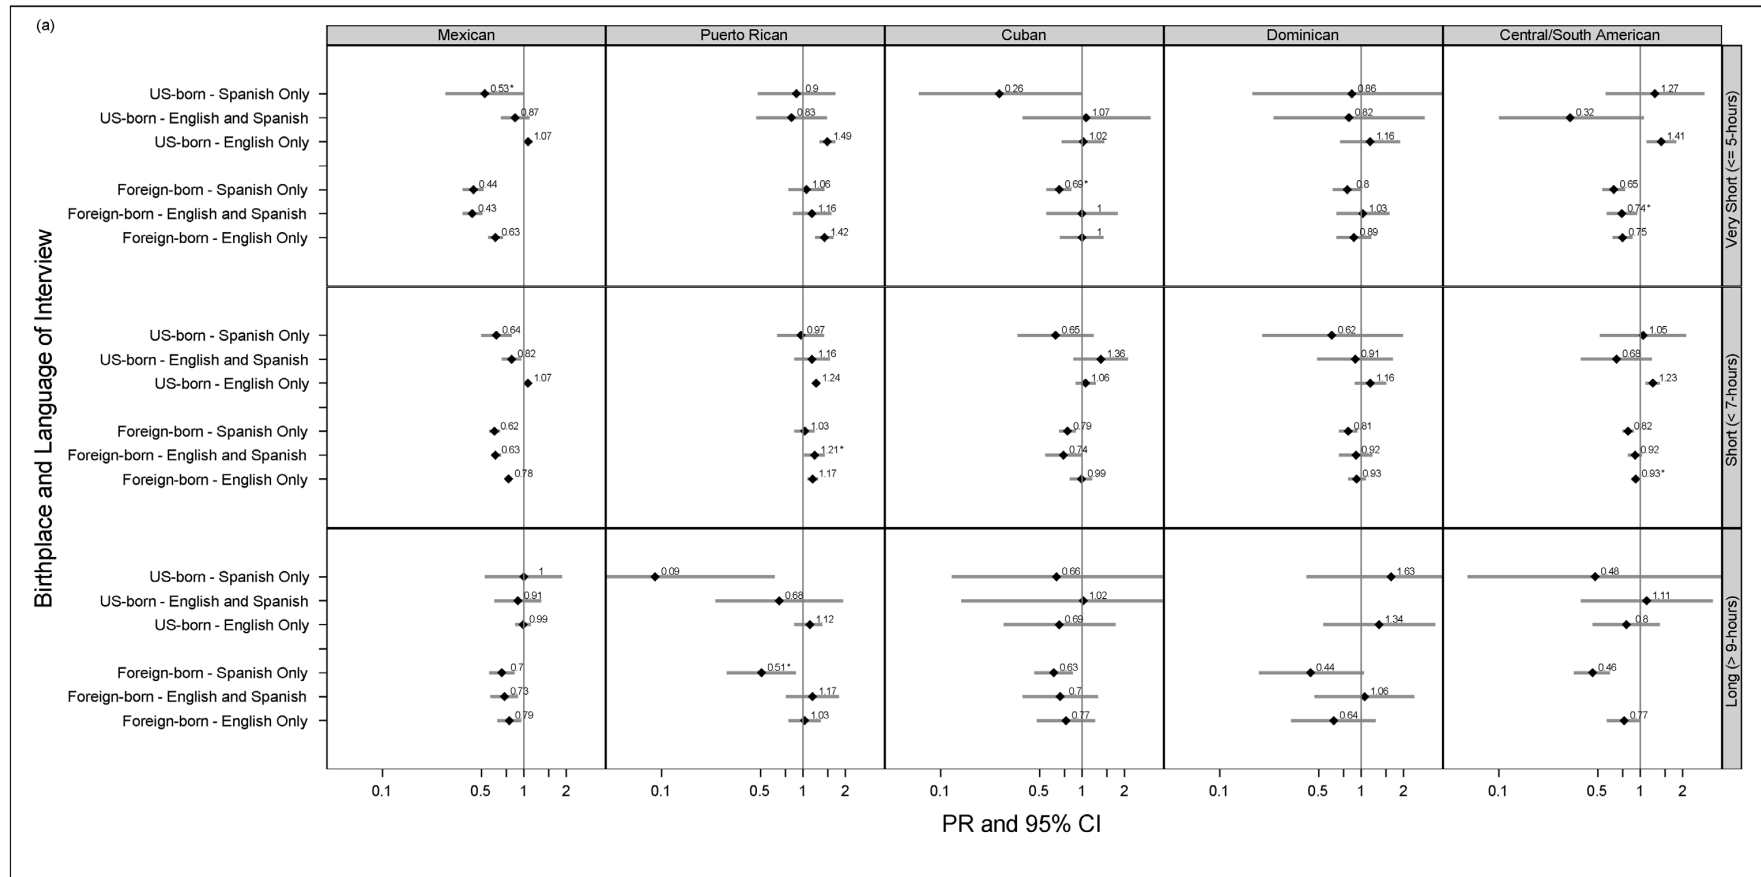

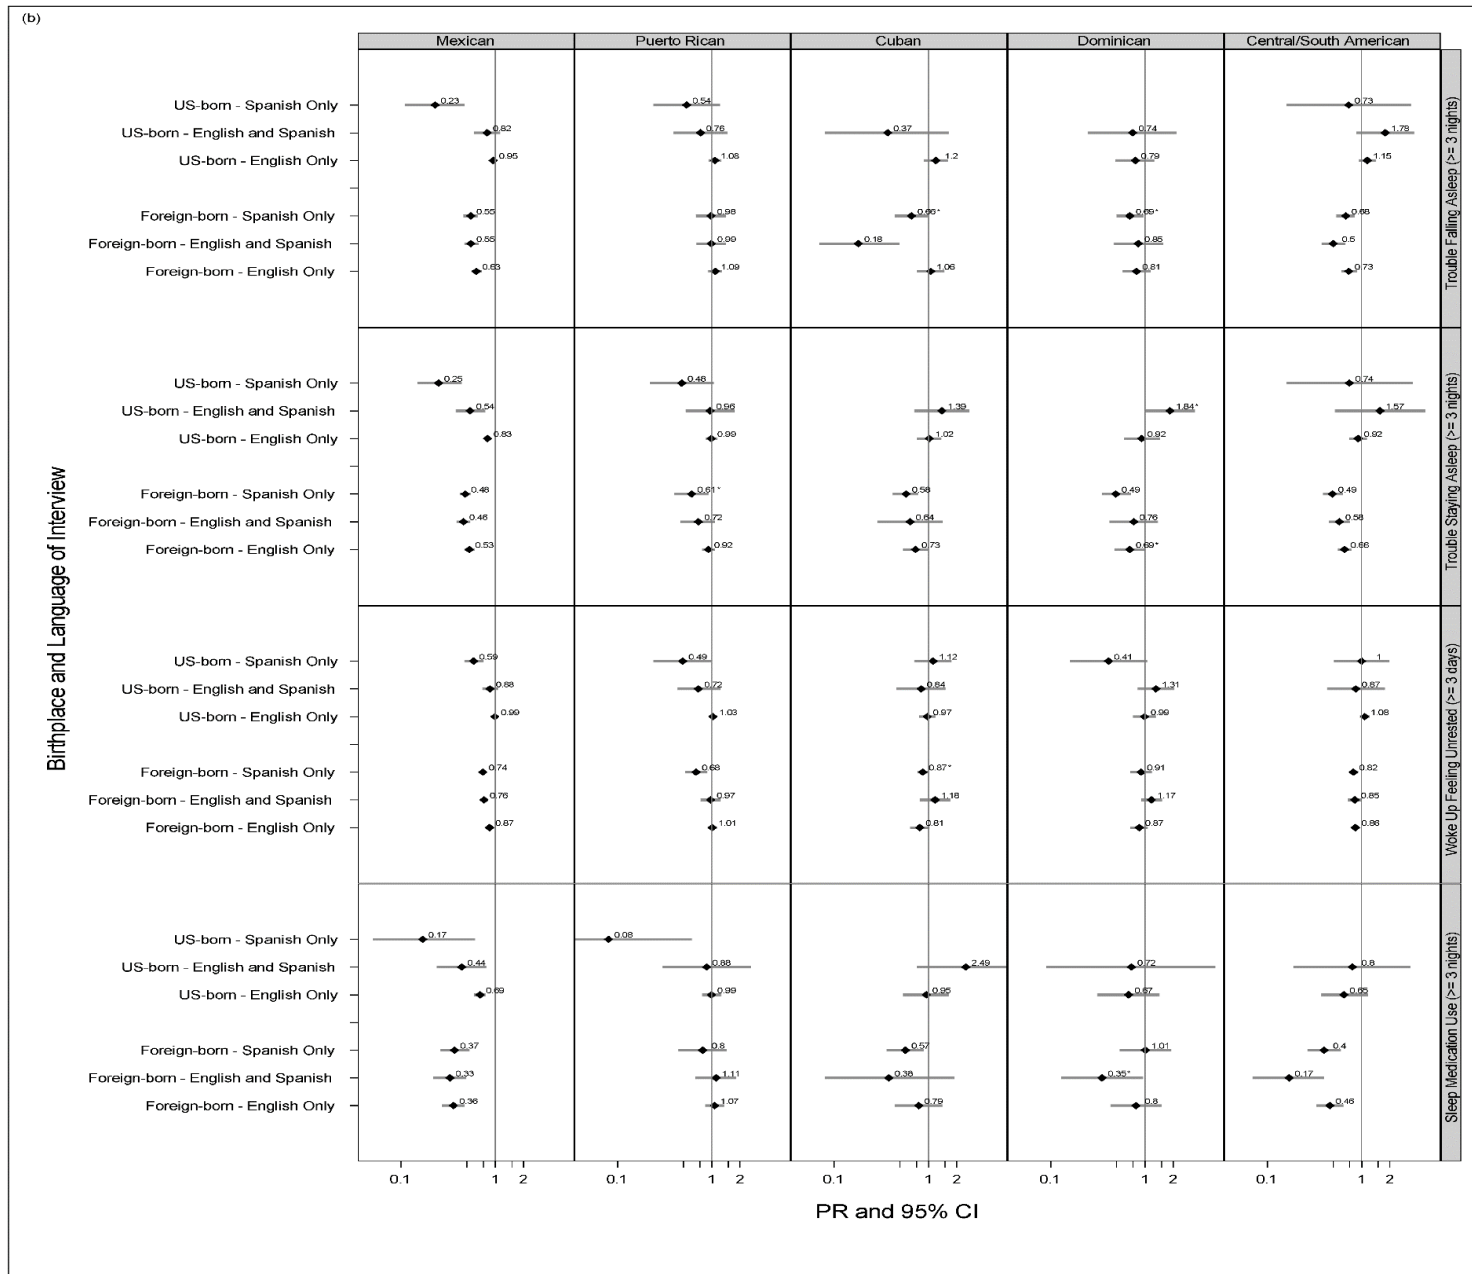

<sup>a</sup> Trouble falling asleep, trouble staying asleep, sleep medication use, and restorative sleep were measured during the survey years 2013-2017.

<sup>b</sup> Language acculturation categories include high (English only interview), medium (English and Spanish interview), and low (Spanish only interview).

Adjusted for age (18-30, 31-49, 50-64, 65+ years), sex/gender (male, female), annual household income (<\$35,000, \$35,000-\$74,999, \$75,000+), educational attainment (<high school, high school graduate, some college, ≥college), unemployed/not in the labor force (yes, no), occupational class (professional/management, support services, laborers), marital/cohabitating status (married/cohabitating, divorced/widowed, single), region of residence (Northeast, Midwest, South, West), alcohol consumption (never, former, current), serious psychological distress (Kessler-6 psychological distress scale score ≥13), "ideal" cardiovascular health (never smoking/quit >12 months prior to interview, BMI <25 kg/m<sup>2</sup>, meeting physical activity guidelines, and no prior diagnosis of dyslipidemia, hypertension, or diabetes/prediabetes), and cancer.

Note. All estimates are weighted for the survey's complex sampling design. Certain associations were not estimable due to small sample sizes and are, therefore, not provided (e.g., long sleep duration among Central/South Americans with medium acculturation compared to non-Hispanic Whites).

\* Results were statistically significant in original analyses but became statistically non-significant after applying false discovery rate p-values.

**Supplemental Table 1. Global Region of Birth among Foreign-born Non-Hispanic Whites, National Health Interview Survey, 2004-2017 (N=8,857)**

| <b>Region of Birth</b>                      | <b>n (%)</b> |
|---------------------------------------------|--------------|
| Mexico, Central American, Caribbean Islands | 238 (2.7)    |
| South America                               | 236 (2.7)    |
| Europe                                      | 4,670 (52.7) |
| Russia                                      | 838 (9.5)    |
| Africa                                      | 368 (4.2)    |
| Middle East                                 | 895 (10.1)   |
| Indian Subcontinent                         | 64 (0.7)     |
| Asia                                        | 177 (2.0)    |
| Southeast Asia                              | 117 (1.3)    |
| Elsewhere                                   | 1,254 (14.2) |

Note: Data are presented as absolute counts and age-standardized, weighted percentages.

**Supplemental Table 2. Fully-Adjusted Prevalence Ratios of Sleep Characteristics for Foreign-born non-Hispanic Whites and Hispanic/Latino Heritage Groups compared to U.S.-born non-Hispanic Whites: Results after False Discovery Rate Correction, National Health Interview Survey, 2004-2017 (N=254,669)**

| Group (n)                                           | Prevalence Ratio (95% Confidence Interval)             |                                   |                                 |                                                           |                                                           |                                                         |                                                         |
|-----------------------------------------------------|--------------------------------------------------------|-----------------------------------|---------------------------------|-----------------------------------------------------------|-----------------------------------------------------------|---------------------------------------------------------|---------------------------------------------------------|
|                                                     | Sleep Duration<br>(reference: recommended (7-9 hours)) |                                   |                                 | Sleep Quality in the Past Week                            |                                                           |                                                         |                                                         |
|                                                     | Very Short<br>(≤5-hours)<br>(n=21,227)                 | Short<br>(<7-hours)<br>(n=75,139) | Long<br>(>9-hours)<br>(n=9,190) | Trouble<br>Falling<br>Asleep<br>(≥3 nights)<br>(n=22,038) | Trouble<br>Staying<br>Asleep<br>(≥3 nights)<br>(n=30,013) | Non-<br>restorative<br>Sleep<br>(≥3 days)<br>(n=46,103) | Sleep<br>Medication<br>Use<br>(≥3 nights)<br>(n=11,097) |
| <b>U.S.-born Non-Hispanic White</b><br>(n=198,297)  | Ref                                                    | Ref                               | Ref                             | Ref                                                       | Ref                                                       | Ref                                                     | Ref                                                     |
| <b>Foreign-born Non-Hispanic White</b><br>(n=8,857) | 1.03<br>(0.93-1.13)                                    | 1.03<br>(0.99-1.08)               | 1.07<br>(0.92-1.24)             | 1.09<br>(0.99-1.19)                                       | <b>1.27</b><br>(1.17-1.37)                                | <b>1.06</b><br>(1.00-1.12)                              | <b>1.34</b><br>(1.16-1.55)                              |
| <b>Mexican</b>                                      |                                                        |                                   |                                 |                                                           |                                                           |                                                         |                                                         |
| <b>Overall</b><br>(n=30,100)                        | <b>0.76</b><br>(0.71-0.81)                             | <b>0.87</b><br>(0.85-0.90)        | <b>0.87</b><br>(0.79-0.96)      | <b>0.77</b><br>(0.72-0.82)                                | <b>0.65</b><br>(0.62-0.69)                                | <b>0.90</b><br>(0.87-0.94)                              | <b>0.52</b><br>(0.46-0.58)                              |
| <b>U.S.-born (yes)</b><br>(n=14,282)                | 1.04<br>(0.97-1.12)                                    | 1.04<br>(1.00-1.08)               | 0.98<br>(0.87-1.11)             | <b>0.92</b><br>(0.85-0.99)                                | <b>0.80</b><br>(0.74-0.85)                                | 0.97<br>(0.93-1.01)                                     | <b>0.66</b><br>(0.58-0.76)                              |
| <b>U.S.-born (no)</b><br>(n=15,818)                 | <b>0.52</b><br>(0.47-0.57)                             | <b>0.70</b><br>(0.67-0.73)        | <b>0.75</b><br>(0.66-0.85)      | <b>0.59</b><br>(0.54-0.65)                                | <b>0.50</b><br>(0.46-0.55)                                | <b>0.81</b><br>(0.77-0.85)                              | <b>0.36</b><br>(0.29-0.43)                              |
| <b>Puerto Rican</b>                                 |                                                        |                                   |                                 |                                                           |                                                           |                                                         |                                                         |
| <b>Overall</b><br>(n=5,077)                         | <b>1.39</b><br>(1.26-1.53)                             | <b>1.20</b><br>(1.14-1.25)        | 1.00<br>(0.84-1.20)             | 1.05<br>(0.95-1.17)                                       | 0.91<br>(0.83-1.00)                                       | 0.98<br>(0.92-1.05)                                     | 0.99<br>(0.85-1.15)                                     |
| <b>U.S.-born (yes)</b><br>(n=2,544)                 | <b>1.44</b><br>(1.27-1.64)                             | <b>1.23</b><br>(1.16-1.31)        | 1.08<br>(0.84-1.37)             | 1.05<br>(0.91-1.21)                                       | 0.97<br>(0.85-1.12)                                       | 1.00<br>(0.92-1.09)                                     | 0.96<br>(0.77-1.21)                                     |
| <b>U.S.-born (no)</b><br>(n=2,533)                  | <b>1.32</b><br>(1.16-1.51)                             | <b>1.15</b><br>(1.08-1.24)        | 0.94<br>(0.74-1.19)             | 1.06<br>(0.92-1.22)                                       | <b>0.84</b><br>(0.73-0.97)                                | 0.95<br>(0.86-1.05)                                     | 1.02<br>(0.83-1.25)                                     |
| <b>Cuban</b>                                        |                                                        |                                   |                                 |                                                           |                                                           |                                                         |                                                         |
| <b>Overall</b><br>(n=2,518)                         | <b>0.83</b><br>(0.70-0.99)                             | <b>0.89</b><br>(0.81-0.98)        | <b>0.69</b><br>(0.55-0.87)      | <b>0.78</b><br>(0.62-0.97)                                | <b>0.70</b><br>(0.58-0.83)                                | 0.90<br>(0.82-1.00)                                     | <b>0.68</b><br>(0.53-0.89)                              |
| <b>U.S.-born (yes)</b><br>(n=559)                   | 0.93<br>(0.66-1.29)                                    | 1.04<br>(0.89-1.21)               | 0.71<br>(0.34-1.47)             | 0.97<br>(0.72-1.31)                                       | 0.94<br>(0.70-1.26)                                       | 0.98<br>(0.82-1.17)                                     | 0.98<br>(0.57-1.69)                                     |
| <b>U.S.-born (no)</b><br>(n=1,959)                  | <b>0.81</b><br>(0.66-0.99)                             | <b>0.85</b><br>(0.76-0.95)        | <b>0.69</b><br>(0.54-0.88)      | <b>0.71</b><br>(0.53-0.95)                                | <b>0.63</b><br>(0.49-0.79)                                | <b>0.87</b><br>(0.78-0.98)                              | <b>0.61</b><br>(0.43-0.85)                              |
| <b>Dominican</b>                                    |                                                        |                                   |                                 |                                                           |                                                           |                                                         |                                                         |
| <b>Overall</b><br>(n=1,658)                         | 0.90<br>(0.76-1.08)                                    | 0.92<br>(0.83-1.01)               | 0.72<br>(0.49-1.05)             | <b>0.76</b><br>(0.62-0.92)                                | <b>0.67</b><br>(0.55-0.83)                                | 0.93<br>(0.82-1.05)                                     | 0.81<br>(0.54-1.20)                                     |
| <b>U.S.-born (yes)</b>                              | 1.09                                                   | 1.09                              | 1.15                            | 0.73                                                      | 0.97                                                      | 0.98                                                    | 0.64                                                    |

|                                     |                                   |                                   |                                   |                                   |                                   |                                   |                                   |
|-------------------------------------|-----------------------------------|-----------------------------------|-----------------------------------|-----------------------------------|-----------------------------------|-----------------------------------|-----------------------------------|
| (n=264)                             | (0.68-1.74)                       | (0.85-1.40)                       | (0.49-2.73)                       | (0.47-1.13)                       | (0.65-1.43)                       | (0.77-1.26)                       | (0.31-1.31)                       |
| <b>U.S.-born (no)</b><br>(n=1,394)  | 0.87<br>(0.73-1.03)               | <b>0.88</b><br><b>(0.79-0.98)</b> | <b>0.60</b><br><b>(0.38-0.93)</b> | <b>0.76</b><br><b>(0.62-0.95)</b> | <b>0.61</b><br><b>(0.48-0.78)</b> | 0.92<br>(0.79-1.07)               | 0.84<br>(0.54-1.30)               |
| <b>Central/South American</b>       |                                   |                                   |                                   |                                   |                                   |                                   |                                   |
| <b>Overall</b><br>(n=8,162)         | <b>0.78</b><br><b>(0.71-0.87)</b> | <b>0.93</b><br><b>(0.89-0.98)</b> | <b>0.68</b><br><b>(0.56-0.83)</b> | <b>0.76</b><br><b>(0.67-0.87)</b> | <b>0.65</b><br><b>(0.58-0.73)</b> | <b>0.89</b><br><b>(0.83-0.94)</b> | <b>0.42</b><br><b>(0.34-0.53)</b> |
| <b>U.S.-born (yes)</b><br>(n=1,113) | <b>1.30</b><br><b>(1.03-1.65)</b> | <b>1.18</b><br><b>(1.04-1.33)</b> | 0.82<br>(0.51-1.30)               | 1.21<br>(0.96-1.51)               | 0.98<br>(0.73-1.30)               | 1.05<br>(0.93-1.19)               | 0.64<br>(0.38-1.10)               |
| <b>U.S.-born (no)</b><br>(n=7,049)  | <b>0.72</b><br><b>(0.64-0.80)</b> | <b>0.89</b><br><b>(0.85-0.94)</b> | <b>0.66</b><br><b>(0.54-0.82)</b> | <b>0.68</b><br><b>(0.59-0.77)</b> | <b>0.59</b><br><b>(0.53-0.67)</b> | <b>0.85</b><br><b>(0.80-0.90)</b> | <b>0.39</b><br><b>(0.30-0.50)</b> |

Abbreviations: ref (reference)

Adjusted for age (18-30, 31-49, 50-64, 65+ years), sex/gender (male, female), annual household income (<\$35,000, \$35,000-\$74,999, \$75,000+), educational attainment (<high school, high school graduate, some college, ≥college), unemployed/not in the labor force (yes, no), occupational class (professional/management, support services, laborers), marital/cohabitating status (married/cohabitating, divorced/widowed, single), region of residence (Northeast, Midwest, South, West), alcohol consumption (never, former, current), serious psychological distress (Kessler-6 psychological distress scale score ≥13), "ideal" cardiovascular health (never smoking/quit >12 months prior to interview, BMI <25 kg/m<sup>2</sup>, meeting physical activity guidelines, and no prior diagnosis of dyslipidemia, hypertension, or diabetes/prediabetes), and cancer.

Note. All estimates are weighted for the survey's complex sampling design. Very short and short sleep are non-mutually exclusive sleep duration categories. Trouble falling asleep, trouble staying asleep, sleep medication use, and restorative sleep were measured during the survey years 2013-2017.

Italicized results indicate results that were statistically significant in original analyses but became statistically non-significant after applying false discovery rate p-values.

**Supplemental Table 3. Fully-Adjusted Prevalence Ratios of Sleep Characteristics for Hispanic/Latino Heritage Groups compared to Foreign-born non-Hispanic Whites: Results after False Discovery Rate Correction, National Health Interview Survey, 2004-2017 (N=56,372)**

| Group (n)                                    | Prevalence Ratio (95% Confidence Interval)             |                                   |                                   |                                                          |                                                          |                                                        |                                                        |
|----------------------------------------------|--------------------------------------------------------|-----------------------------------|-----------------------------------|----------------------------------------------------------|----------------------------------------------------------|--------------------------------------------------------|--------------------------------------------------------|
|                                              | Sleep Duration<br>(reference: recommended (7-9 hours)) |                                   |                                   | Sleep Quality in the Past Week                           |                                                          |                                                        |                                                        |
|                                              | Very Short<br>(≤5-hours)<br>(n=4,115)                  | Short<br>(<7-hours)<br>(n=14,048) | Long<br>(>9-hours)<br>(n=1,586)   | Trouble<br>Falling<br>Asleep<br>(≥3 nights)<br>(n=3,431) | Trouble<br>Staying<br>Asleep<br>(≥3 nights)<br>(n=3,520) | Non-<br>restorative<br>Sleep<br>(≥3 days)<br>(n=7,734) | Sleep<br>Medication<br>Use<br>(≥3 nights)<br>(n=1,073) |
| Foreign-born Non-Hispanic White<br>(n=8,857) | Ref                                                    | Ref                               | Ref                               | Ref                                                      | Ref                                                      | Ref                                                    | Ref                                                    |
| <b>Mexican</b>                               |                                                        |                                   |                                   |                                                          |                                                          |                                                        |                                                        |
| <b>Overall</b><br>(n=30,100)                 | 1.10<br>(0.96-1.26)                                    | <b>1.12</b><br><b>(1.05-1.18)</b> | 1.06<br>(0.86-1.31)               | 0.92<br>(0.81-1.05)                                      | <b>0.87</b><br><b>(0.78-0.97)</b>                        | 1.06<br>(0.99-1.14)                                    | 0.92<br>(0.73-1.14)                                    |
| <b>U.S.-born (yes)</b><br>(n=14,282)         | <b>1.17</b><br><b>(1.02-1.34)</b>                      | <b>1.19</b><br><b>(1.12-1.26)</b> | 1.04<br>(0.84-1.29)               | 1.00<br>(0.87-1.14)                                      | 0.97<br>(0.86-1.10)                                      | 1.07<br>(0.99-1.15)                                    | 0.98<br>(0.78-1.23)                                    |
| <b>U.S.-born (no)</b><br>(n=15,818)          | 0.89<br>(0.73-1.08)                                    | 0.98<br>(0.90-1.06)               | 1.05<br>(0.81-1.36)               | <b>0.78</b><br><b>(0.66-0.94)</b>                        | <b>0.72</b><br><b>(0.62-0.84)</b>                        | 1.02<br>(0.93-1.12)                                    | <b>0.68</b><br><b>(0.48-0.96)</b>                      |
| <b>Puerto Rican</b>                          |                                                        |                                   |                                   |                                                          |                                                          |                                                        |                                                        |
| <b>Overall</b><br>(n=5,077)                  | <b>1.75</b><br><b>(1.51-2.02)</b>                      | <b>1.34</b><br><b>(1.25-1.44)</b> | 1.13<br>(0.88-1.44)               | <b>1.19</b><br><b>(1.03-1.39)</b>                        | 1.14<br>(0.99-1.31)                                      | 1.06<br>(0.96-1.16)                                    | <b>1.33</b><br><b>(1.07-1.64)</b>                      |
| <b>U.S.-born (yes)</b><br>(n=2,544)          | <b>1.85</b><br><b>(1.54-2.22)</b>                      | <b>1.39</b><br><b>(1.27-1.51)</b> | 1.33<br>(0.95-1.85)               | 1.20<br>(0.99-1.46)                                      | <b>1.22</b><br><b>(1.02-1.46)</b>                        | 1.06<br>(0.95-1.18)                                    | <b>1.32</b><br><b>(1.01-1.73)</b>                      |
| <b>U.S.-born (no)</b><br>(n=2,533)           | <b>1.58</b><br><b>(1.32-1.90)</b>                      | <b>1.27</b><br><b>(1.16-1.39)</b> | 1.02<br>(0.77-1.35)               | <b>1.22</b><br><b>(1.01-1.46)</b>                        | 1.09<br>(0.91-1.30)                                      | 1.06<br>(0.94-1.20)                                    | <b>1.41</b><br><b>(1.09-1.83)</b>                      |
| <b>Cuban</b>                                 |                                                        |                                   |                                   |                                                          |                                                          |                                                        |                                                        |
| <b>Overall</b><br>(n=2,518)                  | 0.97<br>(0.76-1.22)                                    | 0.98<br>(0.88-1.10)               | <b>0.69</b><br><b>(0.49-0.97)</b> | 0.92<br>(0.70-1.20)                                      | 0.93<br>(0.76-1.15)                                      | 1.03<br>(0.90-1.18)                                    | 1.09<br>(0.77-1.55)                                    |
| <b>U.S.-born (yes)</b><br>(n=559)            | 1.03<br>(0.69-1.53)                                    | 1.15<br>(0.96-1.37)               | 0.83<br>(0.39-1.75)               | 1.14<br>(0.79-1.65)                                      | 1.17<br>(0.84-1.65)                                      | 1.05<br>(0.85-1.29)                                    | 1.63<br>(0.91-2.93)                                    |
| <b>U.S.-born (no)</b><br>(n=1,959)           | 0.94<br>(0.72-1.22)                                    | 0.92<br>(0.81-1.05)               | <b>0.66</b><br><b>(0.46-0.94)</b> | 0.82<br>(0.59-1.14)                                      | 0.85<br>(0.65-1.10)                                      | 1.04<br>(0.89-1.21)                                    | 0.96<br>(0.63-1.45)                                    |
| <b>Dominican</b>                             |                                                        |                                   |                                   |                                                          |                                                          |                                                        |                                                        |
| <b>Overall</b><br>(n=1,658)                  | 1.12<br>(0.89-1.43)                                    | 1.02<br>(0.90-1.16)               | 0.91<br>(0.57-1.45)               | 0.88<br>(0.68-1.13)                                      | 0.94<br>(0.72-1.23)                                      | 1.00<br>(0.87-1.15)                                    | 1.03<br>(0.67-1.59)                                    |
| <b>U.S.-born (yes)</b><br>(n=264)            | 1.40<br>(0.82-2.41)                                    | 1.24<br>(0.97-1.60)               | 1.80<br>(0.68-4.79)               | 0.82<br>(0.51-1.31)                                      | 1.25<br>(0.81-1.93)                                      | 1.01<br>(0.78-1.32)                                    | 0.97<br>(0.42-2.20)                                    |
| <b>U.S.-born (no)</b><br>(n=1,394)           | 1.06<br>(0.84-1.34)                                    | 0.96<br>(0.84-1.10)               | 0.73<br>(0.45-1.20)               | 0.88<br>(0.68-1.16)                                      | 0.87<br>(0.65-1.18)                                      | 0.99<br>(0.84-1.18)                                    | 1.02<br>(0.64-1.63)                                    |



| Central/South American              |                                   |                                   |                     |                     |                                   |                     |                                   |
|-------------------------------------|-----------------------------------|-----------------------------------|---------------------|---------------------|-----------------------------------|---------------------|-----------------------------------|
| <b>Overall</b><br>(n=8,162)         | 1.00<br>(0.86-1.17)               | <b>1.10</b><br><b>(1.02-1.17)</b> | 0.76<br>(0.57-1.02) | 0.94<br>(0.78-1.13) | 0.89<br>(0.76-1.04)               | 1.02<br>(0.95-1.11) | <b>0.69</b><br><b>(0.51-0.91)</b> |
| <b>U.S.-born (yes)</b><br>(n=1,113) | <b>1.42</b><br><b>(1.06-1.92)</b> | <b>1.30</b><br><b>(1.13-1.49)</b> | 1.02<br>(0.59-1.75) | 1.27<br>(0.96-1.67) | 1.14<br>(0.86-1.52)               | 1.08<br>(0.94-1.25) | 0.95<br>(0.56-1.62)               |
| <b>U.S.-born (no)</b><br>(n=7,049)  | 0.92<br>(0.78-1.08)               | 1.05<br>(0.98-1.13)               | 0.77<br>(0.56-1.05) | 0.84<br>(0.69-1.02) | <b>0.84</b><br><b>(0.72-0.99)</b> | 1.00<br>(0.92-1.09) | <b>0.64</b><br><b>(0.47-0.88)</b> |

Abbreviations: ref (reference)

Adjusted for age (18-30, 31-49, 50-64, 65+ years), sex/gender (male, female), annual household income (<\$35,000, \$35,000-\$74,999, \$75,000+), educational attainment (<high school, high school graduate, some college, ≥college), unemployed/not in the labor force (yes, no), occupational class (professional/management, support services, laborers), marital/cohabitating status (married/cohabitating, divorced/widowed, single), region of residence (Northeast, Midwest, South, West), alcohol consumption (never, former, current), serious psychological distress (Kessler-6 psychological distress scale score ≥13), "ideal" cardiovascular health (never smoking/quit >12 months prior to interview, BMI <25 kg/m<sup>2</sup>, meeting physical activity guidelines, and no prior diagnosis of dyslipidemia, hypertension, or diabetes/prediabetes), and cancer.

Note. All estimates are weighted for the survey's complex sampling design. Very short and short sleep are non-mutually exclusive sleep duration categories. Trouble falling asleep, trouble staying asleep, sleep medication use, and restorative sleep were measured during the survey years 2013-2017.

Italicized results indicate results that were statistically significant in original analyses but became statistically non-significant after applying false discovery rate p-values.

**Supplemental Table 4. Fully-Adjusted Prevalence Ratios of Sleep Characteristics for Hispanic/Latino Heritage Groups compared to non-Hispanic Whites, National Health Interview Survey, 2004-2017 (N=254,669)**

| Heritage Group Compared to non-Hispanic Whites, Overall (n=207,154) | Prevalence Ratio (95% Confidence Interval)             |                                     |                                     |                                                           |                                                           |                                                         |                                                         |
|---------------------------------------------------------------------|--------------------------------------------------------|-------------------------------------|-------------------------------------|-----------------------------------------------------------|-----------------------------------------------------------|---------------------------------------------------------|---------------------------------------------------------|
|                                                                     | Sleep Duration<br>(reference: recommended (7-9 hours)) |                                     |                                     | Sleep Quality <sup>a</sup>                                |                                                           |                                                         |                                                         |
|                                                                     | Very Short<br>(≤5-hours)<br>(n=21,227)                 | Short<br>(<7-hours)<br>(n=75,139)   | Long<br>(>9-hours)<br>(n=9,190)     | Trouble<br>Falling<br>Asleep<br>(≥3 nights)<br>(n=22,038) | Trouble<br>Staying<br>Asleep<br>(≥3 nights)<br>(n=30,013) | Non-<br>restorative<br>Sleep<br>(≥3 days)<br>(n=46,103) | Sleep<br>Medication<br>Use<br>(≥3 nights)<br>(n=11,097) |
| <b>Mexican</b><br>(n=30,100 Mexican)                                | <b>0.89</b><br>( <b>0.82-0.95</b> )                    | 0.95<br>(0.92-0.98)                 | 0.94<br>(0.84-1.04)                 | <b>0.85</b><br>( <b>0.79-0.91</b> )                       | <b>0.75</b><br>( <b>0.71-0.80</b> )                       | <b>0.95</b><br>( <b>0.91-0.99</b> )                     | <b>0.62</b><br>( <b>0.54-0.70</b> )                     |
| <b>Puerto Rican</b><br>(n=5,077)                                    | <b>1.41</b><br>( <b>1.27-1.57</b> )                    | <b>1.21</b><br>( <b>1.16-1.27</b> ) | 1.05<br>(0.87-1.27)                 | 1.10<br>(0.99-1.22)                                       | 1.02<br>(0.92-1.12)                                       | 1.01<br>(0.94-1.08)                                     | 1.10<br>(0.94-1.30)                                     |
| <b>Cuban</b><br>(n=2,518)                                           | 0.90<br>(0.75-1.07)                                    | 0.94<br>(0.86-1.04)                 | <b>0.75</b><br>( <b>0.58-0.97</b> ) | 0.88<br>(0.71-1.09)                                       | 0.88<br>(0.74-1.05)                                       | 0.96<br>(0.87-1.07)                                     | 0.93<br>(0.70-1.23)                                     |
| <b>Dominican</b><br>(n=1,658)                                       | 0.95<br>(0.78-1.16)                                    | 0.96<br>(0.86-1.06)                 | 0.79<br>(0.53-1.18)                 | 0.82<br>(0.66-1.02)                                       | 0.84<br>(0.68-1.04)                                       | 0.98<br>(0.87-1.11)                                     | 1.04<br>(0.69-1.58)                                     |
| <b>Central/South American</b><br>(n=8,162)                          | 0.89<br>(0.78-1.01)                                    | 1.01<br>(0.95-1.07)                 | <b>0.75</b><br>( <b>0.60-0.94</b> ) | 0.88<br>(0.75-1.03)                                       | <b>0.83</b><br>( <b>0.73-0.95</b> )                       | 0.95<br>(0.88-1.02)                                     | <b>0.57</b><br>( <b>0.44-0.73</b> )                     |

Adjusted for age (18-30, 31-49, 50-64, 65+ years), sex (male, female), annual household income (<\$35,000, \$35,000-\$74,999, \$75,000+), educational attainment (<high school, high school graduate, some college, ≥college), unemployed/not in the labor force (yes, no), occupational class (professional/management, support services, laborers), marital/cohabitating status (married/cohabitating, divorced/widowed, single), region of residence (Northeast, Midwest, South, West), alcohol consumption (lifetime abstainer, former, current), serious psychological distress (Kessler-6 psychological distress scale score ≥13), and "ideal" cardiovascular health (never smoking/quit >12 months prior to interview, BMI <25 kg/m<sup>2</sup>, meeting physical activity guidelines, and no prior diagnosis of dyslipidemia, hypertension, or diabetes/prediabetes), cancer, and US nativity status/years lived in the US (US-born, 15+ years in the US, <15 years in the US).

Note. All estimates are weighted for the survey's complex sampling design. Trouble falling asleep, trouble staying asleep, awakening feeling rested, and sleep medication were measured during the survey years 2013-2017.

Supplemental Table 5. Fully-Adjusted Prevalence Ratios of Sleep Characteristics for (1) foreign-born non-Hispanic Whites and (2) Hispanic/Latino Heritage Groups compared to US-born non-Hispanic Whites, Stratified by Sex/Gender, National Health Interview Survey, 2004-2017 (N=254,669)

| Group (n)                                    | Prevalence Ratio (95% Confidence Interval)             |                                     |                                     |                                     |                                     |                                     |                                                        |                                     |                                                        |                                     |                                                     |                                     |                                                      |                                     |
|----------------------------------------------|--------------------------------------------------------|-------------------------------------|-------------------------------------|-------------------------------------|-------------------------------------|-------------------------------------|--------------------------------------------------------|-------------------------------------|--------------------------------------------------------|-------------------------------------|-----------------------------------------------------|-------------------------------------|------------------------------------------------------|-------------------------------------|
|                                              | Sleep Duration<br>(reference: recommended (7-9 hours)) |                                     |                                     |                                     |                                     |                                     | Sleep Quality in the Past Week                         |                                     |                                                        |                                     |                                                     |                                     |                                                      |                                     |
|                                              | Very Short<br>(≤5-hours)<br>(n=21,227)                 |                                     | Short<br>(<7-hours)<br>(n=75,139)   |                                     | Long<br>(>9-hours)<br>(n=9,190)     |                                     | Trouble Falling<br>Asleep<br>(≥3 nights)<br>(n=22,038) |                                     | Trouble Staying<br>Asleep<br>(≥3 nights)<br>(n=30,013) |                                     | Non-restorative<br>Sleep<br>(≥3 days)<br>(n=46,103) |                                     | Sleep Medication<br>Use<br>(≥3 nights)<br>(n=11,097) |                                     |
| Sex/Gender                                   | Men                                                    | Women                               | Men                                 | Women                               | Men                                 | Women                               | Men                                                    | Women                               | Men                                                    | Women                               | Men                                                 | Women                               | Men                                                  | Women                               |
| U.S.-born Non-Hispanic White<br>(n=198,297)  | ref                                                    | ref                                 | ref                                 | ref                                 | ref                                 | ref                                 | ref                                                    | ref                                 | ref                                                    | ref                                 | ref                                                 | ref                                 | ref                                                  | ref                                 |
| Foreign-born Non-Hispanic White<br>(n=8,857) | 1.12<br>(0.98-1.30)                                    | 0.94<br>(0.83-1.06)                 | 1.07<br>(1.00-1.13)                 | 1.00<br>(0.95-1.06)                 | 1.18<br>(0.94-1.47)                 | 1.00<br>(0.82-1.21)                 | 1.08<br>(0.92-1.27)                                    | 1.09<br>(0.97-1.21)                 | <b>1.31</b><br>( <b>1.16-1.49</b> )                    | <b>1.22</b><br>( <b>1.11-1.35</b> ) | <b>1.11</b><br>( <b>1.02-1.21</b> )                 | 1.01<br>(0.95-1.08)                 | <b>1.44</b><br>( <b>1.12-1.85</b> )                  | <b>1.28</b><br>( <b>1.07-1.52</b> ) |
| <b>Mexican</b>                               |                                                        |                                     |                                     |                                     |                                     |                                     |                                                        |                                     |                                                        |                                     |                                                     |                                     |                                                      |                                     |
| <b>Overall (n=30,100)</b>                    | <b>0.70</b><br>( <b>0.63-0.77</b> )                    | <b>0.83</b><br>( <b>0.76-0.91</b> ) | <b>0.83</b><br>( <b>0.79-0.86</b> ) | <b>0.94</b><br>( <b>0.90-0.97</b> ) | 0.96<br>(0.84-1.10)                 | <b>0.77</b><br>( <b>0.68-0.87</b> ) | <b>0.77</b><br>( <b>0.73-0.82</b> )                    | <b>0.80</b><br>( <b>0.74-0.86</b> ) | <b>0.66</b><br>( <b>0.62-0.70</b> )                    | <b>0.68</b><br>( <b>0.63-0.73</b> ) | <b>0.91</b><br>( <b>0.87-0.94</b> )                 | <b>0.91</b><br>( <b>0.87-0.95</b> ) | <b>0.52</b><br>( <b>0.46-0.59</b> )                  | <b>0.48</b><br>( <b>0.41-0.56</b> ) |
| U.S.-born (yes)<br>(n=14,282)                | 1.02<br>(0.91-1.14)                                    | 1.05<br>(0.96-1.15)                 | 1.01<br>(0.96-1.07)                 | <b>1.07</b><br>( <b>1.03-1.12</b> ) | 1.09<br>(0.91-1.31)                 | 0.88<br>(0.75-1.03)                 | <b>0.92</b><br>( <b>0.85-0.99</b> )                    | 0.92<br>(0.84-1.00)                 | <b>0.80</b><br>( <b>0.74-0.86</b> )                    | <b>0.77</b><br>( <b>0.71-0.85</b> ) | 0.97<br>(0.93-1.01)                                 | 0.95<br>(0.90-1.00)                 | <b>0.66</b><br>( <b>0.58-0.76</b> )                  | <b>0.59</b><br>( <b>0.50-0.70</b> ) |
| U.S.-born (no)<br>(n=15,818)                 | <b>0.47</b><br>( <b>0.40-0.54</b> )                    | <b>0.60</b><br>( <b>0.52-0.69</b> ) | <b>0.66</b><br>( <b>0.62-0.70</b> ) | <b>0.77</b><br>( <b>0.71-0.82</b> ) | <b>0.83</b><br>( <b>0.70-0.99</b> ) | <b>0.65</b><br>( <b>0.54-0.78</b> ) | <b>0.60</b><br>( <b>0.55-0.66</b> )                    | <b>0.64</b><br>( <b>0.58-0.71</b> ) | <b>0.51</b><br>( <b>0.46-0.55</b> )                    | <b>0.55</b><br>( <b>0.49-0.62</b> ) | <b>0.82</b><br>( <b>0.77-0.86</b> )                 | <b>0.85</b><br>( <b>0.80-0.90</b> ) | <b>0.36</b><br>( <b>0.30-0.44</b> )                  | <b>0.34</b><br>( <b>0.27-0.42</b> ) |
| <b>Puerto Rican</b>                          |                                                        |                                     |                                     |                                     |                                     |                                     |                                                        |                                     |                                                        |                                     |                                                     |                                     |                                                      |                                     |
| <b>Overall (n=5,077)</b>                     | <b>1.31</b><br>( <b>1.13-1.53</b> )                    | <b>1.45</b><br>( <b>1.29-1.63</b> ) | <b>1.19</b><br>( <b>1.11-1.28</b> ) | <b>1.21</b><br>( <b>1.14-1.28</b> ) | 1.05<br>(0.82-1.34)                 | 0.95<br>(0.74-1.21)                 | 1.05<br>(0.94-1.16)                                    | 1.08<br>(0.96-1.22)                 | 0.91<br>(0.83-1.00)                                    | <b>0.87</b><br>( <b>0.78-0.97</b> ) | 0.98<br>(0.91-1.05)                                 | 1.04<br>(0.97-1.12)                 | 0.98<br>(0.84-1.15)                                  | 1.02<br>(0.84-1.23)                 |
| U.S.-born (yes)<br>(n=2,544)                 | <b>1.33</b><br>( <b>1.08-1.63</b> )                    | <b>1.53</b><br>( <b>1.30-1.81</b> ) | <b>1.21</b><br>( <b>1.11-1.33</b> ) | <b>1.24</b><br>( <b>1.15-1.35</b> ) | 1.26<br>(0.89-1.77)                 | 0.94<br>(0.66-1.33)                 | 1.04<br>(0.90-1.21)                                    | 1.14<br>(0.98-1.33)                 | 0.97<br>(0.85-1.11)                                    | 0.91<br>(0.78-1.05)                 | 1.00<br>(0.92-1.09)                                 | <b>1.10</b><br>( <b>1.01-1.20</b> ) | 0.96<br>(0.76-1.19)                                  | 0.97<br>(0.73-1.30)                 |
| U.S.-born (no)<br>(n=2,533)                  | <b>1.29</b><br>( <b>1.03-1.61</b> )                    | <b>1.36</b><br>( <b>1.17-1.58</b> ) | <b>1.15</b><br>( <b>1.04-1.27</b> ) | <b>1.16</b><br>( <b>1.06-1.26</b> ) | 0.89<br>(0.63-1.26)                 | 0.96<br>(0.72-1.28)                 | 1.05<br>(0.91-1.21)                                    | 1.01<br>(0.86-1.18)                 | 0.84<br>(0.73-0.97)                                    | <b>0.82</b><br>( <b>0.70-0.97</b> ) | 0.95<br>(0.86-1.04)                                 | 0.96<br>(0.85-1.08)                 | 1.01<br>(0.83-1.24)                                  | 1.08<br>(0.86-1.35)                 |
| <b>Cuban</b>                                 |                                                        |                                     |                                     |                                     |                                     |                                     |                                                        |                                     |                                                        |                                     |                                                     |                                     |                                                      |                                     |
| <b>Overall (n=2,518)</b>                     | <b>0.75</b><br>( <b>0.59-0.96</b> )                    | 0.94<br>(0.75-1.18)                 | <b>0.84</b><br>( <b>0.74-0.95</b> ) | 0.97<br>(0.87-1.09)                 | <b>0.73</b><br>( <b>0.54-0.99</b> ) | <b>0.63</b><br>( <b>0.42-0.93</b> ) | <b>0.76</b><br>( <b>0.61-0.94</b> )                    | 0.78<br>(0.60-1.01)                 | <b>0.68</b><br>( <b>0.57-0.81</b> )                    | <b>0.72</b><br>( <b>0.57-0.91</b> ) | <b>0.89</b><br>( <b>0.81-0.99</b> )                 | 0.98<br>(0.85-1.14)                 | <b>0.66</b><br>( <b>0.51-0.87</b> )                  | 0.77<br>(0.55-1.06)                 |
| U.S.-born Cuban (yes)<br>(n=559)             | 0.78<br>(0.44-1.39)                                    | 1.08<br>(0.74-1.58)                 | 1.01<br>(0.81-1.25)                 | 1.08<br>(0.89-1.31)                 | 0.49<br>(0.18-1.29)                 | 0.95<br>(0.39-2.31)                 | 0.95<br>(0.70-1.28)                                    | 0.96<br>(0.66-1.39)                 | 0.92<br>(0.69-1.23)                                    | 0.83<br>(0.53-1.31)                 | 0.96<br>(0.80-1.16)                                 | 1.07<br>(0.86-1.34)                 | 0.95<br>(0.54-1.66)                                  | 1.37<br>(0.78-2.42)                 |
| U.S.-born Cuban (no)<br>(n=1,959)            | 0.75<br>(0.56-1.00)                                    | 0.90<br>(0.69-1.18)                 | <b>0.78</b><br>( <b>0.67-0.91</b> ) | 0.94<br>(0.82-1.07)                 | 0.78<br>(0.57-1.05)                 | <b>0.55</b><br>( <b>0.35-0.87</b> ) | <b>0.69</b><br>( <b>0.52-0.92</b> )                    | <b>0.71</b><br>( <b>0.52-0.98</b> ) | <b>0.61</b><br>( <b>0.48-0.78</b> )                    | <b>0.68</b><br>( <b>0.50-0.94</b> ) | <b>0.87</b><br>( <b>0.77-0.97</b> )                 | 0.95<br>(0.80-1.13)                 | <b>0.59</b><br>( <b>0.42-0.83</b> )                  | <b>0.60</b><br>( <b>0.40-0.89</b> ) |
| <b>Dominican</b>                             |                                                        |                                     |                                     |                                     |                                     |                                     |                                                        |                                     |                                                        |                                     |                                                     |                                     |                                                      |                                     |
| <b>Overall (n=1,658)</b>                     | 0.82<br>(0.60-1.11)                                    | 0.96<br>(0.79-1.16)                 | 0.83<br>(0.71-0.97)                 | 0.98<br>(0.88-1.10)                 | 1.05<br>(0.68-1.61)                 | 0.49<br>(0.24-1.00)                 | <b>0.77</b><br>( <b>0.63-0.94</b> )                    | 0.83<br>(0.66-1.03)                 | <b>0.68</b><br>( <b>0.56-0.84</b> )                    | <b>0.77</b><br>( <b>0.61-0.97</b> ) | 0.94<br>(0.83-1.06)                                 | 0.96<br>(0.84-1.09)                 | 0.83<br>(0.55-1.23)                                  | 0.93<br>(0.60-1.45)                 |
| U.S.-born (yes)                              | 1.13<br>(0.60-2.11)                                    | 1.02<br>(0.58-1.79)                 | 0.86<br>(0.60-1.23)                 | 1.32<br>(0.98-1.77)                 | 0.96<br>(0.30-3.07)                 | 1.35<br>(0.48-3.80)                 | 0.73<br>(0.48-1.12)                                    | 0.62<br>(0.36-1.07)                 | 0.97<br>(0.65-1.44)                                    | 0.91<br>(0.53-1.57)                 | 0.99<br>(0.78-1.26)                                 | 0.93<br>(0.68-1.29)                 | 0.64<br>(0.31-1.30)                                  | 0.57<br>(0.23-1.43)                 |

|                                     |                                   |                                   |                                   |                                   |                                   |                                   |                                   |                                   |                                   |                                   |                                   |                                   |                                   |                                   |
|-------------------------------------|-----------------------------------|-----------------------------------|-----------------------------------|-----------------------------------|-----------------------------------|-----------------------------------|-----------------------------------|-----------------------------------|-----------------------------------|-----------------------------------|-----------------------------------|-----------------------------------|-----------------------------------|-----------------------------------|
| (n=264)                             |                                   |                                   |                                   |                                   |                                   |                                   |                                   |                                   |                                   |                                   |                                   |                                   |                                   |                                   |
| <b>U.S.-born (no)</b><br>(n=1,394)  | 0.74<br>(0.52-1.04)               | 0.95<br>(0.78-1.15)               | 0.82<br>(0.69-0.97)               | 0.92<br>(0.81-1.04)               | 1.08<br>(0.63-1.85)               | <b>0.29</b><br><b>(0.15-0.53)</b> | <b>0.78</b><br><b>(0.63-0.97)</b> | 0.88<br>(0.69-1.12)               | <b>0.62</b><br><b>(0.49-0.80)</b> | <b>0.74</b><br><b>(0.57-0.97)</b> | 0.92<br>(0.79-1.08)               | 0.96<br>(0.83-1.13)               | 0.86<br>(0.55-1.34)               | 1.00<br>(0.61-1.63)               |
| <b>Central/South American</b>       |                                   |                                   |                                   |                                   |                                   |                                   |                                   |                                   |                                   |                                   |                                   |                                   |                                   |                                   |
| <b>Overall (n=8,162)</b>            | <b>0.71</b><br><b>(0.61-0.83)</b> | <b>0.87</b><br><b>(0.76-0.99)</b> | <b>0.93</b><br><b>(0.87-0.99)</b> | 0.94<br>(0.88-1.01)               | <b>0.66</b><br><b>(0.48-0.91)</b> | <b>0.70</b><br><b>(0.56-0.89)</b> | <b>0.78</b><br><b>(0.68-0.88)</b> | <b>0.83</b><br><b>(0.71-0.97)</b> | <b>0.65</b><br><b>(0.58-0.73)</b> | <b>0.73</b><br><b>(0.63-0.86)</b> | <b>0.89</b><br><b>(0.84-0.95)</b> | 0.96<br>(0.89-1.04)               | <b>0.43</b><br><b>(0.34-0.54)</b> | <b>0.46</b><br><b>(0.35-0.61)</b> |
| <b>U.S.-born (yes)</b><br>(n=1,113) | 1.31<br>(0.92-1.87)               | 1.31<br>(0.96-1.77)               | 1.25<br>(1.08-1.45)               | 1.10<br>(0.92-1.30)               | 0.64<br>(0.35-1.16)               | 0.95<br>(0.52-1.74)               | 1.21<br>(0.96-1.53)               | <b>1.40</b><br><b>(1.06-1.86)</b> | 0.97<br>(0.73-1.30)               | 1.13<br>(0.80-1.61)               | 1.05<br>(0.92-1.20)               | 1.13<br>(0.97-1.32)               | 0.64<br>(0.38-1.10)               | <b>0.47</b><br><b>(0.24-0.94)</b> |
| <b>U.S.-born (no)</b> (n=7,049)     | <b>0.64</b><br><b>(0.54-0.76)</b> | <b>0.80</b><br><b>(0.70-0.93)</b> | <b>0.88</b><br><b>(0.82-0.94)</b> | <b>0.92</b><br><b>(0.85-0.98)</b> | <b>0.66</b><br><b>(0.47-0.94)</b> | <b>0.67</b><br><b>(0.52-0.87)</b> | <b>0.69</b><br><b>(0.60-0.78)</b> | <b>0.71</b><br><b>(0.61-0.83)</b> | <b>0.60</b><br><b>(0.53-0.68)</b> | <b>0.66</b><br><b>(0.57-0.77)</b> | <b>0.85</b><br><b>(0.80-0.91)</b> | <b>0.92</b><br><b>(0.85-0.99)</b> | <b>0.40</b><br><b>(0.31-0.51)</b> | <b>0.46</b><br><b>(0.34-0.62)</b> |

Abbreviations: ref (reference)

Adjusted for age (18-30, 31-49, 50-64, 65+ years), annual household income (<\$35,000, \$35,000-\$74,999, \$75,000+), educational attainment (<high school, high school graduate, some college, ≥college), unemployed/not in the labor force (yes, no), occupational class (professional/management, support services, laborers), marital/cohabitating status (married/cohabitating, divorced/widowed, single), region of residence (Northeast, Midwest, South, West), heavy alcohol consumption (≥2 drinks/day for women and ≥3 drinks/day for men), serious psychological distress (Kessler-6 psychological distress scale score ≥13), "ideal" cardiovascular health (never smoking/quit >12 months prior to interview, BMI <25 kg/m<sup>2</sup>, meeting physical activity guidelines, and no prior diagnosis of dyslipidemia, hypertension, or diabetes/prediabetes), and cancer.

Note. All estimates are weighted for the survey's complex sampling design. Trouble falling asleep, trouble staying asleep, sleep medication use, and restorative sleep were measured during the survey years 2013-2017.

Supplemental Table 6. Fully-Adjusted Prevalence Ratios of Sleep Characteristics for (1) foreign-born non-Hispanic Whites and (2) Hispanic/Latino Heritage Groups compared to US-born non-Hispanic Whites, Stratified by Age Group, National Health Interview Survey, 2004-2017 (N=254,669)

| Group (n)                                          | Prevalence Ratio (95% Confidence Interval)             |                                                |                                                |                                                |                                                |                                                |                                 |                                                |                                                |                                                        |                                                |                                                |                                                        |                                                |                                                |                                                     |                                                |                                                |                                                      |                                                |                                                |
|----------------------------------------------------|--------------------------------------------------------|------------------------------------------------|------------------------------------------------|------------------------------------------------|------------------------------------------------|------------------------------------------------|---------------------------------|------------------------------------------------|------------------------------------------------|--------------------------------------------------------|------------------------------------------------|------------------------------------------------|--------------------------------------------------------|------------------------------------------------|------------------------------------------------|-----------------------------------------------------|------------------------------------------------|------------------------------------------------|------------------------------------------------------|------------------------------------------------|------------------------------------------------|
|                                                    | Sleep Duration<br>(reference: recommended (7-9 hours)) |                                                |                                                |                                                |                                                |                                                |                                 |                                                |                                                | Sleep Quality in the Past Week                         |                                                |                                                |                                                        |                                                |                                                |                                                     |                                                |                                                |                                                      |                                                |                                                |
|                                                    | Very Short<br>(≤5-hours)<br>(n=21,227)                 |                                                |                                                | Short<br>(≤7-hours)<br>(n=75,139)              |                                                |                                                | Long<br>(>9-hours)<br>(n=9,190) |                                                |                                                | Trouble Falling<br>Asleep<br>(≥3 nights)<br>(n=22,038) |                                                |                                                | Trouble Staying<br>Asleep<br>(≥3 nights)<br>(n=30,013) |                                                |                                                | Non-restorative<br>Sleep<br>(≥3 days)<br>(n=46,103) |                                                |                                                | Sleep Medication<br>Use<br>(≥3 nights)<br>(n=11,097) |                                                |                                                |
| Age (years)<br>Group                               | 18-30                                                  | 31-49                                          | 50+                                            | 18-30                                          | 31-49                                          | 50+                                            | 18-30                           | 31-49                                          | 50+                                            | 18-30                                                  | 31-49                                          | 50+                                            | 18-30                                                  | 31-49                                          | 50+                                            | 18-30                                               | 31-49                                          | 50+                                            | 18-30                                                | 31-49                                          | 50+                                            |
| U.S.-born<br>Non-Hispanic<br>White<br>(n=198,297)  | Ref                                                    | Ref                                            | Ref                                            | Ref                                            | Ref                                            | Ref                                            | Ref                             | Ref                                            | Ref                                            | Ref                                                    | Ref                                            | Ref                                            | Ref                                                    | Ref                                            | Ref                                            | Ref                                                 | Ref                                            | Ref                                            | Ref                                                  | Ref                                            | Ref                                            |
| Foreign-born<br>Non-Hispanic<br>White<br>(n=8,857) | 0.93<br>(0.71-<br>1.23)                                | <b>1.33</b><br>( <b>1.13-</b><br><b>1.56</b> ) | 0.89<br>(0.80-<br>1.00)                        | 1.08<br>(0.95-<br>1.22)                        | <b>1.13</b><br>( <b>1.05-</b><br><b>1.21</b> ) | 0.96<br>(0.91-<br>1.01)                        | 1.24<br>(0.80-<br>1.92)         | 1.12<br>(0.79-<br>1.59)                        | 0.96<br>(0.82-<br>1.13)                        | 0.98<br>(0.74-<br>1.31)                                | <b>1.24</b><br>( <b>1.06-</b><br><b>1.44</b> ) | 1.04<br>(0.92-<br>1.17)                        | 1.11<br>(0.79-<br>1.56)                                | <b>1.44</b><br>( <b>1.24-</b><br><b>1.68</b> ) | <b>1.20</b><br>( <b>1.10-</b><br><b>1.31</b> ) | 1.02<br>(0.89-<br>1.16)                             | <b>1.15</b><br>( <b>1.07-</b><br><b>1.25</b> ) | 1.00<br>(0.92-<br>1.08)                        | 1.64<br>(0.95-<br>2.85)                              | <b>1.64</b><br>( <b>1.21-</b><br><b>2.22</b> ) | <b>1.22</b><br>( <b>1.03-</b><br><b>1.44</b> ) |
| Mexican                                            |                                                        |                                                |                                                |                                                |                                                |                                                |                                 |                                                |                                                |                                                        |                                                |                                                |                                                        |                                                |                                                |                                                     |                                                |                                                |                                                      |                                                |                                                |
| Overall<br>(n=30,100)                              | <b>0.78</b><br>( <b>0.69-</b><br><b>0.89</b> )         | <b>0.69</b><br>( <b>0.62-</b><br><b>0.76</b> ) | 0.98<br>(0.87-<br>1.10)                        | <b>0.88</b><br>( <b>0.83-</b><br><b>0.93</b> ) | <b>0.87</b><br>( <b>0.83-</b><br><b>0.90</b> ) | 0.96<br>(0.91-<br>1.02)                        | 0.96<br>(0.80-<br>1.15)         | <b>0.72</b><br>( <b>0.61-</b><br><b>0.87</b> ) | <b>0.86</b><br>( <b>0.75-</b><br><b>0.98</b> ) | <b>0.81</b><br>( <b>0.76-</b><br><b>0.86</b> )         | <b>0.66</b><br>( <b>0.60-</b><br><b>0.73</b> ) | 0.92<br>(0.83-<br>1.01)                        | <b>0.65</b><br>( <b>0.61-</b><br><b>0.69</b> )         | <b>0.58</b><br>( <b>0.53-</b><br><b>0.64</b> ) | <b>0.71</b><br>( <b>0.64-</b><br><b>0.78</b> ) | <b>0.95</b><br>( <b>0.92-</b><br><b>0.99</b> )      | <b>0.88</b><br>( <b>0.84-</b><br><b>0.92</b> ) | 0.93<br>(0.87-<br>1.00)                        | <b>0.50</b><br>( <b>0.44-</b><br><b>0.56</b> )       | <b>0.41</b><br>( <b>0.33-</b><br><b>0.51</b> ) | <b>0.61</b><br>( <b>0.52-</b><br><b>0.72</b> ) |
| U.S.-born<br>(yes)<br>(n=14,282)                   | 1.03<br>(0.90-<br>1.18)                                | 1.03<br>(0.91-<br>1.15)                        | <b>1.14</b><br>( <b>1.01-</b><br><b>1.27</b> ) | 1.00<br>(0.93-<br>1.06)                        | <b>1.09</b><br>( <b>1.03-</b><br><b>1.15</b> ) | 1.06<br>(0.99-<br>1.13)                        | 1.04<br>(0.85-<br>1.26)         | 0.85<br>(0.67-<br>1.09)                        | 0.96<br>(0.81-<br>1.13)                        | 0.96<br>(0.89-<br>1.03)                                | <b>0.81</b><br>( <b>0.73-</b><br><b>0.91</b> ) | 1.01<br>(0.90-<br>1.15)                        | <b>0.77</b><br>( <b>0.71-</b><br><b>0.82</b> )         | <b>0.73</b><br>( <b>0.65-</b><br><b>0.82</b> ) | <b>0.84</b><br>( <b>0.75-</b><br><b>0.95</b> ) | 1.02<br>(0.98-<br>1.06)                             | 0.96<br>(0.91-<br>1.03)                        | 1.00<br>(0.92-<br>1.09)                        | <b>0.61</b><br>( <b>0.53-</b><br><b>0.70</b> )       | <b>0.64</b><br>( <b>0.51-</b><br><b>0.80</b> ) | <b>0.64</b><br>( <b>0.54-</b><br><b>0.76</b> ) |
| U.S.-born (no)<br>(n=15,818)                       | <b>0.43</b><br>( <b>0.34-</b><br><b>0.54</b> )         | <b>0.48</b><br>( <b>0.41-</b><br><b>0.55</b> ) | <b>0.82</b><br>( <b>0.68-</b><br><b>0.98</b> ) | <b>0.67</b><br>( <b>0.61-</b><br><b>0.74</b> ) | <b>0.69</b><br>( <b>0.65-</b><br><b>0.74</b> ) | <b>0.86</b><br>( <b>0.79-</b><br><b>0.93</b> ) | 0.81<br>(0.62-<br>1.06)         | <b>0.65</b><br>( <b>0.51-</b><br><b>0.82</b> ) | <b>0.76</b><br>( <b>0.63-</b><br><b>0.92</b> ) | <b>0.63</b><br>( <b>0.58-</b><br><b>0.69</b> )         | <b>0.54</b><br>( <b>0.46-</b><br><b>0.62</b> ) | <b>0.80</b><br>( <b>0.69-</b><br><b>0.93</b> ) | <b>0.51</b><br>( <b>0.47-</b><br><b>0.56</b> )         | <b>0.46</b><br>( <b>0.40-</b><br><b>0.52</b> ) | <b>0.57</b><br>( <b>0.50-</b><br><b>0.65</b> ) | <b>0.86</b><br>( <b>0.82-</b><br><b>0.91</b> )      | <b>0.79</b><br>( <b>0.74-</b><br><b>0.85</b> ) | <b>0.85</b><br>( <b>0.77-</b><br><b>0.94</b> ) | <b>0.36</b><br>( <b>0.29-</b><br><b>0.43</b> )       | <b>0.22</b><br>( <b>0.15-</b><br><b>0.32</b> ) | <b>0.57</b><br>( <b>0.44-</b><br><b>0.75</b> ) |
| Puerto Rican                                       |                                                        |                                                |                                                |                                                |                                                |                                                |                                 |                                                |                                                |                                                        |                                                |                                                |                                                        |                                                |                                                |                                                     |                                                |                                                |                                                      |                                                |                                                |
| Overall<br>(n=5,077)                               | <b>1.47</b><br>( <b>1.17-</b><br><b>1.83</b> )         | <b>1.30</b><br>( <b>1.12-</b><br><b>1.51</b> ) | <b>1.56</b><br>( <b>1.36-</b><br><b>1.78</b> ) | <b>1.26</b><br>( <b>1.13-</b><br><b>1.39</b> ) | <b>1.15</b><br>( <b>1.07-</b><br><b>1.24</b> ) | <b>1.27</b><br>( <b>1.18-</b><br><b>1.36</b> ) | 1.28<br>(0.94-<br>1.75)         | 0.88<br>(0.64-<br>1.20)                        | 0.88<br>(0.69-<br>1.14)                        | <b>1.12</b><br>( <b>1.01-</b><br><b>1.23</b> )         | 0.93<br>(0.78-<br>1.11)                        | <b>1.35</b><br>( <b>1.18-</b><br><b>1.56</b> ) | 0.92<br>(0.84-<br>1.02)                                | 0.92<br>(0.77-<br>1.09)                        | 0.92<br>(0.80-<br>1.07)                        | 1.04<br>(0.97-<br>1.10)                             | 0.97<br>(0.87-<br>1.07)                        | 1.04<br>(0.93-<br>1.17)                        | 0.98<br>(0.84-<br>1.15)                              | 0.83<br>(0.62-<br>1.12)                        | 1.15<br>(0.93-<br>1.40)                        |
| U.S.-born<br>(yes)<br>(n=2,544)                    | <b>1.53</b><br>( <b>1.19-</b><br><b>1.96</b> )         | <b>1.47</b><br>( <b>1.24-</b><br><b>1.74</b> ) | <b>1.55</b><br>( <b>1.17-</b><br><b>2.06</b> ) | <b>1.26</b><br>( <b>1.12-</b><br><b>1.42</b> ) | <b>1.25</b><br>( <b>1.15-</b><br><b>1.36</b> ) | <b>1.28</b><br>( <b>1.11-</b><br><b>1.48</b> ) | 1.36<br>(0.97-<br>1.91)         | 1.00<br>(0.66-<br>1.54)                        | 0.64<br>(0.35-<br>1.19)                        | 1.14<br>(0.99-<br>1.31)                                | 0.93<br>(0.75-<br>1.14)                        | <b>1.49</b><br>( <b>1.20-</b><br><b>1.86</b> ) | 0.98<br>(0.85-<br>1.12)                                | 1.02<br>(0.82-<br>1.25)                        | 1.01<br>(0.79-<br>1.28)                        | 1.08<br>(0.99-<br>1.18)                             | 0.99<br>(0.87-<br>1.12)                        | 1.11<br>(0.94-<br>1.31)                        | 0.93<br>(0.74-<br>1.17)                              | 0.79<br>(0.52-<br>1.19)                        | 1.25<br>(0.92-<br>1.69)                        |
| U.S.-born (no)<br>(n=2,533)                        | 1.27<br>(0.86-<br>1.87)                                | 1.08<br>(0.85-<br>1.38)                        | <b>1.56</b><br>( <b>1.34-</b><br><b>1.81</b> ) | <b>1.23</b><br>( <b>1.01-</b><br><b>1.51</b> ) | 1.01<br>(0.90-<br>1.14)                        | <b>1.26</b><br>( <b>1.16-</b><br><b>1.37</b> ) | 1.03<br>(0.53-<br>2.02)         | 0.75<br>(0.47-<br>1.18)                        | 0.96<br>(0.74-<br>1.25)                        | 1.09<br>(0.94-<br>1.25)                                | 0.95<br>(0.73-<br>1.22)                        | <b>1.27</b><br>( <b>1.06-</b><br><b>1.51</b> ) | <b>0.86</b><br>( <b>0.75-</b><br><b>0.99</b> )         | 0.77<br>(0.58-<br>1.02)                        | 0.87<br>(0.73-<br>1.03)                        | 0.98<br>(0.88-<br>1.08)                             | 0.94<br>(0.80-<br>1.10)                        | 1.00<br>(0.87-<br>1.14)                        | 1.04<br>(0.85-<br>1.27)                              | 0.90<br>(0.60-<br>1.35)                        | 1.08<br>(0.85-<br>1.37)                        |
| Cuban                                              |                                                        |                                                |                                                |                                                |                                                |                                                |                                 |                                                |                                                |                                                        |                                                |                                                |                                                        |                                                |                                                |                                                     |                                                |                                                |                                                      |                                                |                                                |
| Overall<br>(n=2,518)                               | 0.69<br>(0.40-<br>1.17)                                | <b>0.66</b><br>( <b>0.50-</b><br><b>0.86</b> ) | 1.08<br>(0.87-<br>1.34)                        | <b>0.75</b><br>( <b>0.59-</b><br><b>0.95</b> ) | <b>0.79</b><br>( <b>0.67-</b><br><b>0.93</b> ) | 1.06<br>(0.96-<br>1.18)                        | 0.64<br>(0.32-<br>1.26)         | 0.69<br>(0.42-<br>1.14)                        | <b>0.71</b><br>( <b>0.55-</b><br><b>0.93</b> ) | <b>0.78</b><br>( <b>0.63-</b><br><b>0.97</b> )         | 0.72<br>(0.52-<br>1.00)                        | 1.00<br>(0.79-<br>1.26)                        | <b>0.70</b><br>( <b>0.59-</b><br><b>0.84</b> )         | <b>0.73</b><br>( <b>0.56-</b><br><b>0.94</b> ) | <b>0.73</b><br>( <b>0.58-</b><br><b>0.91</b> ) | 0.91<br>(0.83-<br>1.01)                             | <b>0.81</b><br>( <b>0.70-</b><br><b>0.94</b> ) | 0.98<br>(0.84-<br>1.14)                        | <b>0.69</b><br>( <b>0.53-</b><br><b>0.90</b> )       | 0.66<br>(0.43-<br>1.04)                        | 0.76<br>(0.56-<br>1.04)                        |

|                                                            |                                   |                                   |                     |                                   |                                   |                     |                     |                                   |                                   |                                   |                                   |                                   |                                   |                                   |                                   |                                   |                                   |                     |                                   |                                   |                                   |
|------------------------------------------------------------|-----------------------------------|-----------------------------------|---------------------|-----------------------------------|-----------------------------------|---------------------|---------------------|-----------------------------------|-----------------------------------|-----------------------------------|-----------------------------------|-----------------------------------|-----------------------------------|-----------------------------------|-----------------------------------|-----------------------------------|-----------------------------------|---------------------|-----------------------------------|-----------------------------------|-----------------------------------|
| <b>U.S.-born Cuban (yes)</b><br>(n=559)                    | 0.81<br>(0.47-1.42)               | 0.83<br>(0.49-1.41)               | 1.65<br>(0.93-2.94) | 0.98<br>(0.76-1.26)               | 1.11<br>(0.91-1.35)               | 1.04<br>(0.69-1.57) | 0.93<br>(0.39-2.23) | 0.45<br>(0.14-1.41)               | 0.21<br>(0.03-1.53)               | 1.05<br>(0.78-1.41)               | 1.11<br>(0.72-1.71)               | 1.54<br>(0.85-2.78)               | 0.91<br>(0.68-1.22)               | 1.02<br>(0.68-1.53)               | 1.04<br>(0.62-1.75)               | 1.05<br>(0.87-1.26)               | 0.94<br>(0.72-1.24)               | 0.99<br>(0.61-1.63) | 0.91<br>(0.52-1.60)               | 1.53<br>(0.83-2.80)               | 0.63<br>(0.26-1.49)               |
| <b>U.S.-born Cuban (no)</b><br>(n=1,959)                   | 0.59<br>(0.24-1.43)               | <b>0.61</b><br><b>(0.44-0.84)</b> | 1.03<br>(0.81-1.31) | <b>0.48</b><br><b>(0.31-0.75)</b> | <b>0.67</b><br><b>(0.53-0.83)</b> | 1.06<br>(0.95-1.18) | 0.32<br>(0.08-1.34) | 0.75<br>(0.42-1.34)               | <b>0.74</b><br><b>(0.56-0.96)</b> | <b>0.70</b><br><b>(0.53-0.93)</b> | <b>0.57</b><br><b>(0.35-0.95)</b> | 0.94<br>(0.74-1.20)               | <b>0.64</b><br><b>(0.50-0.81)</b> | <b>0.61</b><br><b>(0.41-0.90)</b> | <b>0.69</b><br><b>(0.54-0.89)</b> | <b>0.87</b><br><b>(0.78-0.97)</b> | <b>0.76</b><br><b>(0.64-0.89)</b> | 0.98<br>(0.83-1.16) | <b>0.62</b><br><b>(0.44-0.88)</b> | <b>0.30</b><br><b>(0.13-0.66)</b> | 0.77<br>(0.56-1.07)               |
| <b>Dominican</b>                                           |                                   |                                   |                     |                                   |                                   |                     |                     |                                   |                                   |                                   |                                   |                                   |                                   |                                   |                                   |                                   |                                   |                     |                                   |                                   |                                   |
| <b>Overall</b><br>(n=1,658)                                | <b>0.64</b><br><b>(0.41-0.99)</b> | 0.90<br>(0.68-1.19)               | 1.18<br>(0.95-1.46) | 0.81<br>(0.62-1.05)               | 0.94<br>(0.82-1.08)               | 1.02<br>(0.89-1.17) | 1.32<br>(0.73-2.36) | 0.48<br>(0.22-1.03)               | <b>0.42</b><br><b>(0.21-0.84)</b> | <b>0.80</b><br><b>(0.66-0.97)</b> | 0.69<br>(0.47-1.01)               | 0.90<br>(0.68-1.18)               | <b>0.68</b><br><b>(0.55-0.83)</b> | <b>0.51</b><br><b>(0.33-0.77)</b> | <b>0.71</b><br><b>(0.53-0.96)</b> | 0.98<br>(0.86-1.11)               | <b>0.79</b><br><b>(0.65-0.97)</b> | 1.12<br>(0.94-1.34) | 0.79<br>(0.53-1.18)               | <b>0.37</b><br><b>(0.20-0.69)</b> | 1.31<br>(0.82-2.07)               |
| <b>U.S.-born (yes)</b><br>(n=264)                          | 0.63<br>(0.31-1.30)               | <b>2.17</b><br><b>(1.33-3.55)</b> | 1.65<br>(0.41-6.68) | 0.87<br>(0.58-1.31)               | <b>1.62</b><br><b>(1.30-2.02)</b> | 0.98<br>(0.43-2.20) | 1.32<br>(0.52-3.33) | 2.50<br>(0.76-8.25)               | NE                                | 0.78<br>(0.50-1.21)               | 0.88<br>(0.44-1.76)               | 0.82<br>(0.12-5.75)               | 0.85<br>(0.56-1.28)               | 1.05<br>(0.55-2.02)               | 0.46<br>(0.07-3.02)               | 1.06<br>(0.82-1.36)               | 1.05<br>(0.77-1.42)               | 1.60<br>(0.70-3.67) | 0.50<br>(0.24-1.02)               | 1.26<br>(0.52-3.02)               | 0.69<br>(0.08-5.75)               |
| <b>U.S.-born (no)</b><br>(n=1,394)                         | 0.63<br>(0.37-1.08)               | 0.76<br>(0.55-1.04)               | 1.16<br>(0.94-1.44) | 0.75<br>(0.55-1.03)               | <b>0.84</b><br><b>(0.72-0.99)</b> | 1.02<br>(0.89-1.17) | 1.31<br>(0.64-2.68) | 0.33<br>(0.12-0.87)               | <b>0.44</b><br><b>(0.22-0.87)</b> | <b>0.80</b><br><b>(0.65-0.99)</b> | <b>0.66</b><br><b>(0.44-0.97)</b> | 0.90<br>(0.69-1.18)               | <b>0.63</b><br><b>(0.50-0.81)</b> | <b>0.41</b><br><b>(0.26-0.64)</b> | <b>0.72</b><br><b>(0.54-0.96)</b> | 0.96<br>(0.82-1.12)               | <b>0.75</b><br><b>(0.59-0.94)</b> | 1.11<br>(0.91-1.35) | 0.87<br>(0.56-1.35)               | <b>0.20</b><br><b>(0.09-0.47)</b> | 1.33<br>(0.84-2.12)               |
| <b>Central/South American</b>                              |                                   |                                   |                     |                                   |                                   |                     |                     |                                   |                                   |                                   |                                   |                                   |                                   |                                   |                                   |                                   |                                   |                     |                                   |                                   |                                   |
| <b>Overall</b><br>(n=8,162)                                | 0.90<br>(0.72-1.12)               | <b>0.72</b><br><b>(0.62-0.84)</b> | 0.92<br>(0.78-1.09) | 0.97<br>(0.87-1.08)               | <b>0.92</b><br><b>(0.86-0.99)</b> | 0.99<br>(0.91-1.07) | 0.90<br>(0.63-1.27) | <b>0.63</b><br><b>(0.45-0.87)</b> | <b>0.51</b><br><b>(0.36-0.72)</b> | <b>0.81</b><br><b>(0.71-0.92)</b> | <b>0.70</b><br><b>(0.58-0.85)</b> | 0.85<br>(0.71-1.02)               | <b>0.65</b><br><b>(0.58-0.73)</b> | <b>0.55</b><br><b>(0.46-0.66)</b> | <b>0.66</b><br><b>(0.55-0.79)</b> | <b>0.93</b><br><b>(0.88-0.99)</b> | <b>0.85</b><br><b>(0.79-0.93)</b> | 0.91<br>(0.81-1.02) | <b>0.41</b><br><b>(0.33-0.52)</b> | <b>0.33</b><br><b>(0.21-0.51)</b> | <b>0.50</b><br><b>(0.38-0.67)</b> |
| <b>U.S.-born Central/South American (yes)</b><br>(n=1,113) | 1.31<br>(0.94-1.82)               | <b>1.52</b><br><b>(1.07-2.16)</b> | 0.98<br>(0.43-2.25) | <b>1.19</b><br><b>(1.02-1.40)</b> | <b>1.23</b><br><b>(1.04-1.45)</b> | 1.02<br>(0.65-1.58) | 0.82<br>(0.48-1.40) | 0.96<br>(0.34-2.74)               | 0.36<br>(0.08-1.54)               | 1.26<br>(1.01-1.55)               | 1.28<br>(0.90-1.83)               | <b>1.66</b><br><b>(1.01-2.73)</b> | 0.87<br>(0.65-1.15)               | 0.73<br>(0.53-1.03)               | 0.93<br>(0.53-1.63)               | 1.10<br>(0.97-1.25)               | 1.02<br>(0.84-1.23)               | 0.80<br>(0.46-1.41) | <b>0.52</b><br><b>(0.30-0.89)</b> | <b>0.23</b><br><b>(0.11-0.49)</b> | 1.41<br>(0.67-2.95)               |
| <b>U.S.-born Central/South American (no)</b><br>(n=7,049)  | <b>0.73</b><br><b>(0.56-0.96)</b> | <b>0.65</b><br><b>(0.55-0.77)</b> | 0.92<br>(0.77-1.09) | <b>0.86</b><br><b>(0.76-0.98)</b> | <b>0.89</b><br><b>(0.83-0.96)</b> | 0.99<br>(0.91-1.07) | 0.93<br>(0.61-1.41) | <b>0.61</b><br><b>(0.44-0.85)</b> | <b>0.51</b><br><b>(0.36-0.73)</b> | <b>0.72</b><br><b>(0.63-0.82)</b> | <b>0.63</b><br><b>(0.51-0.78)</b> | <b>0.83</b><br><b>(0.69-0.99)</b> | <b>0.61</b><br><b>(0.54-0.69)</b> | <b>0.53</b><br><b>(0.43-0.65)</b> | <b>0.65</b><br><b>(0.54-0.78)</b> | <b>0.90</b><br><b>(0.84-0.96)</b> | <b>0.83</b><br><b>(0.76-0.91)</b> | 0.91<br>(0.81-1.03) | <b>0.40</b><br><b>(0.31-0.51)</b> | <b>0.34</b><br><b>(0.22-0.55)</b> | <b>0.47</b><br><b>(0.35-0.64)</b> |

Abbreviations: ref (reference)

Adjusted for sex (male, female), annual household income (<\$35,000, \$35,000-\$74,999, \$75,000+), educational attainment (<high school, high school graduate, some college, ≥college), unemployed/not in the labor force (yes, no), occupational class (professional/management, support services, laborers), marital/cohabitating status (married/cohabitating, divorced/widowed, single), region of residence (Northeast, Midwest, South, West), heavy alcohol consumption (≥2 drinks/day for women and ≥3 drinks/day for men), serious psychological distress (Kessler-6 psychological distress scale score ≥13), "ideal" cardiovascular health (never smoking/quit >12 months prior to interview, BMI <25 kg/m<sup>2</sup>, meeting physical activity guidelines, and no prior diagnosis of dyslipidemia, hypertension, or diabetes/prediabetes), and cancer.

Note. All estimates are weighted for the survey's complex sampling design. Trouble falling asleep, trouble staying asleep, sleep medication use, and restorative sleep were measured during the survey years 2013-2017.

Supplemental Table 7. Fully-Adjusted Prevalence Ratios of Sleep Characteristics for Hispanic/Latino Heritage Groups compared to foreign-born non-Hispanic Whites, Stratified by Sex/Gender, National Health Interview Survey, 2004-2017 (N=56,372)

| Group (n)                                    | Prevalence Ratio (95% Confidence Interval)             |                                   |                                   |                                   |                                 |                                   |                                                       |                                   |                                                       |                                   |                                                    |                     |                                                     |                                   |
|----------------------------------------------|--------------------------------------------------------|-----------------------------------|-----------------------------------|-----------------------------------|---------------------------------|-----------------------------------|-------------------------------------------------------|-----------------------------------|-------------------------------------------------------|-----------------------------------|----------------------------------------------------|---------------------|-----------------------------------------------------|-----------------------------------|
|                                              | Sleep Duration<br>(reference: recommended (7-9 hours)) |                                   |                                   |                                   |                                 |                                   | Sleep Quality in the Past Week                        |                                   |                                                       |                                   |                                                    |                     |                                                     |                                   |
|                                              | Very Short<br>(≤5-hours)<br>(n=4,115)                  |                                   | Short<br>(<7-hours)<br>(n=14,048) |                                   | Long<br>(>9-hours)<br>(n=1,586) |                                   | Trouble Falling<br>Asleep<br>(≥3 nights)<br>(n=3,431) |                                   | Trouble Staying<br>Asleep<br>(≥3 nights)<br>(n=3,520) |                                   | Non-restorative<br>Sleep<br>(≥3 days)<br>(n=7,734) |                     | Sleep Medication<br>Use<br>(≥3 nights)<br>(n=1,073) |                                   |
| Sex/Gender                                   | Men                                                    | Women                             | Men                               | Women                             | Men                             | Women                             | Men                                                   | Women                             | Men                                                   | Women                             | Men                                                | Women               | Men                                                 | Women                             |
| Foreign-born Non-Hispanic White<br>(n=8,857) | Ref                                                    | Ref                               | Ref                               | Ref                               | Ref                             | Ref                               | Ref                                                   | Ref                               | Ref                                                   | Ref                               | Ref                                                | Ref                 | Ref                                                 | Ref                               |
| <b>Mexican</b>                               |                                                        |                                   |                                   |                                   |                                 |                                   |                                                       |                                   |                                                       |                                   |                                                    |                     |                                                     |                                   |
| <b>Overall (n=30,100)</b>                    | 1.23<br>(1.00-1.51)                                    | 1.00<br>(0.84-1.19)               | <b>1.14</b><br><b>(1.05-1.24)</b> | <b>1.09</b><br><b>(1.02-1.18)</b> | 1.26<br>(0.92-1.73)             | 0.90<br>(0.68-1.19)               | 0.87<br>(0.69-1.09)                                   | 0.97<br>(0.84-1.12)               | 0.85<br>(0.70-1.02)                                   | 0.87<br>(0.76-1.01)               | <b>1.15</b><br><b>(1.03-1.29)</b>                  | 0.99<br>(0.91-1.08) | 1.03<br>(0.72-1.47)                                 | 0.85<br>(0.65-1.13)               |
| <b>U.S.-born (yes)</b><br>(n=14,282)         | <b>1.31</b><br><b>(1.06-1.61)</b>                      | 1.06<br>(0.88-1.26)               | <b>1.23</b><br><b>(1.12-1.35)</b> | <b>1.15</b><br><b>(1.06-1.24)</b> | 1.20<br>(0.86-1.68)             | 0.91<br>(0.69-1.20)               | 1.00<br>(0.79-1.27)                                   | 1.00<br>(0.85-1.17)               | 1.03<br>(0.84-1.27)                                   | 0.92<br>(0.78-1.08)               | <b>1.17</b><br><b>(1.04-1.31)</b>                  | 0.99<br>(0.90-1.09) | 1.06<br>(0.75-1.50)                                 | 0.91<br>(0.69-1.22)               |
| <b>U.S.-born (no)</b><br>(n=15,818)          | 0.99<br>(0.73-1.34)                                    | 0.80<br>(0.62-1.02)               | 1.00<br>(0.89-1.12)               | 0.96<br>(0.87-1.07)               | 1.20<br>(0.82-1.76)             | 0.92<br>(0.63-1.34)               | <b>0.71</b><br><b>(0.52-0.96)</b>                     | 0.86<br>(0.71-1.05)               | <b>0.62</b><br><b>(0.48-0.79)</b>                     | <b>0.80</b><br><b>(0.66-0.98)</b> | 1.07<br>(0.92-1.24)                                | 0.97<br>(0.87-1.08) | 0.80<br>(0.45-1.40)                                 | <b>0.64</b><br><b>(0.42-0.99)</b> |
| <b>Puerto Rican</b>                          |                                                        |                                   |                                   |                                   |                                 |                                   |                                                       |                                   |                                                       |                                   |                                                    |                     |                                                     |                                   |
| <b>Overall (n=5,077)</b>                     | <b>1.84</b><br><b>(1.46-2.30)</b>                      | <b>1.64</b><br><b>(1.36-1.99)</b> | <b>1.39</b><br><b>(1.26-1.54)</b> | <b>1.29</b><br><b>(1.17-1.42)</b> | 1.27<br>(0.90-1.81)             | 0.97<br>(0.71-1.33)               | 1.13<br>(0.88-1.47)                                   | <b>1.24</b><br><b>(1.05-1.47)</b> | 1.26<br>(0.99-1.60)                                   | 1.04<br>(0.88-1.22)               | 1.02<br>(0.88-1.18)                                | 1.08<br>(0.97-1.20) | <b>1.62</b><br><b>(1.11-2.37)</b>                   | 1.19<br>(0.92-1.56)               |
| <b>U.S.-born (yes)</b><br>(n=2,544)          | <b>1.83</b><br><b>(1.37-2.45)</b>                      | <b>1.79</b><br><b>(1.39-2.29)</b> | <b>1.43</b><br><b>(1.26-1.62)</b> | <b>1.32</b><br><b>(1.19-1.49)</b> | 1.63<br>(0.99-2.70)             | 1.11<br>(0.74-1.66)               | 1.05<br>(0.75-1.47)                                   | <b>1.32</b><br><b>(1.07-1.62)</b> | 1.36<br>(1.00-1.85)                                   | 1.08<br>(0.88-1.33)               | 0.96<br>(0.80-1.16)                                | 1.12<br>(0.99-1.26) | <b>1.68</b><br><b>(1.08-2.63)</b>                   | 1.12<br>(0.81-1.55)               |
| <b>U.S.-born (no)</b><br>(n=2,533)           | <b>1.77</b><br><b>(1.31-2.37)</b>                      | <b>1.44</b><br><b>(1.15-1.81)</b> | <b>1.33</b><br><b>(1.17-1.51)</b> | <b>1.20</b><br><b>(1.07-1.35)</b> | 1.07<br>(0.70-1.65)             | 0.92<br>(0.64-1.34)               | 1.24<br>(0.91-1.68)                                   | 1.20<br>(0.97-1.48)               | 1.15<br>(0.85-1.55)                                   | 1.02<br>(0.83-1.26)               | 1.10<br>(0.91-1.33)                                | 1.02<br>(0.89-1.18) | <b>1.74</b><br><b>(1.06-2.83)</b>                   | 1.31<br>(0.95-1.81)               |
| <b>Cuban</b>                                 |                                                        |                                   |                                   |                                   |                                 |                                   |                                                       |                                   |                                                       |                                   |                                                    |                     |                                                     |                                   |
| <b>Overall (n=2,518)</b>                     | 1.01<br>(0.71-1.45)                                    | 0.92<br>(0.68-1.26)               | 0.95<br>(0.81-1.12)               | 1.02<br>(0.88-1.17)               | 0.81<br>(0.47-1.39)             | <b>0.56</b><br><b>(0.35-0.91)</b> | 0.91<br>(0.65-1.36)                                   | 0.96<br>(0.72-1.30)               | 0.90<br>(0.66-1.22)                                   | 0.97<br>(0.74-1.28)               | 1.02<br>(0.83-1.24)                                | 1.07<br>(0.88-1.28) | 0.98<br>(0.57-1.70)                                 | 1.13<br>(0.75-1.69)               |
| <b>U.S.-born Cuban (yes)</b><br>(n=559)      | 0.93<br>(0.48-1.80)                                    | 1.11<br>(0.71-1.74)               | 1.12<br>(0.88-1.43)               | 1.16<br>(0.93-1.44)               | 0.59<br>(0.19-1.85)             | 1.05<br>(0.43-2.52)               | 1.14<br>(0.64-2.02)                                   | 1.18<br>(0.76-1.83)               | 1.28<br>(0.79-2.09)                                   | 1.04<br>(0.63-1.73)               | 0.98<br>(0.72-1.35)                                | 1.13<br>(0.86-1.49) | 0.85<br>(0.24-2.99)                                 | <b>2.09</b><br><b>(1.08-4.01)</b> |
| <b>U.S.-born Cuban (no)</b><br>(n=1,959)     | 1.04<br>(0.70-1.57)                                    | 0.85<br>(0.59-1.22)               | 0.89<br>(0.74-1.08)               | 0.96<br>(0.81-1.13)               | 0.85<br>(0.49-1.49)             | <b>0.47</b><br><b>(0.27-0.80)</b> | 0.83<br>(0.52-1.32)                                   | 0.86<br>(0.60-1.23)               | 0.76<br>(0.54-1.07)                                   | 0.94<br>(0.66-1.35)               | 1.02<br>(0.81-1.29)                                | 1.05<br>(0.85-1.31) | 1.01<br>(0.55-1.85)                                 | 0.87<br>(0.55-1.38)               |
| <b>Dominican</b>                             |                                                        |                                   |                                   |                                   |                                 |                                   |                                                       |                                   |                                                       |                                   |                                                    |                     |                                                     |                                   |
| <b>Overall (n=1,658)</b>                     | 1.21<br>(0.81-1.78)                                    | 1.07<br>(0.79-1.43)               | 1.00<br>(0.83-1.21)               | 1.03<br>(0.87-1.21)               | 1.39<br>(0.81-2.40)             | 0.61<br>(0.27-1.38)               | 0.76<br>(0.47-1.23)                                   | 0.97<br>(0.73-1.29)               | 0.77<br>(0.47-1.27)                                   | 0.99<br>(0.72-1.36)               | 1.01<br>(0.80-1.26)                                | 0.98<br>(0.82-1.17) | 1.11<br>(0.54-2.29)                                 | 0.94<br>(0.59-1.51)               |
| <b>U.S.-born (yes)</b><br>(n=264)            | 1.61<br>(0.78-3.30)                                    | 1.15<br>(0.58-2.26)               | 1.05<br>(0.73-1.52)               | <b>1.42</b><br><b>(1.04-1.95)</b> | 1.40<br>(0.32-6.12)             | 2.40<br>(0.83-6.95)               | 1.06<br>(0.52-2.17)                                   | 0.72<br>(0.40-1.31)               | 1.30<br>(0.51-3.34)                                   | 1.18<br>(0.64-2.18)               | 1.10<br>(0.72-1.67)                                | 0.97<br>(0.68-1.37) | 1.88<br>(0.57-6.19)                                 | 0.68<br>(0.23-1.98)               |
| <b>U.S.-born (no)</b><br>(n=1,394)           | 1.09<br>(0.72-1.64)                                    | 1.04<br>(0.77-1.39)               | 0.99<br>(0.81-1.21)               | 0.92<br>(0.78-1.09)               | 1.42<br>(0.79-2.54)             | <b>0.34</b><br><b>(0.16-0.72)</b> | 0.67<br>(0.39-1.15)                                   | 1.03<br>(0.76-1.40)               | 0.65<br>(0.36-1.17)                                   | 0.96<br>(0.68-1.35)               | 0.99<br>(0.74-1.32)                                | 0.98<br>(0.81-1.19) | 0.96<br>(0.43-2.14)                                 | 0.98<br>(0.58-1.65)               |
| <b>Central/South American</b>                |                                                        |                                   |                                   |                                   |                                 |                                   |                                                       |                                   |                                                       |                                   |                                                    |                     |                                                     |                                   |



|                                                         |                                   |                     |                                   |                     |                     |                                   |                     |                                   |                     |                                   |                     |                     |                                   |                     |
|---------------------------------------------------------|-----------------------------------|---------------------|-----------------------------------|---------------------|---------------------|-----------------------------------|---------------------|-----------------------------------|---------------------|-----------------------------------|---------------------|---------------------|-----------------------------------|---------------------|
|                                                         |                                   |                     |                                   |                     |                     |                                   |                     |                                   |                     |                                   |                     |                     |                                   |                     |
| <b>Overall (n=8,162)</b>                                | 1.12<br>(0.87-1.45)               | 0.91<br>(0.76-1.10) | <b>1.17</b><br><b>(1.06-1.30)</b> | 1.02<br>(0.93-1.12) | 0.92<br>(0.56-1.51) | <b>0.68</b><br><b>(0.48-0.94)</b> | 0.86<br>(0.63-1.16) | 1.01<br>(0.83-1.24)               | 0.77<br>(0.59-1.01) | 0.99<br>(0.81-1.21)               | 1.02<br>(0.89-1.16) | 1.03<br>(0.93-1.14) | <b>0.62</b><br><b>(0.39-0.99)</b> | 0.73<br>(0.51-1.06) |
| <b>U.S.-born Central/South American (yes) (n=1,113)</b> | <b>1.62</b><br><b>(1.03-2.54)</b> | 1.26<br>(0.86-1.84) | <b>1.45</b><br><b>(1.21-1.74)</b> | 1.15<br>(0.95-1.38) | 0.76<br>(0.34-1.70) | 1.22<br>(0.64-2.30)               | 1.01<br>(0.61-1.67) | <b>1.47</b><br><b>(1.09-1.99)</b> | 0.83<br>(0.51-1.36) | <b>1.43</b><br><b>(1.03-1.99)</b> | 1.05<br>(0.83-1.33) | 1.11<br>(0.93-1.31) | 1.56<br>(0.72-3.38)               | 0.67<br>(0.31-1.45) |
| <b>U.S.-born Central/South American (no) (n=7,049)</b>  | 1.02<br>(0.78-1.35)               | 0.84<br>(0.69-1.04) | <b>1.13</b><br><b>(1.02-1.25)</b> | 0.99<br>(0.89-1.09) | 0.98<br>(0.58-1.67) | <b>0.65</b><br><b>(0.45-0.93)</b> | 0.79<br>(0.57-1.09) | 0.90<br>(0.72-1.11)               | 0.77<br>(0.58-1.02) | 0.90<br>(0.74-1.11)               | 1.00<br>(0.86-1.15) | 1.01<br>(0.91-1.12) | <b>0.48</b><br><b>(0.29-0.79)</b> | 0.74<br>(0.50-1.10) |

Abbreviations: ref (reference)

Adjusted for age (18-30, 31-49, 50-64, 65+ years), annual household income (<\$35,000, \$35,000-\$74,999, \$75,000+), educational attainment (<high school, high school graduate, some college, ≥college), unemployed/not in the labor force (yes, no), occupational class (professional/management, support services, laborers), marital/cohabitating status (married/cohabitating, divorced/widowed, single), region of residence (Northeast, Midwest, South, West), heavy alcohol consumption (≥2 drinks/day for women and ≥3 drinks/day for men), serious psychological distress (Kessler-6 psychological distress scale score ≥13), "ideal" cardiovascular health (never smoking/quit >12 months prior to interview, BMI <25 kg/m<sup>2</sup>, meeting physical activity guidelines, and no prior diagnosis of dyslipidemia, hypertension, or diabetes/prediabetes), and cancer.

Note. All estimates are weighted for the survey's complex sampling design. Trouble falling asleep, trouble staying asleep, sleep medication use, and restorative sleep were measured during the survey years 2013-2017.



Supplemental Table 8. Fully-Adjusted Prevalence Ratios of Sleep Characteristics for Hispanic/Latino Heritage Groups compared to foreign-born non-Hispanic Whites, Stratified by Age Group, National Health Interview Survey, 2004-2017 (N=56,372)

| Group (n)                                          | Prevalence Ratio (95% Confidence Interval)             |                                     |                                     |                                     |                                     |                                     |                                 |                     |                                     |                                                       |                                     |                                     |                                                       |                                     |                                     |                                                    |                     |                     |                                                     |                                     |                     |
|----------------------------------------------------|--------------------------------------------------------|-------------------------------------|-------------------------------------|-------------------------------------|-------------------------------------|-------------------------------------|---------------------------------|---------------------|-------------------------------------|-------------------------------------------------------|-------------------------------------|-------------------------------------|-------------------------------------------------------|-------------------------------------|-------------------------------------|----------------------------------------------------|---------------------|---------------------|-----------------------------------------------------|-------------------------------------|---------------------|
|                                                    | Sleep Duration<br>(reference: recommended (7-9 hours)) |                                     |                                     |                                     |                                     |                                     |                                 |                     |                                     | Sleep Quality in the Past Week                        |                                     |                                     |                                                       |                                     |                                     |                                                    |                     |                     |                                                     |                                     |                     |
|                                                    | Very Short<br>(≤5-hours)<br>(n=4,115)                  |                                     |                                     | Short<br>(<7-hours)<br>(n=14,048)   |                                     |                                     | Long<br>(>9-hours)<br>(n=1,586) |                     |                                     | Trouble Falling<br>Asleep<br>(≥3 nights)<br>(n=3,431) |                                     |                                     | Trouble Staying<br>Asleep<br>(≥3 nights)<br>(n=3,520) |                                     |                                     | Non-restorative<br>Sleep<br>(≥3 days)<br>(n=7,734) |                     |                     | Sleep Medication<br>Use<br>(≥3 nights)<br>(n=1,073) |                                     |                     |
| Age (years)<br>Group                               | 18-30                                                  | 31-49                               | 50+                                 | 18-30                               | 31-49                               | 50+                                 | 18-30                           | 31-49               | 50+                                 | 18-30                                                 | 31-49                               | 50+                                 | 18-30                                                 | 31-49                               | 50+                                 | 18-30                                              | 31-49               | 50+                 | 18-30                                               | 31-49                               | 50+                 |
| Foreign-born<br>Non-Hispanic<br>White<br>(n=8,857) | Ref                                                    | Ref                                 | Ref                                 | Ref                                 | Ref                                 | Ref                                 | Ref                             | Ref                 | Ref                                 | Ref                                                   | Ref                                 | Ref                                 | Ref                                                   | Ref                                 | Ref                                 | Ref                                                | Ref                 | Ref                 | Ref                                                 | Ref                                 | Ref                 |
| <b>Mexican</b>                                     |                                                        |                                     |                                     |                                     |                                     |                                     |                                 |                     |                                     |                                                       |                                     |                                     |                                                       |                                     |                                     |                                                    |                     |                     |                                                     |                                     |                     |
| <b>Overall</b><br>(n=30,100)                       | 1.04<br>(0.76-1.44)                                    | 1.26<br>(1.00-1.58)                 | 0.99<br>(0.83-1.19)                 | 1.15<br>(0.99-1.33)                 | <b>1.17</b><br>( <b>1.08-1.28</b> ) | 1.03<br>(0.94-1.13)                 | 1.51<br>(0.96-2.38)             | 1.02<br>(0.65-1.61) | 0.79<br>(0.60-1.04)                 | 0.97<br>(0.71-1.32)                                   | <b>0.81</b><br>( <b>0.67-0.98</b> ) | 1.01<br>(0.84-1.21)                 | 0.97<br>(0.67-1.40)                                   | 0.82<br>(0.67-1.01)                 | 0.90<br>(0.78-1.04)                 | 1.09<br>(0.93-1.27)                                | 1.10<br>(0.99-1.21) | 1.04<br>(0.93-1.17) | 1.17<br>(0.59-2.32)                                 | 0.81<br>(0.51-1.28)                 | 0.89<br>(0.70-1.15) |
| <b>U.S.-born<br/>(yes)</b><br>(n=14,282)           | 1.12<br>(0.80-1.58)                                    | <b>1.43</b><br>( <b>1.14-1.81</b> ) | 1.02<br>(0.86-1.21)                 | 1.19<br>(1.02-1.39)                 | <b>1.31</b><br>( <b>1.20-1.43</b> ) | 1.07<br>(0.97-1.17)                 | 1.45<br>(0.93-2.26)             | 1.06<br>(0.64-1.75) | 0.81<br>(0.61-1.07)                 | 1.07<br>(0.77-1.48)                                   | 0.93<br>(0.75-1.15)                 | 1.02<br>(0.84-1.25)                 | 1.08<br>(0.73-1.60)                                   | 0.94<br>(0.75-1.17)                 | 0.98<br>(0.84-1.16)                 | 1.06<br>(0.90-1.24)                                | 1.13<br>(1.01-1.26) | 1.04<br>(0.92-1.18) | 1.44<br>(0.70-2.95)                                 | 1.02<br>(0.63-1.63)                 | 0.85<br>(0.66-1.11) |
| <b>U.S.-born<br/>(no)</b><br>(n=15,818)            | 0.84<br>(0.54-1.29)                                    | 0.97<br>(0.72-1.30)                 | 0.87<br>(0.64-1.17)                 | 0.96<br>(0.77-1.20)                 | 1.03<br>(0.92-1.16)                 | 0.94<br>(0.83-1.07)                 | 1.67<br>(0.99-2.82)             | 1.04<br>(0.62-1.74) | <b>0.67</b><br>( <b>0.47-0.94</b> ) | 0.76<br>(0.53-1.10)                                   | <b>0.71</b><br>( <b>0.54-0.92</b> ) | 0.91<br>(0.72-1.15)                 | 0.85<br>(0.54-1.32)                                   | <b>0.65</b><br>( <b>0.50-0.85</b> ) | <b>0.76</b><br>( <b>0.62-0.93</b> ) | 1.12<br>(0.92-1.37)                                | 1.01<br>(0.89-1.15) | 1.01<br>(0.87-1.19) | NE                                                  | <b>0.41</b><br>( <b>0.22-0.76</b> ) | 0.91<br>(0.60-1.39) |
| <b>Puerto Rican</b>                                |                                                        |                                     |                                     |                                     |                                     |                                     |                                 |                     |                                     |                                                       |                                     |                                     |                                                       |                                     |                                     |                                                    |                     |                     |                                                     |                                     |                     |
| <b>Overall</b><br>(n=5,077)                        | <b>1.87</b><br>( <b>1.24-2.81</b> )                    | <b>1.92</b><br>( <b>1.49-2.47</b> ) | <b>1.58</b><br>( <b>1.32-1.90</b> ) | <b>1.44</b><br>( <b>1.20-1.73</b> ) | <b>1.37</b><br>( <b>1.22-1.53</b> ) | <b>1.27</b><br>( <b>1.15-1.40</b> ) | 1.67<br>(0.92-3.02)             | 1.30<br>(0.78-2.14) | 0.80<br>(0.59-1.09)                 | 1.01<br>(0.71-1.45)                                   | 1.07<br>(0.82-1.39)                 | <b>1.45</b><br>( <b>1.18-1.78</b> ) | 1.05<br>(0.67-1.64)                                   | 1.21<br>(0.92-1.58)                 | 1.14<br>(0.95-1.37)                 | 1.03<br>(0.85-1.25)                                | 1.07<br>(0.92-1.25) | 1.13<br>(0.98-1.32) | 1.61<br>(0.87-2.96)                                 | 1.20<br>(0.78-1.86)                 | 1.30<br>(1.00-1.68) |
| <b>U.S.-born<br/>(yes)</b><br>(n=2,544)            | <b>1.88</b><br>( <b>1.22-2.90</b> )                    | <b>2.08</b><br>( <b>1.59-2.72</b> ) | <b>1.56</b><br>( <b>1.14-2.13</b> ) | <b>1.40</b><br>( <b>1.15-1.70</b> ) | <b>1.43</b><br>( <b>1.27-1.62</b> ) | <b>1.27</b><br>( <b>1.08-1.49</b> ) | 1.71<br>(0.91-3.19)             | 1.51<br>(0.85-2.68) | 0.58<br>(0.31-1.07)                 | 1.11<br>(0.76-1.63)                                   | 1.01<br>(0.75-1.35)                 | <b>1.61</b><br>( <b>1.23-2.11</b> ) | 1.02<br>(0.62-1.67)                                   | 1.28<br>(0.94-1.75)                 | 1.25<br>(0.95-1.65)                 | 1.06<br>(0.87-1.29)                                | 1.07<br>(0.90-1.27) | 1.17<br>(0.97-1.42) | 1.33<br>(0.66-2.69)                                 | 0.99<br>(0.65-1.51)                 | 1.34<br>(0.95-1.91) |
| <b>U.S.-born<br/>(no)</b><br>(n=2,533)             | 1.69<br>(0.99-2.88)                                    | <b>1.51</b><br>( <b>1.04-2.20</b> ) | <b>1.61</b><br>( <b>1.31-1.97</b> ) | <b>1.38</b><br>( <b>1.05-1.79</b> ) | <b>1.20</b><br>( <b>1.02-1.42</b> ) | <b>1.27</b><br>( <b>1.14-1.42</b> ) | 0.77<br>(0.37-1.58)             | 1.25<br>(0.68-2.32) | 0.87<br>(0.63-1.21)                 | 0.87<br>(0.49-1.53)                                   | 1.22<br>(0.87-1.71)                 | <b>1.40</b><br>( <b>1.11-1.78</b> ) | 1.17<br>(0.62-2.22)                                   | 1.08<br>(0.76-1.53)                 | 1.09<br>(0.88-1.33)                 | 1.01<br>(0.75-1.37)                                | 1.08<br>(0.89-1.32) | 1.12<br>(0.94-1.33) | NE                                                  | 1.59<br>(0.90-2.84)                 | 1.27<br>(0.93-1.73) |
| <b>Cuban</b>                                       |                                                        |                                     |                                     |                                     |                                     |                                     |                                 |                     |                                     |                                                       |                                     |                                     |                                                       |                                     |                                     |                                                    |                     |                     |                                                     |                                     |                     |
| <b>Overall</b><br>(n=2,518)                        | 0.77<br>(0.37-1.58)                                    | 0.99<br>(0.67-1.47)                 | 1.02<br>(0.74-1.40)                 | 0.77<br>(0.56-1.04)                 | 1.01<br>(0.84-1.21)                 | 1.03<br>(0.90-1.19)                 | NE                              | 0.92<br>(0.42-2.03) | <b>0.55</b><br>( <b>0.37-0.81</b> ) | <b>0.42</b><br>( <b>0.21-0.85</b> )                   | 1.00<br>(0.67-1.51)                 | 1.10<br>(0.81-1.50)                 | 0.58<br>(0.26-1.31)                                   | 1.05<br>(0.75-1.47)                 | 0.98<br>(0.76-1.27)                 | 0.99<br>(0.73-1.34)                                | 0.97<br>(0.80-1.18) | 1.11<br>(0.91-1.34) | NE                                                  | 1.58<br>(0.77-3.23)                 | 1.06<br>(0.71-1.58) |
| <b>U.S.-born<br/>Cuban (yes)</b><br>(n=559)        | 0.70<br>(0.34-1.44)                                    | 1.11<br>(0.61-2.00)                 | 1.45<br>(0.81-2.59)                 | 0.97<br>(0.71-1.33)                 | 1.28<br>(1.03-1.58)                 | 0.97<br>(0.64-1.48)                 | NE                              | 0.59<br>(0.14-2.51) | 0.16<br>(0.02-1.23)                 | 0.73<br>(0.38-1.40)                                   | 1.39<br>(0.85-2.27)                 | 1.64<br>(0.88-3.08)                 | 0.90<br>(0.42-1.91)                                   | 1.37<br>(0.84-2.22)                 | 1.27<br>(0.76-2.11)                 | 1.08<br>(0.78-1.50)                                | 1.05<br>(0.79-1.38) | 0.98<br>(0.57-1.68) | NE                                                  | 2.92<br>(1.39-6.12)                 | 0.75<br>(0.31-1.83) |

|                                                            |                     |                                   |                     |                                   |                                   |                     |                     |                      |                                   |                                   |                     |                     |                                   |                     |                     |                     |                     |                     |    |                                   |                                   |  |
|------------------------------------------------------------|---------------------|-----------------------------------|---------------------|-----------------------------------|-----------------------------------|---------------------|---------------------|----------------------|-----------------------------------|-----------------------------------|---------------------|---------------------|-----------------------------------|---------------------|---------------------|---------------------|---------------------|---------------------|----|-----------------------------------|-----------------------------------|--|
| <b>U.S.-born Cuban (no)</b><br>(n=1,959)                   | 0.80<br>(0.28-2.27) | 0.94<br>(0.60-1.49)               | 0.97<br>(0.69-1.37) | <b>0.49</b><br><b>(0.29-0.82)</b> | 0.88<br>(0.68-1.13)               | 1.04<br>(0.90-1.20) | NE                  | 1.06<br>(0.43-2.64)  | <b>0.57</b><br><b>(0.39-0.84)</b> | <b>0.08</b><br><b>(0.01-0.61)</b> | 0.79<br>(0.44-1.39) | 1.04<br>(0.76-1.43) | <b>0.15</b><br><b>(0.03-0.72)</b> | 0.89<br>(0.55-1.44) | 0.95<br>(0.71-1.27) | 0.87<br>(0.55-1.36) | 0.93<br>(0.74-1.18) | 1.14<br>(0.93-1.40) | NE | 0.75<br>(0.25-2.23)               | 1.10<br>(0.72-1.69)               |  |
| <b>Dominican</b>                                           |                     |                                   |                     |                                   |                                   |                     |                     |                      |                                   |                                   |                     |                     |                                   |                     |                     |                     |                     |                     |    |                                   |                                   |  |
| <b>Overall</b><br>(n=1,658)                                | 0.81<br>(0.44-1.48) | 1.18<br>(0.77-1.79)               | 1.29<br>(0.98-1.70) | 0.96<br>(0.69-1.34)               | 1.08<br>(0.89-1.32)               | 1.02<br>(0.87-1.21) | NE                  | 0.92<br>(0.36-2.39)  | <b>0.41</b><br><b>(0.19-0.85)</b> | 0.80<br>(0.46-1.39)               | 0.92<br>(0.58-1.44) | 1.00<br>(0.72-1.39) | 1.22<br>(0.63-2.35)               | 0.74<br>(0.44-1.24) | 1.00<br>(0.72-1.39) | 0.96<br>(0.72-1.29) | 0.86<br>(0.68-1.08) | 1.25<br>(1.01-1.56) | NE | 0.58<br>(0.28-1.23)               | 1.33<br>(0.79-2.23)               |  |
| <b>U.S.-born (yes)</b><br>(n=264)                          | 0.80<br>(0.35-1.84) | <b>2.84</b><br><b>(1.64-4.93)</b> | 1.80<br>(0.42-7.78) | 0.98<br>(0.65-1.49)               | 1.70<br>(1.34-2.16)               | 0.97<br>(0.43-2.17) | NE                  | 4.28<br>(1.23-14.91) | NE                                | 0.81<br>(0.41-1.63)               | 1.09<br>(0.52-2.33) | 0.91<br>(0.14-6.03) | 1.22<br>(0.62-2.39)               | 1.53<br>(0.77-3.03) | 0.60<br>(0.84-4.34) | 0.93<br>(0.64-1.37) | 1.11<br>(0.79-1.57) | 1.74<br>(0.73-4.13) | NE | 2.01<br>(0.76-5.34)               | 0.69<br>(0.08-6.05)               |  |
| <b>U.S.-born (no)</b><br>(n=1,394)                         | 0.78<br>(0.40-1.54) | 0.95<br>(0.59-1.51)               | 1.28<br>(0.97-1.68) | 0.86<br>(0.57-1.29)               | 0.96<br>(0.76-1.21)               | 1.03<br>(0.87-1.21) | NE                  | 0.59<br>(0.20-1.76)  | <b>0.43</b><br><b>(0.20-0.90)</b> | 0.77<br>(0.37-1.63)               | 0.86<br>(0.53-1.39) | 1.00<br>(0.72-1.39) | 1.16<br>(0.41-3.31)               | 0.60<br>(0.34-1.06) | 1.01<br>(0.73-1.41) | 1.04<br>(0.70-1.54) | 0.80<br>(0.62-1.04) | 1.24<br>(0.98-1.57) | NE | <b>0.31</b><br><b>(0.13-0.73)</b> | 1.36<br>(0.80-2.30)               |  |
| <b>Central/South American</b>                              |                     |                                   |                     |                                   |                                   |                     |                     |                      |                                   |                                   |                     |                     |                                   |                     |                     |                     |                     |                     |    |                                   |                                   |  |
| <b>Overall</b><br>(n=8,162)                                | 1.02<br>(0.69-1.51) | 1.12<br>(0.87-1.46)               | 0.88<br>(0.71-1.10) | 1.13<br>(0.94-1.36)               | <b>1.17</b><br><b>(1.06-1.29)</b> | 0.98<br>(0.89-1.10) | 1.44<br>(0.84-2.46) | 0.91<br>(0.54-1.54)  | <b>0.42</b><br><b>(0.26-0.67)</b> | 0.83<br>(0.59-1.17)               | 1.04<br>(0.78-1.39) | 0.94<br>(0.75-1.17) | 1.07<br>(0.72-1.59)               | 0.84<br>(0.65-1.09) | 0.83<br>(0.67-1.02) | 1.06<br>(0.89-1.25) | 1.03<br>(0.92-1.15) | 1.02<br>(0.88-1.18) | NE | 0.65<br>(0.38-1.12)               | <b>0.65</b><br><b>(0.46-0.90)</b> |  |
| <b>U.S.-born Central/South American (yes)</b><br>(n=1,113) | 1.25<br>(0.79-1.98) | <b>1.80</b><br><b>(1.22-2.65)</b> | 0.86<br>(0.37-1.97) | <b>1.28</b><br><b>(1.03-1.59)</b> | <b>1.33</b><br><b>(1.11-1.58)</b> | 0.96<br>(0.62-1.49) | 1.22<br>(0.67-2.23) | 1.14<br>(0.38-3.41)  | 0.28<br>(0.06-1.27)               | 1.04<br>(0.71-1.52)               | 1.40<br>(0.97-2.04) | 1.65<br>(1.03-2.64) | 1.21<br>(0.77-1.90)               | 0.99<br>(0.68-1.44) | 1.10<br>(0.65-1.87) | 1.08<br>(0.90-1.31) | 1.10<br>(0.90-1.33) | 0.81<br>(0.47-1.40) | NE | <b>0.31</b><br><b>(0.13-0.69)</b> | 1.79<br>(0.86-3.70)               |  |
| <b>U.S.-born Central/South American (no)</b><br>(n=7,049)  | 0.89<br>(0.57-1.40) | 1.00<br>(0.75-1.33)               | 0.88<br>(0.71-1.10) | 1.02<br>(0.82-1.26)               | <b>1.14</b><br><b>(1.02-1.27)</b> | 0.98<br>(0.88-1.09) | NE                  | 0.92<br>(0.53-1.61)  | <b>0.42</b><br><b>(0.26-0.68)</b> | 0.67<br>(0.44-1.03)               | 0.94<br>(0.68-1.32) | 0.90<br>(0.71-1.13) | 0.95<br>(0.59-1.52)               | 0.83<br>(0.62-1.11) | 0.81<br>(0.65-1.01) | 1.00<br>(0.81-1.24) | 1.01<br>(0.90-1.13) | 1.03<br>(0.89-1.19) | NE | 0.75<br>(0.41-1.38)               | <b>0.60</b><br><b>(0.42-0.84)</b> |  |

Abbreviations: ref (reference)

Adjusted for sex (male, female), annual household income (<\$35,000, \$35,000-\$74,999, \$75,000+), educational attainment (<high school, high school graduate, some college, ≥college), unemployed/not in the labor force (yes, no), occupational class (professional/management, support services, laborers), marital/cohabitating status (married/cohabitating, divorced/widowed, single), region of residence (Northeast, Midwest, South, West), heavy alcohol consumption (≥2 drinks/day for women and ≥3 drinks/day for men), serious psychological distress (Kessler-6 psychological distress scale score ≥13), "ideal" cardiovascular health (never smoking/quit >12 months prior to interview, BMI <25 kg/m<sup>2</sup>, meeting physical activity guidelines, and no prior diagnosis of dyslipidemia, hypertension, or diabetes/prediabetes), and cancer.

Note. All estimates are weighted for the survey's complex sampling design. Trouble falling asleep, trouble staying asleep, sleep medication use, and restorative sleep were measured during the survey years 2013-2017.

**Supplemental Table 9. Fully-Adjusted Prevalence Ratios of Sleep Characteristics for Hispanic/Latino Heritage Groups compared to US-born non-Hispanic Whites by Language Acculturation Status\*, Stratified by Sex/Gender, National Health Interview Survey, 2004-2017 (N=245,812)**

| Group (n)                                          | Prevalence Ratio (95% Confidence Interval)             |                                   |                                   |                                   |                                   |                                   |                                                        |                                   |                                                        |                                   |                                                     |                                   |                                                      |                                   |
|----------------------------------------------------|--------------------------------------------------------|-----------------------------------|-----------------------------------|-----------------------------------|-----------------------------------|-----------------------------------|--------------------------------------------------------|-----------------------------------|--------------------------------------------------------|-----------------------------------|-----------------------------------------------------|-----------------------------------|------------------------------------------------------|-----------------------------------|
|                                                    | Sleep Duration<br>(reference: recommended (7-9 hours)) |                                   |                                   |                                   |                                   |                                   | Sleep Quality in the Past Week                         |                                   |                                                        |                                   |                                                     |                                   |                                                      |                                   |
|                                                    | Very Short<br>(≤5-hours)<br>(n=17,112)                 |                                   | Short<br>(<7-hours)<br>(n=61,091) |                                   | Long<br>(>9-hours)<br>(n=7,604)   |                                   | Trouble Falling<br>Asleep<br>(≥3 nights)<br>(n=18,607) |                                   | Trouble Staying<br>Asleep<br>(≥3 nights)<br>(n=26,493) |                                   | Non-restorative<br>Sleep<br>(≥3 days)<br>(n=38,369) |                                   | Sleep Medication<br>Use<br>(≥3 nights)<br>(n=10,024) |                                   |
| Sex/Gender                                         | Men                                                    | Women                             | Men                               | Women                             | Men                               | Women                             | Men                                                    | Women                             | Men                                                    | Women                             | Men                                                 | Women                             | Men                                                  | Women                             |
| <b>U.S.-born Non-Hispanic White</b><br>(n=198,297) | ref                                                    | ref                               | ref                               | ref                               | ref                               | ref                               | ref                                                    | ref                               | ref                                                    | ref                               | ref                                                 | ref                               | ref                                                  | ref                               |
| <b>Mexican</b>                                     |                                                        |                                   |                                   |                                   |                                   |                                   |                                                        |                                   |                                                        |                                   |                                                     |                                   |                                                      |                                   |
| <b>U.S.-born (yes)</b><br>(n=14,282)               | 1.02<br>(0.91-1.14)                                    | 1.05<br>(0.96-1.15)               | 1.01<br>(0.96-1.07)               | <b>1.07</b><br><b>(1.03-1.12)</b> | 1.09<br>(0.91-1.31)               | 0.88<br>(0.75-1.03)               | <b>0.92</b><br><b>(0.85-0.99)</b>                      | 0.92<br>(0.84-1.00)               | <b>0.80</b><br><b>(0.74-0.86)</b>                      | <b>0.77</b><br><b>(0.71-0.85)</b> | 0.97<br>(0.93-1.01)                                 | 0.95<br>(0.90-1.00)               | <b>0.66</b><br><b>(0.58-0.76)</b>                    | <b>0.59</b><br><b>(0.50-0.70)</b> |
| <b>High Acculturation</b><br>(n=13,075)            | 1.05<br>(0.93-1.19)                                    | 1.08<br>(0.98-1.19)               | 1.04<br>(0.98-1.10)               | <b>1.09</b><br><b>(1.05-1.14)</b> | 1.12<br>(0.93-1.36)               | 0.86<br>(0.74-1.01)               | 0.94<br>(0.84-1.06)                                    | 0.95<br>(0.87-1.03)               | <b>0.86</b><br><b>(0.76-0.97)</b>                      | <b>0.80</b><br><b>(0.73-0.88)</b> | 1.01<br>(0.95-1.08)                                 | 0.97<br>(0.92-1.02)               | <b>0.78</b><br><b>(0.62-0.99)</b>                    | <b>0.63</b><br><b>(0.53-0.75)</b> |
| <b>Medium/Low Acculturation</b><br>(n=1,188)       | 0.75<br>(0.56-1.01)                                    | 0.79<br>(0.58-1.09)               | <b>0.71</b><br><b>(0.60-0.85)</b> | 0.84<br>(0.70-1.00)               | 0.89<br>(0.58-1.38)               | 0.97<br>(0.60-1.59)               | 0.63<br>(0.40-1.00)                                    | <b>0.59</b><br><b>(0.43-0.83)</b> | <b>0.46</b><br><b>(0.28-0.74)</b>                      | <b>0.43</b><br><b>(0.29-0.64)</b> | 0.82<br>(0.64-1.04)                                 | <b>0.75</b><br><b>(0.61-0.92)</b> | 0.56<br>(0.29-1.08)                                  | <b>0.15</b><br><b>(0.06-0.40)</b> |
| <b>U.S.-born (no)</b><br>(n=15,818)                | <b>0.47</b><br><b>(0.40-0.54)</b>                      | <b>0.60</b><br><b>(0.52-0.69)</b> | <b>0.66</b><br><b>(0.62-0.70)</b> | <b>0.77</b><br><b>(0.71-0.82)</b> | <b>0.83</b><br><b>(0.70-0.99)</b> | <b>0.65</b><br><b>(0.54-0.78)</b> | <b>0.60</b><br><b>(0.55-0.66)</b>                      | <b>0.64</b><br><b>(0.58-0.71)</b> | <b>0.51</b><br><b>(0.46-0.55)</b>                      | <b>0.55</b><br><b>(0.49-0.62)</b> | <b>0.82</b><br><b>(0.77-0.86)</b>                   | <b>0.85</b><br><b>(0.80-0.90)</b> | <b>0.36</b><br><b>(0.30-0.44)</b>                    | <b>0.34</b><br><b>(0.27-0.42)</b> |
| <b>High Acculturation</b><br>(n=6,141)             | <b>0.59</b><br><b>(0.50-0.70)</b>                      | <b>0.69</b><br><b>(0.58-0.83)</b> | <b>0.76</b><br><b>(0.71-0.82)</b> | <b>0.81</b><br><b>(0.74-0.88)</b> | 0.88<br>(0.68-1.14)               | <b>0.69</b><br><b>(0.52-0.91)</b> | <b>0.57</b><br><b>(0.46-0.69)</b>                      | <b>0.70</b><br><b>(0.61-0.81)</b> | <b>0.47</b><br><b>(0.39-0.58)</b>                      | <b>0.59</b><br><b>(0.50-0.69)</b> | <b>0.83</b><br><b>(0.75-0.92)</b>                   | <b>0.90</b><br><b>(0.83-0.98)</b> | <b>0.30</b><br><b>(0.19-0.47)</b>                    | <b>0.40</b><br><b>(0.29-0.57)</b> |
| <b>Medium/Low Acculturation</b><br>(n=9,666)       | <b>0.38</b><br><b>(0.31-0.46)</b>                      | <b>0.54</b><br><b>(0.45-0.64)</b> | <b>0.57</b><br><b>(0.53-0.62)</b> | <b>0.73</b><br><b>(0.66-0.80)</b> | 0.81<br>(0.66-1.00)               | <b>0.61</b><br><b>(0.49-0.75)</b> | <b>0.53</b><br><b>(0.43-0.66)</b>                      | <b>0.58</b><br><b>(0.50-0.67)</b> | <b>0.44</b><br><b>(0.36-0.53)</b>                      | <b>0.52</b><br><b>(0.44-0.60)</b> | <b>0.71</b><br><b>(0.64-0.79)</b>                   | <b>0.78</b><br><b>(0.72-0.85)</b> | <b>0.45</b><br><b>(0.31-0.67)</b>                    | <b>0.29</b><br><b>(0.21-0.39)</b> |
| <b>Puerto Rican</b>                                |                                                        |                                   |                                   |                                   |                                   |                                   |                                                        |                                   |                                                        |                                   |                                                     |                                   |                                                      |                                   |
| <b>U.S.-born (yes)</b><br>(n=2,544)                | <b>1.33</b><br><b>(1.08-1.63)</b>                      | <b>1.53</b><br><b>(1.30-1.81)</b> | <b>1.21</b><br><b>(1.11-1.33)</b> | <b>1.24</b><br><b>(1.15-1.35)</b> | 1.26<br>(0.89-1.77)               | 0.94<br>(0.66-1.33)               | 1.04<br>(0.90-1.21)                                    | 1.14<br>(0.98-1.33)               | 0.97<br>(0.85-1.11)                                    | 0.91<br>(0.78-1.05)               | 1.00<br>(0.92-1.09)                                 | <b>1.10</b><br><b>(1.01-1.20)</b> | 0.96<br>(0.76-1.19)                                  | 0.97<br>(0.73-1.30)               |
| <b>High Acculturation</b><br>(n=2,359)             | <b>1.36</b><br><b>(1.11-1.68)</b>                      | <b>1.59</b><br><b>(1.34-1.89)</b> | <b>1.22</b><br><b>(1.11-1.34)</b> | <b>1.26</b><br><b>(1.16-1.37)</b> | 1.32<br>(0.93-1.86)               | 0.98<br>(0.68-1.40)               | 0.93<br>(0.72-1.21)                                    | 1.17<br>(1.00-1.38)               | 1.08<br>(0.84-1.39)                                    | 0.92<br>(0.79-1.07)               | 0.92<br>(0.79-1.06)                                 | <b>1.11</b><br><b>(1.02-1.22)</b> | 1.00<br>(0.69-1.44)                                  | 1.00<br>(0.74-1.35)               |
| <b>Medium/Low Acculturation</b><br>(n=184)         | 0.79<br>(0.36-1.74)                                    | 0.89<br>(0.56-1.42)               | 1.17<br>(0.83-1.65)               | 1.01<br>(0.73-1.40)               | 0.48<br>(0.10-2.30)               | 0.51<br>(0.19-1.31)               | 0.72<br>(0.32-1.66)                                    | 0.61<br>(0.32-1.16)               | 0.74<br>(0.35-1.54)                                    | 0.75<br>(0.39-1.44)               | <b>0.36</b><br><b>(0.16-0.81)</b>                   | 0.87<br>(0.55-1.39)               | 0.52<br>(0.10-2.77)                                  | 0.60<br>(0.17-2.10)               |
| <b>U.S.-born (no)</b><br>(n=2,533)                 | <b>1.29</b><br><b>(1.03-1.61)</b>                      | <b>1.36</b><br><b>(1.17-1.58)</b> | <b>1.15</b><br><b>(1.04-1.27)</b> | <b>1.16</b><br><b>(1.06-1.26)</b> | 0.89<br>(0.63-1.26)               | 0.96<br>(0.72-1.28)               | 1.05<br>(0.91-1.21)                                    | 1.01<br>(0.86-1.18)               | 0.84<br>(0.73-0.97)                                    | <b>0.82</b><br><b>(0.70-0.97)</b> | 0.95<br>(0.86-1.04)                                 | 0.96<br>(0.85-1.08)               | 1.01<br>(0.83-1.24)                                  | 1.08<br>(0.86-1.35)               |
| <b>High Acculturation</b><br>(n=1,773)             | <b>1.48</b><br><b>(1.16-1.90)</b>                      | <b>1.37</b><br><b>(1.14-1.64)</b> | 1.14<br>(1.00-1.30)               | <b>1.20</b><br><b>(1.09-1.33)</b> | 1.06<br>(0.72-1.57)               | 0.97<br>(0.69-1.37)               | 1.14<br>(0.85-1.52)                                    | 1.06<br>(0.88-1.28)               | 0.98<br>(0.76-1.26)                                    | 0.87<br>(0.72-1.05)               | 1.02<br>(0.88-1.20)                                 | 1.00<br>(0.87-1.14)               | 0.97<br>(0.62-1.52)                                  | 1.14<br>(0.88-1.48)               |

|                                           |                                   |                                   |                                   |                     |                                   |                                   |                                   |                                   |                                   |                                   |                                   |                     |                                   |                                   |
|-------------------------------------------|-----------------------------------|-----------------------------------|-----------------------------------|---------------------|-----------------------------------|-----------------------------------|-----------------------------------|-----------------------------------|-----------------------------------|-----------------------------------|-----------------------------------|---------------------|-----------------------------------|-----------------------------------|
| <b>Medium/Low Acculturation (n=755)</b>   | 0.81<br>(0.48-1.37)               | <b>1.32</b><br><b>(1.07-1.64)</b> | 1.15<br>(0.95-1.40)               | 1.05<br>(0.91-1.22) | 0.57<br>(0.30-1.07)               | 0.96<br>(0.60-1.53)               | 1.16<br>(0.76-1.77)               | 0.86<br>(0.64-1.16)               | <b>0.60</b><br><b>(0.38-0.95)</b> | <b>0.69</b><br><b>(0.50-0.95)</b> | 0.73<br>(0.53-1.01)               | 0.84<br>(0.69-1.02) | 0.87<br>(0.41-1.86)               | 0.92<br>(0.63-1.36)               |
| <b>Cuban</b>                              |                                   |                                   |                                   |                     |                                   |                                   |                                   |                                   |                                   |                                   |                                   |                     |                                   |                                   |
| <b>U.S.-born Cuban (yes) (n=559)</b>      | 0.78<br>(0.44-1.39)               | 1.08<br>(0.74-1.58)               | 1.01<br>(0.81-1.25)               | 1.08<br>(0.89-1.31) | 0.49<br>(0.18-1.29)               | 0.95<br>(0.39-2.31)               | 0.95<br>(0.70-1.28)               | 0.96<br>(0.66-1.39)               | 0.92<br>(0.69-1.23)               | 0.83<br>(0.53-1.31)               | 0.96<br>(0.80-1.16)               | 1.07<br>(0.86-1.34) | 0.95<br>(0.54-1.66)               | 1.37<br>(0.78-2.42)               |
| <b>High Acculturation (n=440)</b>         | 0.89<br>(0.49-1.62)               | 1.16<br>(0.79-1.71)               | 1.08<br>(0.86-1.35)               | 1.05<br>(0.85-1.30) | <b>0.29</b><br><b>(0.09-0.96)</b> | 1.06<br>(0.38-2.97)               | 1.34<br>(0.85-2.10)               | 1.17<br>(0.82-1.67)               | 1.24<br>(0.82-1.88)               | 0.84<br>(0.54-1.29)               | 0.93<br>(0.68-1.28)               | 1.03<br>(0.78-1.36) | 0.53<br>(0.17-1.64)               | 1.30<br>(0.71-2.38)               |
| <b>Medium/Low Acculturation (n=119)</b>   | 0.37<br>(0.11-1.22)               | 0.72<br>(0.21-2.46)               | 0.69<br>(0.40-1.20)               | 1.21<br>(0.71-2.06) | 0.88<br>(0.20-3.91)               | 0.63<br>(0.16-2.51)               | NE                                | 0.27<br>(0.06-1.23)               | 0.28<br>(0.06-1.40)               | 0.82<br>(0.29-2.28)               | 0.76<br>(0.38-1.51)               | 1.21<br>(0.90-1.62) | 0.25<br>(0.03-1.90)               | 1.65<br>(0.39-6.94)               |
| <b>U.S.-born Cuban (no) (n=1,959)</b>     | 0.75<br>(0.56-1.00)               | 0.90<br>(0.69-1.18)               | <b>0.78</b><br><b>(0.67-0.91)</b> | 0.94<br>(0.82-1.07) | 0.78<br>(0.57-1.05)               | <b>0.55</b><br><b>(0.35-0.87)</b> | <b>0.69</b><br><b>(0.52-0.92)</b> | <b>0.71</b><br><b>(0.52-0.98)</b> | <b>0.61</b><br><b>(0.48-0.78)</b> | <b>0.68</b><br><b>(0.50-0.94)</b> | <b>0.87</b><br><b>(0.77-0.97)</b> | 0.95<br>(0.80-1.13) | <b>0.59</b><br><b>(0.42-0.83)</b> | <b>0.60</b><br><b>(0.40-0.89)</b> |
| <b>High Acculturation (n=571)</b>         | 0.90<br>(0.54-1.51)               | 1.13<br>(0.70-1.82)               | 0.91<br>(0.68-1.22)               | 1.09<br>(0.89-1.34) | 0.87<br>(0.48-1.58)               | 0.63<br>(0.30-1.34)               | 1.08<br>(0.64-1.82)               | 1.04<br>(0.68-1.59)               | <b>0.58</b><br><b>(0.36-0.91)</b> | 0.95<br>(0.62-1.46)               | 0.75<br>(0.53-1.04)               | 0.89<br>(0.65-1.23) | 0.93<br>(0.43-2.01)               | 0.61<br>(0.30-1.25)               |
| <b>Medium/Low Acculturation (n=1,386)</b> | <b>0.68</b><br><b>(0.50-0.93)</b> | 0.82<br>(0.58-1.16)               | <b>0.71</b><br><b>(0.61-0.84)</b> | 0.87<br>(0.74-1.03) | 0.71<br>(0.49-1.01)               | <b>0.53</b><br><b>(0.30-0.94)</b> | <b>0.52</b><br><b>(0.31-0.89)</b> | <b>0.64</b><br><b>(0.42-0.95)</b> | <b>0.56</b><br><b>(0.39-0.80)</b> | <b>0.61</b><br><b>(0.40-0.92)</b> | 0.84<br>(0.68-1.04)               | 1.00<br>(0.84-1.21) | <b>0.46</b><br><b>(0.26-0.80)</b> | <b>0.60</b><br><b>(0.37-0.98)</b> |
| <b>Dominican</b>                          |                                   |                                   |                                   |                     |                                   |                                   |                                   |                                   |                                   |                                   |                                   |                     |                                   |                                   |
| <b>U.S.-born (yes) (n=264)</b>            | 1.13<br>(0.60-2.11)               | 1.02<br>(0.58-1.79)               | 0.86<br>(0.60-1.23)               | 1.32<br>(0.98-1.77) | 0.96<br>(0.30-3.07)               | 1.35<br>(0.48-3.80)               | 0.73<br>(0.48-1.12)               | 0.62<br>(0.36-1.07)               | 0.97<br>(0.65-1.44)               | 0.91<br>(0.53-1.57)               | 0.99<br>(0.78-1.26)               | 0.93<br>(0.68-1.29) | 0.64<br>(0.31-1.30)               | 0.57<br>(0.23-1.43)               |
| <b>High Acculturation (n=208)</b>         | 1.30<br>(0.67-2.55)               | 1.00<br>(0.54-1.08)               | 0.94<br>(0.64-1.38)               | 1.38<br>(1.00-1.90) | 1.32<br>(0.40-4.36)               | 1.36<br>(0.42-4.40)               | 1.01<br>(0.58-1.76)               | 0.62<br>(0.34-1.15)               | 1.12<br>(0.47-2.67)               | 0.79<br>(0.41-1.50)               | 1.10<br>(0.76-1.60)               | 0.90<br>(0.63-1.30) | 0.80<br>(0.26-2.47)               | 0.56<br>(0.20-1.56)               |
| <b>Medium/Low Acculturation (n=56)</b>    | 0.63<br>(0.12-3.25)               | 1.11<br>(0.34-3.57)               | 0.58<br>(0.23-1.47)               | 1.05<br>(0.56-1.97) | 0.23<br>(0.03-1.74)               | 1.30<br>(0.19-8.81)               | NE                                | 0.62<br>(0.22-1.79)               | NE                                | 1.42<br>(0.69-2.94)               | 0.47<br>(0.11-1.96)               | 1.06<br>(0.61-1.84) | NE                                | 0.62<br>(0.08-4.72)               |
| <b>U.S.-born (no) (n=1,394)</b>           | 0.74<br>(0.52-1.04)               | 0.95<br>(0.78-1.15)               | 0.82<br>(0.69-0.97)               | 0.92<br>(0.81-1.04) | 1.08<br>(0.63-1.85)               | <b>0.29</b><br><b>(0.15-0.53)</b> | <b>0.78</b><br><b>(0.63-0.97)</b> | 0.88<br>(0.69-1.12)               | <b>0.62</b><br><b>(0.49-0.80)</b> | <b>0.74</b><br><b>(0.57-0.97)</b> | 0.92<br>(0.79-1.08)               | 0.96<br>(0.83-1.13) | 0.86<br>(0.55-1.34)               | 1.00<br>(0.61-1.63)               |
| <b>High Acculturation (n=594)</b>         | 0.89<br>(0.56-1.39)               | 0.88<br>(0.63-1.24)               | 0.94<br>(0.75-1.18)               | 0.92<br>(0.76-1.11) | 1.51<br>(0.67-3.40)               | <b>0.15</b><br><b>(0.06-0.35)</b> | 0.79<br>(0.44-1.40)               | 0.81<br>(0.54-1.22)               | 0.62<br>(0.31-1.21)               | 0.73<br>(0.48-1.11)               | 0.72<br>(0.51-1.00)               | 0.96<br>(0.75-1.23) | 0.67<br>(0.21-2.10)               | 0.85<br>(0.43-1.70)               |
| <b>Medium/Low Acculturation (n=800)</b>   | 0.63<br>(0.38-1.03)               | 0.98<br>(0.76-1.26)               | <b>0.72</b><br><b>(0.55-0.93)</b> | 0.91<br>(0.79-1.06) | 0.90<br>(0.41-1.94)               | <b>0.36</b><br><b>(0.17-0.74)</b> | <b>0.34</b><br><b>(0.18-0.65)</b> | 0.94<br>(0.71-1.25)               | <b>0.22</b><br><b>(0.11-0.44)</b> | 0.76<br>(0.56-1.03)               | 0.96<br>(0.67-1.37)               | 0.97<br>(0.78-1.21) | 0.38<br>(0.12-1.13)               | 1.13<br>(0.60-2.11)               |
| <b>Central/South American</b>             |                                   |                                   |                                   |                     |                                   |                                   |                                   |                                   |                                   |                                   |                                   |                     |                                   |                                   |
| <b>U.S.-born (yes) (n=1,113)</b>          | 1.31<br>(0.92-1.87)               | 1.31<br>(0.96-1.77)               | 1.25<br>(1.08-1.45)               | 1.10<br>(0.92-1.30) | 0.64<br>(0.35-1.16)               | 0.95<br>(0.52-1.74)               | 1.21<br>(0.96-1.53)               | <b>1.40</b><br><b>(1.06-1.86)</b> | 0.97<br>(0.73-1.30)               | 1.13<br>(0.80-1.61)               | 1.05<br>(0.92-1.20)               | 1.13<br>(0.97-1.32) | 0.64<br>(0.38-1.10)               | <b>0.47</b><br><b>(0.24-0.94)</b> |
| <b>High Acculturation (n=994)</b>         | 1.40<br>(0.97-2.04)               | <b>1.42</b><br><b>(1.04-1.94)</b> | <b>1.30</b><br><b>(1.11-1.51)</b> | 1.15<br>(0.97-1.36) | 0.48<br>(0.22-1.07)               | 1.03<br>(0.53-2.00)               | 0.97<br>(0.64-1.47)               | <b>1.30</b><br><b>(1.04-1.63)</b> | 0.71<br>(0.46-1.10)               | 1.06<br>(0.82-1.37)               | 0.99<br>(0.80-1.23)               | 1.14<br>(1.00-1.30) | 1.01<br>(0.45-2.27)               | 0.44<br>(0.21-0.90)               |
| <b>Medium/Low Acculturation</b>           | 0.73<br>(0.29-1.83)               | 0.61<br>(0.22-1.69)               | 0.92<br>(0.51-1.64)               | 0.74<br>(0.36-1.52) | 1.26<br>(0.51-3.12)               | 0.52<br>(0.11-2.62)               | 0.86<br>(0.27-2.75)               | 1.90<br>(0.87-4.12)               | 0.89<br>(0.24-3.25)               | 1.50<br>(0.48-4.75)               | 0.60<br>(0.28-1.32)               | 1.07<br>(0.61-1.87) | 0.43<br>(0.06-3.19)               | 0.66<br>(0.11-3.91)               |

|                                                   |                            |                            |                            |                            |                            |                            |                            |                            |                            |                            |                            |                            |                            |                            |
|---------------------------------------------------|----------------------------|----------------------------|----------------------------|----------------------------|----------------------------|----------------------------|----------------------------|----------------------------|----------------------------|----------------------------|----------------------------|----------------------------|----------------------------|----------------------------|
| (n=119)                                           |                            |                            |                            |                            |                            |                            |                            |                            |                            |                            |                            |                            |                            |                            |
| <b>U.S.-born<br/>(no) (n=7,049)</b>               | <b>0.64</b><br>(0.54-0.76) | <b>0.80</b><br>(0.70-0.93) | <b>0.88</b><br>(0.82-0.94) | <b>0.92</b><br>(0.85-0.98) | <b>0.66</b><br>(0.47-0.94) | <b>0.67</b><br>(0.52-0.87) | <b>0.69</b><br>(0.60-0.78) | <b>0.71</b><br>(0.61-0.83) | <b>0.60</b><br>(0.53-0.68) | <b>0.66</b><br>(0.57-0.77) | <b>0.85</b><br>(0.80-0.91) | <b>0.92</b><br>(0.85-0.99) | <b>0.40</b><br>(0.31-0.51) | <b>0.46</b><br>(0.34-0.62) |
| <b>High Acculturation<br/>(n=3,366)</b>           | <b>0.72</b><br>(0.57-0.91) | <b>0.79</b><br>(0.63-0.98) | 0.94<br>(0.85-1.04)        | 0.91<br>(0.82-1.02)        | 0.77<br>(0.50-1.17)        | 0.76<br>(0.53-1.11)        | <b>0.66</b><br>(0.50-0.88) | <b>0.80</b><br>(0.64-0.98) | <b>0.57</b><br>(0.42-0.76) | <b>0.74</b><br>(0.61-0.89) | <b>0.75</b><br>(0.65-0.86) | 0.96<br>(0.87-1.06)        | <b>0.38</b><br>(0.22-0.67) | <b>0.52</b><br>(0.36-0.76) |
| <b>Medium/Low<br/>Acculturation<br/>(n=3,664)</b> | <b>0.56</b><br>(0.45-0.72) | <b>0.82</b><br>(0.68-0.98) | <b>0.80</b><br>(0.72-0.89) | 0.92<br>(0.84-1.00)        | <b>0.58</b><br>(0.34-0.98) | <b>0.59</b><br>(0.42-0.84) | <b>0.60</b><br>(0.43-0.84) | <b>0.63</b><br>(0.51-0.79) | <b>0.44</b><br>(0.32-0.61) | <b>0.59</b><br>(0.47-0.74) | <b>0.80</b><br>(0.67-0.94) | <b>0.87</b><br>(0.77-0.97) | <b>0.19</b><br>(0.09-0.38) | <b>0.40</b><br>(0.26-0.63) |

Abbreviations: ref (reference); NE (non-estimable)

\* Language acculturation categories include high (English only interview) and medium/low (English and Spanish interview or Spanish only interview).

Adjusted for age (18-30, 31-49, 50-64, 65+ years), annual household income (<\$35,000, \$35,000-\$74,999, \$75,000+), educational attainment (<high school, high school graduate, some college, ≥college), unemployed/not in the labor force (yes, no), occupational class (professional/management, support services, laborers), marital/cohabitating status (married/cohabitating, divorced/widowed, single), region of residence (Northeast, Midwest, South, West), heavy alcohol consumption (≥2 drinks/day for women and ≥3 drinks/day for men), serious psychological distress (Kessler-6 psychological distress scale score ≥13), “ideal” cardiovascular health (never smoking/quit >12 months prior to interview, BMI <25 kg/m<sup>2</sup>, meeting physical activity guidelines, and no prior diagnosis of dyslipidemia, hypertension, or diabetes/prediabetes), and cancer.

Note. All estimates are weighted for the survey’s complex sampling design. Trouble falling asleep, trouble staying asleep, sleep medication use, and restorative sleep were measured during the survey years 2013-2017.

**Supplemental Table 10. Fully-Adjusted Prevalence Ratios of Sleep Characteristics for Hispanic/Latino Heritage Groups compared to non-Hispanic Whites by Language Acculturation Status\*, Stratified by Age Group, National Health Interview Survey, 2004-2017 (N=245,812)**

| Group (n)                                   | Prevalence Ratio (95% Confidence Interval)             |                                     |                                     |                                     |                                     |                                     |                                 |                                     |                                     |                                                        |                                     |                                     |                                                        |                                     |                                     |                                                     |                                     |                                     |                                                      |                                     |                                     |
|---------------------------------------------|--------------------------------------------------------|-------------------------------------|-------------------------------------|-------------------------------------|-------------------------------------|-------------------------------------|---------------------------------|-------------------------------------|-------------------------------------|--------------------------------------------------------|-------------------------------------|-------------------------------------|--------------------------------------------------------|-------------------------------------|-------------------------------------|-----------------------------------------------------|-------------------------------------|-------------------------------------|------------------------------------------------------|-------------------------------------|-------------------------------------|
|                                             | Sleep Duration<br>(reference: recommended (7-9 hours)) |                                     |                                     |                                     |                                     |                                     |                                 |                                     |                                     | Sleep Quality in the Past Week                         |                                     |                                     |                                                        |                                     |                                     |                                                     |                                     |                                     |                                                      |                                     |                                     |
|                                             | Very Short<br>(≤5-hours)<br>(n=17,112)                 |                                     |                                     | Short<br>(<7-hours)<br>(n=61,091)   |                                     |                                     | Long<br>(>9-hours)<br>(n=7,604) |                                     |                                     | Trouble Falling<br>Asleep<br>(≥3 nights)<br>(n=18,607) |                                     |                                     | Trouble Staying<br>Asleep<br>(≥3 nights)<br>(n=26,493) |                                     |                                     | Non-restorative<br>Sleep<br>(≥3 days)<br>(n=38,369) |                                     |                                     | Sleep Medication<br>Use<br>(≥3 nights)<br>(n=10,024) |                                     |                                     |
| Age (years) Group                           | 18-30                                                  | 31-49                               | 50+                                 | 18-30                               | 31-49                               | 50+                                 | 18-30                           | 31-49                               | 50+                                 | 18-30                                                  | 31-49                               | 50+                                 | 18-30                                                  | 31-49                               | 50+                                 | 18-30                                               | 31-49                               | 50+                                 | 18-30                                                | 31-49                               | 50+                                 |
| U.S.-born Non-Hispanic White<br>(n=198,297) | Ref                                                    | Ref                                 | Ref                                 | Ref                                 | Ref                                 | Ref                                 | Ref                             | Ref                                 | Ref                                 | Ref                                                    | Ref                                 | Ref                                 | Ref                                                    | Ref                                 | Ref                                 | Ref                                                 | Ref                                 | Ref                                 | Ref                                                  | Ref                                 | Ref                                 |
| <b>Mexican</b>                              |                                                        |                                     |                                     |                                     |                                     |                                     |                                 |                                     |                                     |                                                        |                                     |                                     |                                                        |                                     |                                     |                                                     |                                     |                                     |                                                      |                                     |                                     |
| U.S.-born (yes)<br>(n=14,282)               | 1.03<br>(0.90-1.18)                                    | 1.03<br>(0.91-1.15)                 | <b>1.14</b><br>( <b>1.01-1.27</b> ) | 1.00<br>(0.93-1.06)                 | <b>1.09</b><br>( <b>1.03-1.15</b> ) | 1.06<br>(0.99-1.13)                 | 1.04<br>(0.85-1.26)             | 0.85<br>(0.67-1.09)                 | 0.96<br>(0.81-1.13)                 | 0.96<br>(0.89-1.03)                                    | <b>0.81</b><br>( <b>0.73-0.91</b> ) | 1.01<br>(0.90-1.15)                 | <b>0.77</b><br>( <b>0.71-0.82</b> )                    | <b>0.73</b><br>( <b>0.65-0.82</b> ) | <b>0.84</b><br>( <b>0.75-0.95</b> ) | 1.02<br>(0.98-1.06)                                 | 0.96<br>(0.91-1.03)                 | 1.00<br>(0.92-1.09)                 | <b>0.61</b><br>( <b>0.53-0.70</b> )                  | <b>0.64</b><br>( <b>0.51-0.80</b> ) | <b>0.64</b><br>( <b>0.54-0.76</b> ) |
| High Acculturation<br>(n=13,075)            | 1.07<br>(0.93-1.23)                                    | 1.03<br>(0.92-1.16)                 | <b>1.18</b><br>( <b>1.05-1.33</b> ) | 1.04<br>(0.97-1.11)                 | <b>1.09</b><br>( <b>1.04-1.15</b> ) | <b>1.09</b><br>( <b>1.02-1.17</b> ) | 1.03<br>(0.84-1.27)             | 0.86<br>(0.67-1.10)                 | 0.98<br>(0.82-1.17)                 | 1.02<br>(0.89-1.17)                                    | <b>0.83</b><br>( <b>0.74-0.94</b> ) | 1.03<br>(0.91-1.17)                 | 0.89<br>(0.76-1.04)                                    | <b>0.76</b><br>( <b>0.67-0.85</b> ) | <b>0.87</b><br>( <b>0.77-0.97</b> ) | 1.02<br>(0.94-1.09)                                 | 0.97<br>(0.91-1.03)                 | 1.03<br>(0.94-1.13)                 | 0.87<br>(0.60-1.25)                                  | <b>0.65</b><br>( <b>0.52-0.83</b> ) | <b>0.65</b><br>( <b>0.54-0.77</b> ) |
| Medium/Low Acculturation<br>(n=1,188)       | 0.77<br>(0.54-1.10)                                    | 0.95<br>(0.67-1.35)                 | 0.69<br>(0.42-1.14)                 | <b>0.72</b><br>( <b>0.59-0.88</b> ) | 1.00<br>(0.83-1.21)                 | <b>0.64</b><br>( <b>0.49-0.86</b> ) | 1.00<br>(0.62-1.60)             | 0.79<br>(0.30-2.11)                 | 0.83<br>(0.59-1.15)                 | <b>0.64</b><br>( <b>0.41-0.99</b> )                    | <b>0.49</b><br>( <b>0.28-0.88</b> ) | 0.78<br>(0.51-1.18)                 | <b>0.47</b><br>( <b>0.27-0.81</b> )                    | <b>0.31</b><br>( <b>0.16-0.59</b> ) | <b>0.57</b><br>( <b>0.38-0.84</b> ) | 0.82<br>(0.67-1.01)                                 | 0.88<br>(0.71-1.09)                 | <b>0.61</b><br>( <b>0.41-0.89</b> ) | <b>0.08</b><br>( <b>0.01-0.60</b> )                  | 0.38<br>(0.12-1.19)                 | 0.58<br>(0.30-1.10)                 |
| U.S.-born (no)<br>(n=15,818)                | <b>0.43</b><br>( <b>0.34-0.54</b> )                    | <b>0.48</b><br>( <b>0.41-0.55</b> ) | <b>0.82</b><br>( <b>0.68-0.98</b> ) | <b>0.67</b><br>( <b>0.61-0.74</b> ) | <b>0.69</b><br>( <b>0.65-0.74</b> ) | <b>0.86</b><br>( <b>0.79-0.93</b> ) | 0.81<br>(0.62-1.06)             | <b>0.65</b><br>( <b>0.51-0.82</b> ) | <b>0.76</b><br>( <b>0.63-0.92</b> ) | <b>0.63</b><br>( <b>0.58-0.69</b> )                    | <b>0.54</b><br>( <b>0.46-0.62</b> ) | <b>0.80</b><br>( <b>0.69-0.93</b> ) | <b>0.51</b><br>( <b>0.47-0.56</b> )                    | <b>0.46</b><br>( <b>0.40-0.52</b> ) | <b>0.57</b><br>( <b>0.50-0.65</b> ) | <b>0.86</b><br>( <b>0.82-0.91</b> )                 | <b>0.79</b><br>( <b>0.74-0.85</b> ) | <b>0.85</b><br>( <b>0.77-0.94</b> ) | <b>0.36</b><br>( <b>0.29-0.43</b> )                  | <b>0.22</b><br>( <b>0.15-0.32</b> ) | <b>0.57</b><br>( <b>0.44-0.75</b> ) |
| High Acculturation<br>(n=6,141)             | <b>0.62</b><br>( <b>0.48-0.81</b> )                    | <b>0.55</b><br>( <b>0.46-0.65</b> ) | 0.98<br>(0.76-1.25)                 | <b>0.79</b><br>( <b>0.70-0.90</b> ) | <b>0.76</b><br>( <b>0.70-0.81</b> ) | 0.92<br>(0.82-1.03)                 | 0.80<br>(0.57-1.13)             | <b>0.65</b><br>( <b>0.46-0.92</b> ) | 0.91<br>(0.66-1.25)                 | <b>0.63</b><br>( <b>0.50-0.80</b> )                    | <b>0.57</b><br>( <b>0.47-0.69</b> ) | 0.86<br>(0.69-1.08)                 | <b>0.68</b><br>( <b>0.52-0.90</b> )                    | <b>0.48</b><br>( <b>0.40-0.57</b> ) | <b>0.57</b><br>( <b>0.46-0.69</b> ) | 1.06<br>(0.94-1.20)                                 | <b>0.83</b><br>( <b>0.76-0.90</b> ) | 0.86<br>(0.74-1.00)                 | <b>0.22</b><br>( <b>0.08-0.60</b> )                  | <b>0.26</b><br>( <b>0.17-0.41</b> ) | <b>0.58</b><br>( <b>0.40-0.84</b> ) |
| Medium/Low Acculturation<br>(n=9,666)       | <b>0.29</b><br>( <b>0.20-0.41</b> )                    | <b>0.41</b><br>( <b>0.34-0.49</b> ) | <b>0.74</b><br>( <b>0.58-0.94</b> ) | <b>0.56</b><br>( <b>0.48-0.65</b> ) | <b>0.62</b><br>( <b>0.56-0.68</b> ) | <b>0.82</b><br>( <b>0.74-0.91</b> ) | 0.80<br>(0.58-1.10)             | <b>0.64</b><br>( <b>0.49-0.83</b> ) | <b>0.69</b><br>( <b>0.55-0.87</b> ) | <b>0.45</b><br>( <b>0.32-0.64</b> )                    | <b>0.50</b><br>( <b>0.41-0.60</b> ) | <b>0.77</b><br>( <b>0.64-0.93</b> ) | <b>0.46</b><br>( <b>0.32-0.68</b> )                    | <b>0.44</b><br>( <b>0.37-0.52</b> ) | <b>0.57</b><br>( <b>0.48-0.67</b> ) | <b>0.79</b><br>( <b>0.66-0.96</b> )                 | <b>0.75</b><br>( <b>0.68-0.82</b> ) | <b>0.84</b><br>( <b>0.74-0.95</b> ) | 0.27<br>(0.07-1.02)                                  | <b>0.19</b><br>( <b>0.12-0.31</b> ) | <b>0.56</b><br>( <b>0.40-0.80</b> ) |
| <b>Puerto Rican</b>                         |                                                        |                                     |                                     |                                     |                                     |                                     |                                 |                                     |                                     |                                                        |                                     |                                     |                                                        |                                     |                                     |                                                     |                                     |                                     |                                                      |                                     |                                     |
| U.S.-born (yes)<br>(n=2,544)                | <b>1.53</b><br>( <b>1.19-1.96</b> )                    | <b>1.47</b><br>( <b>1.24-1.74</b> ) | <b>1.55</b><br>( <b>1.17-2.06</b> ) | <b>1.26</b><br>( <b>1.12-1.42</b> ) | <b>1.25</b><br>( <b>1.15-1.36</b> ) | <b>1.28</b><br>( <b>1.11-1.48</b> ) | 1.36<br>(0.97-1.91)             | 1.00<br>(0.66-1.54)                 | 0.64<br>(0.35-1.19)                 | 1.14<br>(0.99-1.31)                                    | 0.93<br>(0.75-1.14)                 | <b>1.49</b><br>( <b>1.20-1.86</b> ) | 0.98<br>(0.85-1.12)                                    | 1.02<br>(0.82-1.25)                 | 1.01<br>(0.79-1.28)                 | 1.08<br>(0.99-1.18)                                 | 0.99<br>(0.87-1.12)                 | 1.11<br>(0.94-1.31)                 | 0.93<br>(0.74-1.17)                                  | 0.79<br>(0.52-1.19)                 | 1.25<br>(0.92-1.69)                 |
| High Acculturation<br>(n=2,359)             | <b>1.50</b><br>( <b>1.17-1.94</b> )                    | <b>1.52</b><br>( <b>1.28-1.81</b> ) | <b>1.71</b><br>( <b>1.28-2.30</b> ) | <b>1.25</b><br>( <b>1.10-1.42</b> ) | <b>1.25</b><br>( <b>1.14-1.36</b> ) | <b>1.35</b><br>( <b>1.17-1.55</b> ) | 1.40<br>(0.99-1.97)             | 1.03<br>(0.66-1.61)                 | 0.73<br>(0.40-1.34)                 | 1.02<br>(0.78-1.33)                                    | 0.94<br>(0.75-1.17)                 | <b>1.58</b><br>( <b>1.27-1.97</b> ) | 0.89<br>(0.62-1.28)                                    | 1.01<br>(0.81-1.26)                 | 1.07<br>(0.84-1.36)                 | 1.04<br>(0.91-1.20)                                 | 1.01<br>(0.89-1.14)                 | 1.17<br>(0.99-1.38)                 | 0.81<br>(0.41-1.60)                                  | 0.81<br>(0.53-1.23)                 | 1.32<br>(0.97-1.78)                 |
| Medium/Low Acculturation<br>(n=184)         | <b>1.88</b><br>( <b>1.07-3.31</b> )                    | 0.64<br>(0.27-1.51)                 | 0.55<br>(0.25-1.18)                 | 1.38<br>(0.93-2.05)                 | 1.25<br>(0.93-1.68)                 | 0.71<br>(0.34-1.47)                 | 0.78<br>(0.24-2.52)             | 0.75<br>(0.25-2.24)                 | NE                                  | NE                                                     | 0.73<br>(0.36-1.49)                 | 0.80<br>(0.35-1.84)                 | 0.44<br>(0.06-3.38)                                    | 1.08<br>(0.58-2.01)                 | 0.54<br>(0.23-1.23)                 | 0.36<br>(0.07-1.79)                                 | 0.68<br>(0.38-1.23)                 | 0.67<br>(0.33-1.38)                 | NE                                                   | 0.45<br>(0.09-2.24)                 | 0.67<br>(0.18-2.52)                 |
| U.S.-born (no)                              | 1.27                                                   | 1.08                                | <b>1.56</b>                         | <b>1.23</b>                         | 1.01                                | <b>1.26</b>                         | 1.03                            | 0.75                                | 0.96                                | 1.09                                                   | 0.95                                | <b>1.27</b>                         | <b>0.86</b>                                            | 0.77                                | 0.87                                | 0.98                                                | 0.94                                | 1.00                                | 1.04                                                 | 0.90                                | 1.08                                |



|                                              |                                   |                                   |                     |                                   |                                   |                                   |                     |                                   |                                   |                                   |                                   |                                   |                                   |                                   |                                   |                                   |                                   |                     |                                   |                                   |                                   |
|----------------------------------------------|-----------------------------------|-----------------------------------|---------------------|-----------------------------------|-----------------------------------|-----------------------------------|---------------------|-----------------------------------|-----------------------------------|-----------------------------------|-----------------------------------|-----------------------------------|-----------------------------------|-----------------------------------|-----------------------------------|-----------------------------------|-----------------------------------|---------------------|-----------------------------------|-----------------------------------|-----------------------------------|
| (n=2,533)                                    | (0.86-1.87)                       | (0.85-1.38)                       | <b>(1.34-1.81)</b>  | <b>(1.01-1.51)</b>                | (0.90-1.14)                       | <b>(1.16-1.37)</b>                | (0.53-2.02)         | (0.47-1.18)                       | (0.74-1.25)                       | (0.94-1.25)                       | (0.73-1.22)                       | <b>(1.06-1.51)</b>                | <b>(0.75-0.99)</b>                | (0.58-1.02)                       | (0.73-1.03)                       | (0.88-1.08)                       | (0.80-1.10)                       | (0.87-1.14)         | (0.85-1.27)                       | (0.60-1.35)                       | (0.85-1.37)                       |
| <b>High Acculturation</b><br>(n=1,773)       | 1.25<br>(0.82-1.91)               | 1.05<br>(0.78-1.42)               | 1.85<br>(1.56-2.19) | 1.20<br>(0.94-1.53)               | 0.99<br>(0.86-1.14)               | <b>1.35</b><br><b>(1.23-1.48)</b> | 0.87<br>(0.35-2.21) | 0.91<br>(0.57-1.43)               | 1.09<br>(0.79-1.52)               | <b>0.51</b><br><b>(0.28-0.93)</b> | 0.95<br>(0.72-1.24)               | <b>1.41</b><br><b>(1.14-1.74)</b> | 0.99<br>(0.63-1.56)               | 0.82<br>(0.60-1.12)               | 0.98<br>(0.81-1.18)               | 0.98<br>(0.71-1.35)               | 1.05<br>(0.91-1.22)               | 1.01<br>(0.86-1.20) | 0.73<br>(0.21-2.53)               | 1.06<br>(0.69-1.64)               | 1.09<br>(0.82-1.46)               |
| <b>Medium/Low Acculturation</b><br>(n=755)   | 1.31<br>(0.62-2.79)               | 1.16<br>(0.78-1.72)               | 1.04<br>(0.84-1.29) | 1.33<br>(0.99-1.78)               | 1.08<br>(0.87-1.32)               | 1.08<br>(0.92-1.27)               | 1.48<br>(0.66-3.36) | <b>0.28</b><br><b>(0.08-0.94)</b> | 0.76<br>(0.48-1.20)               | 1.25<br>(0.60-2.60)               | 0.93<br>(0.51-1.68)               | 0.97<br>(0.70-1.36)               | 1.19<br>(0.46-3.13)               | 0.62<br>(0.35-1.12)               | <b>0.61</b><br><b>(0.43-0.86)</b> | 0.74<br>(0.35-1.60)               | <b>0.62</b><br><b>(0.42-0.91)</b> | 0.95<br>(0.76-1.19) | 2.05<br>(0.61-6.90)               | <b>0.41</b><br><b>(0.19-0.86)</b> | 1.05<br>(0.66-1.67)               |
| <b>Cuban</b>                                 |                                   |                                   |                     |                                   |                                   |                                   |                     |                                   |                                   |                                   |                                   |                                   |                                   |                                   |                                   |                                   |                                   |                     |                                   |                                   |                                   |
| <b>U.S.-born Cuban (yes)</b><br>(n=559)      | 0.81<br>(0.47-1.42)               | 0.83<br>(0.49-1.41)               | 1.65<br>(0.93-2.94) | 0.98<br>(0.76-1.26)               | 1.11<br>(0.91-1.35)               | 1.04<br>(0.69-1.57)               | 0.93<br>(0.39-2.23) | 0.45<br>(0.14-1.41)               | 0.21<br>(0.03-1.53)               | 1.05<br>(0.78-1.41)               | 1.11<br>(0.72-1.71)               | 1.54<br>(0.85-2.78)               | 0.91<br>(0.68-1.22)               | 1.02<br>(0.68-1.53)               | 1.04<br>(0.62-1.75)               | 1.05<br>(0.87-1.26)               | 0.94<br>(0.72-1.24)               | 0.99<br>(0.61-1.63) | 0.91<br>(0.52-1.60)               | 1.53<br>(0.83-2.80)               | 0.63<br>(0.26-1.49)               |
| <b>High Acculturation</b><br>(n=440)         | 1.00<br>(0.56-1.77)               | 0.84<br>(0.47-1.50)               | 1.69<br>(0.92-3.10) | 1.01<br>(0.78-1.32)               | 1.12<br>(0.90-1.39)               | 1.06<br>(0.68-1.63)               | 1.06<br>(0.37-3.04) | 0.30<br>(0.07-1.21)               | 0.25<br>(0.04-1.82)               | 0.92<br>(0.55-1.53)               | 1.32<br>(0.86-2.03)               | 1.66<br>(0.90-3.06)               | 1.04<br>(0.57-1.90)               | 0.97<br>(0.62-1.54)               | 1.11<br>(0.64-1.90)               | 1.05<br>(0.80-1.40)               | 0.92<br>(0.67-1.26)               | 1.00<br>(0.59-1.70) | <b>0.10</b><br><b>(0.01-0.76)</b> | 1.45<br>(0.78-2.69)               | 0.63<br>(0.24-1.64)               |
| <b>Medium/Low Acculturation</b><br>(n=119)   | 0.22<br>(0.03-1.53)               | 0.81<br>(0.30-2.19)               | 1.13<br>(0.26-4.86) | 0.87<br>(0.42-1.82)               | 1.06<br>(0.69-1.61)               | 0.85<br>(0.25-2.91)               | 0.73<br>(0.17-3.17) | 1.02<br>(0.23-4.51)               | NE                                | NE                                | 0.30<br>(0.05-1.92)               | 0.50<br>(0.11-2.21)               | NE                                | 1.18<br>(0.51-2.74)               | 0.36<br>(0.07-2.00)               | 1.10<br>(0.63-1.93)               | 1.03<br>(0.66-1.63)               | 0.88<br>(0.27-2.90) | NE                                | 1.84<br>(0.48-7.11)               | 0.64<br>(0.14-2.89)               |
| <b>U.S.-born Cuban (no)</b><br>(n=1,959)     | 0.59<br>(0.24-1.43)               | <b>0.61</b><br><b>(0.44-0.84)</b> | 1.03<br>(0.81-1.31) | <b>0.48</b><br><b>(0.31-0.75)</b> | <b>0.67</b><br><b>(0.53-0.83)</b> | 1.06<br>(0.95-1.18)               | 0.32<br>(0.08-1.34) | 0.75<br>(0.42-1.34)               | <b>0.74</b><br><b>(0.56-0.96)</b> | <b>0.70</b><br><b>(0.53-0.93)</b> | <b>0.57</b><br><b>(0.35-0.95)</b> | 0.94<br>(0.74-1.20)               | <b>0.64</b><br><b>(0.50-0.81)</b> | <b>0.61</b><br><b>(0.41-0.90)</b> | <b>0.69</b><br><b>(0.54-0.89)</b> | <b>0.87</b><br><b>(0.78-0.97)</b> | <b>0.76</b><br><b>(0.64-0.89)</b> | 0.98<br>(0.83-1.16) | <b>0.62</b><br><b>(0.44-0.88)</b> | <b>0.30</b><br><b>(0.13-0.66)</b> | 0.77<br>(0.56-1.07)               |
| <b>High Acculturation</b><br>(n=571)         | 0.55<br>(0.16-1.91)               | 0.75<br>(0.44-1.28)               | 1.31<br>(0.82-2.09) | 0.55<br>(0.27-1.12)               | 0.87<br>(0.67-1.11)               | 1.18<br>(0.95-1.47)               | 0.91<br>(0.21-4.01) | 0.76<br>(0.21-2.83)               | 0.75<br>(0.45-1.26)               | NE                                | <b>0.38</b><br><b>(0.14-0.98)</b> | 1.66<br>(1.20-2.30)               | 0.20<br>(0.03-1.47)               | 0.58<br>(0.25-1.37)               | 0.85<br>(0.61-1.19)               | 0.66<br>(0.31-1.40)               | 0.65<br>(0.41-1.04)               | 0.95<br>(0.70-1.28) | NE                                | 0.16<br>(0.02-1.11)               | 1.03<br>(0.58-1.85)               |
| <b>Medium/Low Acculturation</b><br>(n=1,386) | 0.62<br>(0.20-1.92)               | <b>0.55</b><br><b>(0.37-0.82)</b> | 0.92<br>(0.71-1.19) | <b>0.47</b><br><b>(0.27-0.83)</b> | <b>0.57</b><br><b>(0.41-0.78)</b> | 1.00<br>(0.90-1.12)               | 0.13<br>(0.01-1.08) | 0.75<br>(0.40-1.41)               | <b>0.69</b><br><b>(0.49-0.99)</b> | <b>0.11</b><br><b>(0.02-0.74)</b> | 0.64<br>(0.36-1.12)               | <b>0.62</b><br><b>(0.45-0.86)</b> | <b>0.12</b><br><b>(0.02-0.85)</b> | <b>0.62</b><br><b>(0.40-0.96)</b> | <b>0.62</b><br><b>(0.43-0.89)</b> | 1.01<br>(0.63-1.64)               | <b>0.79</b><br><b>(0.68-0.92)</b> | 1.00<br>(0.83-1.20) | NE                                | <b>0.33</b><br><b>(0.14-0.82)</b> | <b>0.66</b><br><b>(0.47-0.94)</b> |
| <b>Dominican</b>                             |                                   |                                   |                     |                                   |                                   |                                   |                     |                                   |                                   |                                   |                                   |                                   |                                   |                                   |                                   |                                   |                                   |                     |                                   |                                   |                                   |
| <b>U.S.-born (yes)</b><br>(n=264)            | 0.63<br>(0.31-1.30)               | 2.17<br>(1.33-3.55)               | 1.65<br>(0.41-6.68) | 0.87<br>(0.58-1.31)               | <b>1.62</b><br><b>(1.30-2.02)</b> | 0.98<br>(0.43-2.20)               | 1.32<br>(0.52-3.33) | 2.50<br>(0.76-8.25)               | NE                                | 0.78<br>(0.50-1.21)               | 0.88<br>(0.44-1.76)               | 0.82<br>(0.12-5.75)               | 0.85<br>(0.56-1.28)               | 1.05<br>(0.55-2.02)               | 0.46<br>(0.07-3.02)               | 1.06<br>(0.82-1.36)               | 1.05<br>(0.77-1.42)               | 1.60<br>(0.70-3.67) | 0.50<br>(0.24-1.02)               | 1.26<br>(0.52-3.02)               | 0.69<br>(0.08-5.75)               |
| <b>High Acculturation</b><br>(n=208)         | 0.68<br>(0.31-1.51)               | 2.15<br>(1.25-3.69)               | 1.85<br>(0.46-7.43) | 0.99<br>(0.64-1.51)               | <b>1.60</b><br><b>(1.27-2.02)</b> | 1.05<br>(0.46-2.44)               | 1.45<br>(0.52-4.00) | <b>3.32</b><br><b>(1.11-9.93)</b> | NE                                | 0.77<br>(0.41-1.45)               | 1.04<br>(0.54-2.02)               | 0.82<br>(0.12-5.75)               | 1.15<br>(0.59-2.27)               | 0.83<br>(0.35-1.99)               | 0.46<br>(0.07-3.02)               | 0.97<br>(0.66-1.43)               | 1.06<br>(0.77-1.46)               | 1.60<br>(0.70-3.67) | 0.23<br>(0.03-1.62)               | 1.45<br>(0.57-3.66)               | 0.69<br>(0.08-5.75)               |
| <b>Medium/Low Acculturation</b><br>(n=56)    | 0.49<br>(0.11-2.16)               | 2.28<br>(0.86-6.06)               | NE                  | 0.44<br>(0.18-1.09)               | <b>1.72</b><br><b>(1.11-2.67)</b> | 0.38<br>(0.05-2.93)               | 0.97<br>(0.22-4.36) | NE                                | NE                                | 0.44<br>(0.20-1.01)               | 0.52<br>(0.10-2.59)               | NE                                | 0.62<br>(0.25-1.50)               | 1.63<br>(0.74-3.57)               | NE                                | 0.99<br>(0.45-2.17)               | 1.00<br>(0.48-2.10)               | NE                  | NE                                | 0.78<br>(0.10-6.23)               | NE                                |
| <b>U.S.-born (no)</b><br>(n=1,394)           | 0.63<br>(0.37-1.08)               | 0.76<br>(0.55-1.04)               | 1.16<br>(0.94-1.44) | 0.75<br>(0.55-1.03)               | <b>0.84</b><br><b>(0.72-0.99)</b> | 1.02<br>(0.89-1.17)               | 1.31<br>(0.64-2.68) | 0.33<br>(0.12-0.87)               | <b>0.44</b><br><b>(0.22-0.87)</b> | <b>0.80</b><br><b>(0.65-0.99)</b> | <b>0.66</b><br><b>(0.44-0.97)</b> | 0.90<br>(0.69-1.18)               | <b>0.63</b><br><b>(0.50-0.81)</b> | <b>0.41</b><br><b>(0.26-0.64)</b> | <b>0.72</b><br><b>(0.54-0.96)</b> | 0.96<br>(0.82-1.12)               | <b>0.75</b><br><b>(0.59-0.94)</b> | 1.11<br>(0.91-1.35) | 0.87<br>(0.56-1.35)               | <b>0.20</b><br><b>(0.09-0.47)</b> | 1.33<br>(0.84-2.12)               |
| <b>High Acculturation</b><br>(n=594)         | 1.08<br>(0.61-1.92)               | 0.72<br>(0.45-1.14)               | 1.23<br>(0.81-1.88) | 1.04<br>(0.75-1.46)               | 0.90<br>(0.74-1.09)               | 1.00<br>(0.78-1.27)               | 1.12<br>(0.41-3.04) | 0.26<br>(0.05-1.41)               | 0.72<br>(0.22-2.40)               | 0.99<br>(0.47-2.10)               | 0.77<br>(0.47-1.27)               | 0.87<br>(0.48-1.56)               | 1.41<br>(0.64-3.10)               | <b>0.37</b><br><b>(0.21-0.67)</b> | 0.93<br>(0.57-1.54)               | 1.11<br>(0.80-1.55)               | <b>0.65</b><br><b>(0.48-0.89)</b> | 1.18<br>(0.84-1.65) | <b>0.06</b><br><b>(0.01-0.54)</b> | <b>0.10</b><br><b>(0.03-0.32)</b> | 1.65<br>(0.91-2.99)               |
| <b>Medium/Low Acculturation</b><br>(n=800)   | <b>0.21</b><br><b>(0.08-0.56)</b> | 0.79<br>(0.54-1.15)               | 1.14<br>(0.85-1.51) | <b>0.43</b><br><b>(0.25-0.75)</b> | <b>0.78</b><br><b>(0.63-0.97)</b> | 1.03<br>(0.87-1.21)               | 1.42<br>(0.56-3.61) | 0.38<br>(0.12-1.25)               | <b>0.34</b><br><b>(0.15-0.76)</b> | 0.43<br>(0.16-1.11)               | <b>0.51</b><br><b>(0.27-0.95)</b> | 0.92<br>(0.67-1.25)               | 0.53<br>(0.18-1.56)               | <b>0.46</b><br><b>(0.25-0.83)</b> | <b>0.60</b><br><b>(0.41-0.90)</b> | 0.92<br>(0.41-2.04)               | 0.87<br>(0.62-1.23)               | 1.07<br>(0.85-1.33) | 0.28<br>(0.04-1.91)               | <b>0.34</b><br><b>(0.13-0.93)</b> | 1.16<br>(0.60-2.26)               |

| Central/South American                    |                                   |                                   |                     |                                   |                                   |                     |                     |                                   |                                   |                                   |                                   |                                   |                                   |                                   |                                   |                                   |                                   |                     |                                   |                                   |                                   |
|-------------------------------------------|-----------------------------------|-----------------------------------|---------------------|-----------------------------------|-----------------------------------|---------------------|---------------------|-----------------------------------|-----------------------------------|-----------------------------------|-----------------------------------|-----------------------------------|-----------------------------------|-----------------------------------|-----------------------------------|-----------------------------------|-----------------------------------|---------------------|-----------------------------------|-----------------------------------|-----------------------------------|
| <b>U.S.-born (yes) (n=1,113)</b>          | 1.31<br>(0.94-1.82)               | <b>1.52</b><br><b>(1.07-2.16)</b> | 0.98<br>(0.43-2.25) | <b>1.19</b><br><b>(1.02-1.40)</b> | <b>1.23</b><br><b>(1.04-1.45)</b> | 1.02<br>(0.65-1.58) | 0.82<br>(0.48-1.40) | 0.96<br>(0.34-2.74)               | 0.36<br>(0.08-1.54)               | 1.26<br>(1.01-1.55)               | 1.28<br>(0.90-1.83)               | <b>1.66</b><br><b>(1.01-2.73)</b> | 0.87<br>(0.65-1.15)               | 0.73<br>(0.53-1.03)               | 0.93<br>(0.53-1.63)               | 1.10<br>(0.97-1.25)               | 1.02<br>(0.84-1.23)               | 0.80<br>(0.46-1.41) | <b>0.52</b><br><b>(0.30-0.89)</b> | <b>0.23</b><br><b>(0.11-0.49)</b> | 1.41<br>(0.67-2.95)               |
| <b>High Acculturation (n=994)</b>         | <b>1.43</b><br><b>(1.02-2.02)</b> | <b>1.59</b><br><b>(1.10-2.30)</b> | 1.08<br>(0.47-2.45) | <b>1.28</b><br><b>(1.09-1.49)</b> | <b>1.24</b><br><b>(1.05-1.45)</b> | 1.04<br>(0.66-1.64) | 0.81<br>(0.42-1.57) | 1.04<br>(0.36-2.98)               | 0.45<br>(0.11-1.86)               | 1.08<br>(0.81-1.46)               | 1.30<br>(0.91-1.84)               | 1.47<br>(0.85-2.55)               | 1.01<br>(0.72-1.42)               | 0.80<br>(0.57-1.12)               | 1.08<br>(0.64-1.81)               | 1.10<br>(0.94-1.29)               | 1.07<br>(0.89-1.29)               | 0.91<br>(0.53-1.56) | 0.96<br>(0.43-2.13)               | <b>0.24</b><br><b>(0.11-0.53)</b> | 1.00<br>(0.43-2.34)               |
| <b>Medium/Low Acculturation (n=119)</b>   | 0.74<br>(0.32-1.72)               | 0.67<br>(0.16-2.90)               | NE                  | 0.74<br>(0.45-1.22)               | 1.15<br>(0.46-2.85)               | 0.77<br>(0.16-3.66) | 0.85<br>(0.36-1.99) | NE                                | NE                                | 1.52<br>(0.69-3.34)               | 1.12<br>(0.18-7.07)               | <b>2.78</b><br><b>(1.47-5.24)</b> | 1.87<br>(0.86-4.05)               | NE                                | NE                                | 1.06<br>(0.66-1.70)               | 0.46<br>(0.11-1.83)               | NE                  | 0.19<br>(0.02-1.49)               | NE                                | 3.59<br>(2.21-5.82)               |
| <b>U.S.-born (no) (n=7,049)</b>           | <b>0.73</b><br><b>(0.56-0.96)</b> | <b>0.65</b><br><b>(0.55-0.77)</b> | 0.92<br>(0.77-1.09) | <b>0.86</b><br><b>(0.76-0.98)</b> | <b>0.89</b><br><b>(0.83-0.96)</b> | 0.99<br>(0.91-1.07) | 0.93<br>(0.61-1.41) | <b>0.61</b><br><b>(0.44-0.85)</b> | <b>0.51</b><br><b>(0.36-0.73)</b> | <b>0.72</b><br><b>(0.63-0.82)</b> | <b>0.63</b><br><b>(0.51-0.78)</b> | <b>0.83</b><br><b>(0.69-0.99)</b> | <b>0.61</b><br><b>(0.54-0.69)</b> | <b>0.53</b><br><b>(0.43-0.65)</b> | <b>0.65</b><br><b>(0.54-0.78)</b> | <b>0.90</b><br><b>(0.84-0.96)</b> | <b>0.83</b><br><b>(0.76-0.91)</b> | 0.91<br>(0.81-1.03) | <b>0.40</b><br><b>(0.31-0.51)</b> | <b>0.34</b><br><b>(0.22-0.55)</b> | <b>0.47</b><br><b>(0.35-0.64)</b> |
| <b>High Acculturation (n=3,366)</b>       | 0.75<br>(0.50-1.12)               | <b>0.70</b><br><b>(0.55-0.88)</b> | 0.92<br>(0.70-1.20) | 1.00<br>(0.85-1.18)               | 0.92<br>(0.84-1.01)               | 0.94<br>(0.82-1.07) | 1.11<br>(0.72-1.70) | 0.74<br>(0.49-1.11)               | <b>0.56</b><br><b>(0.33-0.94)</b> | 0.75<br>(0.51-1.11)               | <b>0.68</b><br><b>(0.51-0.90)</b> | 0.87<br>(0.64-1.18)               | 1.12<br>(0.80-1.56)               | <b>0.59</b><br><b>(0.46-0.76)</b> | <b>0.62</b><br><b>(0.46-0.83)</b> | 0.96<br>(0.80-1.16)               | 0.91<br>(0.76-1.09)               | 0.91<br>(0.76-1.09) | 0.44<br>(0.16-1.21)               | <b>0.39</b><br><b>(0.22-0.68)</b> | <b>0.56</b><br><b>(0.37-0.85)</b> |
| <b>Medium/Low Acculturation (n=3,664)</b> | 0.71<br>(0.49-1.03)               | <b>0.60</b><br><b>(0.48-0.75)</b> | 0.91<br>(0.73-1.12) | <b>0.70</b><br><b>(0.57-0.87)</b> | <b>0.84</b><br><b>(0.76-0.93)</b> | 1.04<br>(0.94-1.15) | 0.79<br>(0.41-1.52) | <b>0.51</b><br><b>(0.32-0.81)</b> | <b>0.47</b><br><b>(0.30-0.75)</b> | <b>0.47</b><br><b>(0.28-0.79)</b> | <b>0.57</b><br><b>(0.42-0.79)</b> | 0.80<br>(0.63-1.02)               | <b>0.40</b><br><b>(0.21-0.74)</b> | <b>0.44</b><br><b>(0.31-0.61)</b> | <b>0.68</b><br><b>(0.55-0.86)</b> | 0.86<br>(0.67-1.11)               | <b>0.84</b><br><b>(0.73-0.95)</b> | 0.91<br>(0.77-1.07) | <b>0.09</b><br><b>(0.02-0.46)</b> | <b>0.29</b><br><b>(0.14-0.60)</b> | <b>0.39</b><br><b>(0.25-0.60)</b> |

Abbreviations: ref (reference); NE (not estimable)

\* Language acculturation categories include high (English only interview) and medium/low (English and Spanish interview or Spanish only interview).

Adjusted for sex (male, female), annual household income (<\$35,000, \$35,000-\$74,999, \$75,000+), educational attainment (<high school, high school graduate, some college, ≥college), unemployed/not in the labor force (yes, no), occupational class (professional/management, support services, laborers), marital/cohabitating status (married/cohabitating, divorced/widowed, single), region of residence (Northeast, Midwest, South, West), heavy alcohol consumption (≥2 drinks/day for women and ≥3 drinks/day for men), serious psychological distress (Kessler-6 psychological distress scale score ≥13), "ideal" cardiovascular health (never smoking/quit >12 months prior to interview, BMI <25 kg/m<sup>2</sup>, meeting physical activity guidelines, and no prior diagnosis of dyslipidemia, hypertension, or diabetes/prediabetes), and cancer.

Note. All estimates are weighted for the survey's complex sampling design. Trouble falling asleep, trouble staying asleep, sleep medication use, and restorative sleep were measured during the survey years 2013-2017.



**Supplemental Table 11. Fully-Adjusted Prevalence Ratios of Sleep Characteristics for (a) US-Born Hispanic/Latino Heritage Groups and (b) Foreign-born Hispanic/Latino Heritage Groups With and Without Adjustment for Time in the US Compared Foreign-born non-Hispanic Whites, National Health Interview Survey, 2004-2017 (N=56,372)**

| Group (n)                                             | Prevalence Ratio (95% Confidence Interval)             |                                   |                                   |                                                          |                                                          |                                                        |                                                        |
|-------------------------------------------------------|--------------------------------------------------------|-----------------------------------|-----------------------------------|----------------------------------------------------------|----------------------------------------------------------|--------------------------------------------------------|--------------------------------------------------------|
|                                                       | Sleep Duration<br>(reference: recommended (7-9 hours)) |                                   |                                   | Sleep Quality                                            |                                                          |                                                        |                                                        |
|                                                       | Very Short<br>(≤5-hours)<br>(n=4,115)                  | Short<br>(<7-hours)<br>(n=14,048) | Long<br>(>9-hours)<br>(n=1,586)   | Trouble<br>Falling<br>Asleep<br>(≥3 nights)<br>(n=3,431) | Trouble<br>Staying<br>Asleep<br>(≥3 nights)<br>(n=3,520) | Non-<br>restorative<br>Sleep<br>(≥3 days)<br>(n=7,734) | Sleep<br>Medication<br>Use<br>(≥3 nights)<br>(n=1,073) |
| <b>Foreign-born Non-Hispanic Whites<br/>(n=8,857)</b> | ref                                                    | ref                               | ref                               | ref                                                      | ref                                                      | ref                                                    | ref                                                    |
| <b>Mexican</b>                                        |                                                        |                                   |                                   |                                                          |                                                          |                                                        |                                                        |
| <b>Overall (n=30,100)</b>                             | 1.09<br>(0.96-1.25)                                    | <b>1.14</b><br><b>(1.06-1.22)</b> | 1.00<br>(0.88-1.13)               | 0.92<br>(0.81-1.05)                                      | <b>0.87</b><br><b>(0.78-0.97)</b>                        | 0.97<br>(0.92-1.01)                                    | 0.92<br>(0.73-1.14)                                    |
| <b>US-born (yes)<br/>(n=14,282)</b>                   | <b>1.17</b><br><b>(1.02-1.33)</b>                      | <b>1.23</b><br><b>(1.14-1.33)</b> | 1.01<br>(0.88-1.15)               | 1.00<br>(0.87-1.14)                                      | 0.97<br>(0.86-1.10)                                      | 0.96<br>(0.91-1.01)                                    | 0.98<br>(0.78-1.23)                                    |
| <b>US-born (no) (n=15,818)</b>                        |                                                        |                                   |                                   |                                                          |                                                          |                                                        |                                                        |
| <b>Not Adjusted for Time in the US</b>                | 0.88<br>(0.73-1.07)                                    | 1.00<br>(0.91-1.10)               | 1.00<br>(0.86-1.17)               | <b>0.78</b><br><b>(0.66-0.94)</b>                        | <b>0.72</b><br><b>(0.62-0.84)</b>                        | 0.98<br>(0.93-1.04)                                    | <b>0.68</b><br><b>(0.48-0.96)</b>                      |
| <b>Adjusted for Time in the US</b>                    | 0.88<br>(0.73-1.06)                                    | 0.97<br>(0.90-1.06)               | 1.05<br>(0.81-1.36)               | <b>0.79</b><br><b>(0.66-0.94)</b>                        | <b>0.72</b><br><b>(0.62-0.84)</b>                        | 1.03<br>(0.94-1.13)                                    | <b>0.69</b><br><b>(0.49-0.97)</b>                      |
| <b>Puerto Rican</b>                                   |                                                        |                                   |                                   |                                                          |                                                          |                                                        |                                                        |
| <b>Overall (n=5,077)</b>                              | <b>1.73</b><br><b>(1.49-2.00)</b>                      | <b>1.30</b><br><b>(1.19-1.41)</b> | 1.06<br>(0.89-1.25)               | <b>1.19</b><br><b>(1.03-1.39)</b>                        | 1.14<br>(0.99-1.31)                                      | 0.95<br>(0.90-1.01)                                    | <b>1.33</b><br><b>(1.07-1.64)</b>                      |
| <b>US-born (yes)<br/>(n=2,544)</b>                    | <b>1.81</b><br><b>(1.51-2.17)</b>                      | <b>1.33</b><br><b>(1.19-1.48)</b> | 1.04<br>(0.82-1.33)               | 1.20<br>(0.99-1.46)                                      | <b>1.22</b><br><b>(1.02-1.46)</b>                        | 0.94<br>(0.87-1.02)                                    | <b>1.32</b><br><b>(1.01-1.73)</b>                      |
| <b>US-born (no)<br/>(n=2,533)</b>                     |                                                        |                                   |                                   |                                                          |                                                          |                                                        |                                                        |
| <b>Not Adjusted for Time in the US</b>                | <b>1.58</b><br><b>(1.32-1.89)</b>                      | <b>1.23</b><br><b>(1.10-1.38)</b> | 1.11<br>(0.92-1.33)               | <b>1.22</b><br><b>(1.01-1.46)</b>                        | 1.09<br>(0.91-1.30)                                      | 0.95<br>(0.88-1.02)                                    | <b>1.41</b><br><b>(1.09-1.83)</b>                      |
| <b>Adjusted for Time in the US</b>                    | <b>1.56</b><br><b>(1.20-1.88)</b>                      | <b>1.26</b><br><b>(1.15-1.38)</b> | 1.02<br>(0.77-1.36)               | <b>1.24</b><br><b>(1.04-1.50)</b>                        | 1.11<br>(0.93-1.33)                                      | 1.07<br>(0.95-1.21)                                    | <b>1.40</b><br><b>(1.08-1.82)</b>                      |
| <b>Cuban</b>                                          |                                                        |                                   |                                   |                                                          |                                                          |                                                        |                                                        |
| <b>Overall (n=2,518)</b>                              | 0.95<br>(0.75-1.20)                                    | 0.99<br>(0.86-1.14)               | <b>0.76</b><br><b>(0.60-0.98)</b> | 0.92<br>(0.70-1.20)                                      | 0.93<br>(0.76-1.15)                                      | 0.97<br>(0.90-1.04)                                    | 1.09<br>(0.77-1.55)                                    |
| <b>US-born Cuban (yes)<br/>(n=559)</b>                | 1.01<br>(0.67-1.51)                                    | 1.20<br>(0.98-1.47)               | 0.79<br>(0.47-1.33)               | 1.14<br>(0.79-1.65)                                      | 1.17<br>(0.84-1.65)                                      | 0.91<br>(0.78-1.06)                                    | 1.63<br>(0.91-2.93)                                    |
| <b>US-born Cuban (no)</b>                             |                                                        |                                   |                                   |                                                          |                                                          |                                                        |                                                        |

|                                        |                                   |                                   |                                   |                     |                                   |                     |                                   |
|----------------------------------------|-----------------------------------|-----------------------------------|-----------------------------------|---------------------|-----------------------------------|---------------------|-----------------------------------|
| (n=1,959)                              |                                   |                                   |                                   |                     |                                   |                     |                                   |
| <b>Not Adjusted for Time in the US</b> | 0.92<br>(0.71-1.20)               | 0.90<br>(0.77-1.06)               | 0.76<br>(0.58-1.00)               | 0.82<br>(0.59-1.14) | 0.85<br>(0.65-1.10)               | 0.99<br>(0.91-1.06) | 0.96<br>(0.63-1.45)               |
| <b>Adjusted for Time in the US</b>     | 0.99<br>(0.76-1.28)               | 0.95<br>(0.84-1.08)               | <b>0.69</b><br><b>(0.48-0.99)</b> | 0.88<br>(0.64-1.22) | 0.90<br>(0.69-1.17)               | 1.05<br>(0.90-1.23) | 1.03<br>(0.68-1.57)               |
| <b>Dominican</b>                       |                                   |                                   |                                   |                     |                                   |                     |                                   |
| <b>Overall (n=1,658)</b>               | 1.11<br>(0.88-1.41)               | 0.98<br>(0.83-1.16)               | 0.91<br>(0.64-1.28)               | 0.88<br>(0.68-1.13) | 0.94<br>(0.72-1.23)               | 1.02<br>(0.94-1.12) | 1.03<br>(0.67-1.59)               |
| <b>US-born (yes)</b><br>(n=264)        | 1.38<br>(0.80-2.38)               | 1.21<br>(0.88-1.67)               | 0.98<br>(0.49-1.99)               | 0.82<br>(0.51-1.31) | 1.25<br>(0.81-1.93)               | 0.92<br>(0.75-1.13) | 0.97<br>(0.42-2.20)               |
| <b>US-born (no)</b><br>(n=1,394)       |                                   |                                   |                                   |                     |                                   |                     |                                   |
| <b>Not Adjusted for Time in the US</b> | 1.05<br>(0.84-1.33)               | 0.92<br>(0.76-1.10)               | 0.89<br>(0.60-1.32)               | 0.88<br>(0.68-1.16) | 0.87<br>(0.65-1.18)               | 1.05<br>(0.95-1.17) | 1.02<br>(0.64-1.63)               |
| <b>Adjusted for Time in the US</b>     | 1.07<br>(0.85-1.34)               | 0.96<br>(0.84-1.10)               | 0.74<br>(0.45-1.20)               | 0.90<br>(0.69-1.19) | 0.89<br>(0.66-1.21)               | 1.00<br>(0.84-1.19) | 1.05<br>(0.65-1.68)               |
| <b>Central/South American</b>          |                                   |                                   |                                   |                     |                                   |                     |                                   |
| <b>Overall (n=8,162)</b>               | 0.99<br>(0.85-1.15)               | <b>1.13</b><br><b>(1.04-1.23)</b> | <b>0.81</b><br><b>(0.69-0.96)</b> | 0.94<br>(0.78-1.13) | 0.89<br>(0.76-1.04)               | 0.98<br>(0.94-1.03) | <b>0.69</b><br><b>(0.51-0.91)</b> |
| <b>US-born (yes)</b><br>(n=1,113)      | <b>1.41</b><br><b>(1.05-1.90)</b> | <b>1.30</b><br><b>(1.10-1.53)</b> | 0.85<br>(0.60-1.20)               | 1.27<br>(0.96-1.67) | 1.14<br>(0.86-1.52)               | 0.95<br>(0.85-1.06) | 0.95<br>(0.56-1.62)               |
| <b>US-born (no)</b><br>(n=7,049)       |                                   |                                   |                                   |                     |                                   |                     |                                   |
| <b>Not Adjusted for Time in the US</b> | 0.91<br>(0.77-1.07)               | <b>1.10</b><br><b>(1.01-1.20)</b> | <b>0.83</b><br><b>(0.70-1.00)</b> | 0.84<br>(0.69-1.02) | <b>0.84</b><br><b>(0.72-0.99)</b> | 0.99<br>(0.94-1.04) | <b>0.64</b><br><b>(0.47-0.88)</b> |
| <b>Adjusted for Time in the US</b>     | 0.94<br>(0.80-1.11)               | 1.07<br>(1.00-1.15)               | 0.78<br>(0.57-1.06)               | 0.86<br>(0.71-1.05) | 0.87<br>(0.74-1.02)               | 1.01<br>(0.93-1.10) | <b>0.66</b><br><b>(0.48-0.90)</b> |

Abbreviations: ref (reference)

Adjusted for age (18-30, 31-49, 50-64, 65+ years), sex (male, female), annual household income (<\$35,000, \$35,000-\$74,999, \$75,000+), educational attainment (<high school, high school graduate, some college, ≥college), unemployed/not in the labor force (yes, no), occupational class (professional/management, support services, laborers), marital/cohabitating status (married/cohabitating, divorced/widowed, single), region of residence (Northeast, Midwest, South, West), alcohol consumption (never, former, current), serious psychological distress (Kessler-6 psychological distress scale score ≥13), "ideal" cardiovascular health (never smoking/quit >12 months prior to interview, BMI <25 kg/m<sup>2</sup>, meeting physical activity guidelines, and no prior diagnosis of dyslipidemia, hypertension, or diabetes/prediabetes), and cancer.

Note. All estimates are weighted for the survey's complex sampling design. Trouble falling asleep, trouble staying asleep, nonrestorative sleep, and sleep medication were measured during the survey years 2013-2017. Time in the US was defined as 15 years, 15+ years.

**Supplemental Table 12. Fully-Adjusted Prevalence Ratios of Sleep Characteristics for (a) Foreign-born Whites Stratified by Time in the US, (b) US-Born Hispanic/Latino Heritage Groups, and (c) Foreign-born Hispanic/Latino Heritage Groups Stratified by Time in the US Compared to US-born non-Hispanic Whites, National Health Interview Survey, 2004-2017 (N=254,669)**

| Group (n)                                           | Prevalence Ratio (95% Confidence Interval)             |                                   |                                   |                                                           |                                                           |                                                         |                                                         |
|-----------------------------------------------------|--------------------------------------------------------|-----------------------------------|-----------------------------------|-----------------------------------------------------------|-----------------------------------------------------------|---------------------------------------------------------|---------------------------------------------------------|
|                                                     | Sleep Duration<br>(reference: recommended (7-9 hours)) |                                   |                                   | Sleep Quality                                             |                                                           |                                                         |                                                         |
|                                                     | Very Short<br>(≤5-hours)<br>(n=21,227)                 | Short<br>(<7-hours)<br>(n=75,139) | Long<br>(>9-hours)<br>(n=9,190)   | Trouble<br>Falling<br>Asleep<br>(≥3 nights)<br>(n=22,038) | Trouble<br>Staying<br>Asleep<br>(≥3 nights)<br>(n=30,013) | Non-<br>restorative<br>Sleep<br>(≥3 days)<br>(n=46,103) | Sleep<br>Medication<br>Use<br>(≥3 nights)<br>(n=11,097) |
| <b>US-born Non-Hispanic Whites</b><br>(n=198,297)   | Ref                                                    | Ref                               | Ref                               | Ref                                                       | Ref                                                       | Ref                                                     | Ref                                                     |
| <b>Foreign-born Non-Hispanic White</b><br>(n=8,857) | 1.03<br>(0.94-1.14)                                    | 1.05<br>(1.00-1.11)               | <b>1.11</b><br><b>(1.01-1.21)</b> | 1.09<br>(0.99-1.19)                                       | <b>1.27</b><br><b>(1.17-1.37)</b>                         | <b>0.96</b><br><b>(0.93-0.99)</b>                       | <b>1.34</b><br><b>(1.16-1.55)</b>                       |
| <b>Time in the US (&lt;15 years)</b> (n=2,169)      | <b>0.70</b><br><b>(0.54-0.91)</b>                      | <b>0.80</b><br><b>(0.71-0.90)</b> | 0.69<br>(0.43-1.12)               | <b>0.76</b><br><b>(0.58-0.98)</b>                         | <b>0.76</b><br><b>(0.59-0.98)</b>                         | 0.92<br>(0.81-1.06)                                     | 0.72<br>(0.46-1.13)                                     |
| <b>Time in the US (15+ years)</b> (n=6,657)         | <b>1.42</b><br><b>(1.09-1.85)</b>                      | <b>1.25</b><br><b>(1.11-1.40)</b> | 1.44<br>(0.90-2.33)               | <b>1.32</b><br><b>(1.02-1.71)</b>                         | <b>1.31</b><br><b>(1.02-1.68)</b>                         | 1.08<br>(0.94-1.24)                                     | 1.38<br>(0.88-2.16)                                     |
| <b>Mexican</b>                                      |                                                        |                                   |                                   |                                                           |                                                           |                                                         |                                                         |
| <b>Overall</b> (n=30,100)                           | <b>0.75</b><br><b>(0.71-0.80)</b>                      | <b>0.88</b><br><b>(0.85-0.92)</b> | <b>0.87</b><br><b>(0.81-0.93)</b> | <b>0.77</b><br><b>(0.72-0.82)</b>                         | <b>0.65</b><br><b>(0.62-0.69)</b>                         | <b>1.08</b><br><b>(1.05-1.11)</b>                       | <b>0.52</b><br><b>(0.46-0.58)</b>                       |
| <b>US-born (yes)</b><br>(n=14,282)                  | 1.04<br>(0.97-1.12)                                    | 1.04<br>(0.99-1.09)               | 0.95<br>(0.87-1.03)               | <b>0.92</b><br><b>(0.85-0.99)</b>                         | <b>0.80</b><br><b>(0.74-0.85)</b>                         | 1.02<br>(0.98-1.05)                                     | <b>0.66</b><br><b>(0.58-0.76)</b>                       |
| <b>US-born (no)</b><br>(n=15,818)                   | <b>0.52</b><br><b>(0.47-0.57)</b>                      | <b>0.72</b><br><b>(0.68-0.76)</b> | <b>0.79</b><br><b>(0.72-0.86)</b> | <b>0.59</b><br><b>(0.54-0.65)</b>                         | <b>0.50</b><br><b>(0.46-0.55)</b>                         | <b>1.17</b><br><b>(1.13-1.21)</b>                       | <b>0.36</b><br><b>(0.29-0.43)</b>                       |
| <b>Time in the US (&lt;15 years)</b> (n=5,739)      | <b>0.31</b><br><b>(0.27-0.37)</b>                      | <b>0.56</b><br><b>(0.52-0.60)</b> | <b>0.81</b><br><b>(0.68-0.98)</b> | <b>0.42</b><br><b>(0.36-0.50)</b>                         | <b>0.39</b><br><b>(0.32-0.47)</b>                         | <b>0.80</b><br><b>(0.74-0.87)</b>                       | <b>0.25</b><br><b>(0.15-0.42)</b>                       |
| <b>Time in the US (15+ years)</b> (n=9,919)         | <b>0.63</b><br><b>(0.56-0.70)</b>                      | <b>0.77</b><br><b>(0.73-0.81)</b> | <b>0.70</b><br><b>(0.60-0.81)</b> | <b>0.65</b><br><b>(0.59-0.72)</b>                         | <b>0.53</b><br><b>(0.49-0.59)</b>                         | <b>0.81</b><br><b>(0.76-0.86)</b>                       | <b>0.39</b><br><b>(0.32-0.48)</b>                       |
| <b>Puerto Rican</b>                                 |                                                        |                                   |                                   |                                                           |                                                           |                                                         |                                                         |
| <b>Overall</b> (n=5,077)                            | <b>1.37</b><br><b>(1.24-1.51)</b>                      | <b>1.15</b><br><b>(1.08-1.22)</b> | 0.92<br>(0.81-1.03)               | 1.05<br>(0.95-1.17)                                       | 0.91<br>(0.83-1.00)                                       | 1.01<br>(0.96-1.07)                                     | 0.99<br>(0.85-1.15)                                     |
| <b>US-born (yes)</b><br>(n=2,544)                   | <b>1.41</b><br><b>(1.24-1.60)</b>                      | <b>1.19</b><br><b>(1.09-1.29)</b> | 0.87<br>(0.73-1.04)               | 1.05<br>(0.91-1.21)                                       | 0.97<br>(0.85-1.12)                                       | 1.00<br>(0.93-1.07)                                     | 0.96<br>(0.77-1.21)                                     |
| <b>US-born (no)</b><br>(n=2,533)                    | <b>1.31</b><br><b>(1.15-1.49)</b>                      | <b>1.11</b><br><b>(1.01-1.21)</b> | 0.97<br>(0.83-1.12)               | 1.06<br>(0.92-1.22)                                       | <b>0.84</b><br><b>(0.73-0.97)</b>                         | 1.03<br>(0.96-1.10)                                     | 1.02<br>(0.83-1.25)                                     |
| <b>Time in the US (&lt;15 years)</b> (n=550)        | 1.26<br>(0.91-1.76)                                    | <b>1.17</b><br><b>(1.01-1.35)</b> | 1.16<br>(0.73-1.83)               | 0.77<br>(0.54-1.08)                                       | <b>0.61</b><br><b>(0.40-0.94)</b>                         | 0.82<br>(0.66-1.02)                                     | 0.98<br>(0.64-1.52)                                     |
| <b>Time in the US (15+ years)</b> (n=1,969)         | <b>1.33</b>                                            | <b>1.15</b>                       | 0.89                              | <b>1.17</b>                                               | 0.92                                                      | 1.01                                                    | 1.01                                                    |

|                                                |                                   |                                   |                                   |                                   |                                   |                                   |                                   |
|------------------------------------------------|-----------------------------------|-----------------------------------|-----------------------------------|-----------------------------------|-----------------------------------|-----------------------------------|-----------------------------------|
|                                                | <b>(1.16-1.52)</b>                | <b>(1.06-1.23)</b>                | (0.69-1.14)                       | <b>(1.02-1.36)</b>                | (0.80-1.06)                       | (0.91-1.12)                       | (0.80-1.26)                       |
| <b>Cuban</b>                                   |                                   |                                   |                                   |                                   |                                   |                                   |                                   |
| <b>Overall (n=2,518)</b>                       | <b>0.81</b><br><b>(0.68-0.96)</b> | <b>0.88</b><br><b>(0.78-1.00)</b> | <b>0.68</b><br><b>(0.56-0.82)</b> | <b>0.78</b><br><b>(0.62-0.97)</b> | <b>0.70</b><br><b>(0.58-0.83)</b> | 1.06<br>(1.00-1.12)               | <b>0.68</b><br><b>(0.53-0.89)</b> |
| <b>US-born Cuban (yes)</b><br>(n=559)          | 0.90<br>(0.64-1.27)               | 1.07<br>(0.89-1.29)               | 0.66<br>(0.40-1.09)               | 0.97<br>(0.72-1.31)               | 0.94<br>(0.70-1.26)               | 0.97<br>(0.84-1.12)               | 0.98<br>(0.57-1.69)               |
| <b>US-born Cuban (no)</b><br>(n=1,959)         | <b>0.79</b><br><b>(0.65-0.96)</b> | <b>0.82</b><br><b>(0.71-0.94)</b> | <b>0.68</b><br><b>(0.55-0.85)</b> | <b>0.71</b><br><b>(0.53-0.95)</b> | <b>0.63</b><br><b>(0.49-0.79)</b> | <b>1.09</b><br><b>(1.03-1.15)</b> | <b>0.61</b><br><b>(0.43-0.85)</b> |
| <b>Time in the US (&lt;15 years) (n=634)</b>   | <b>0.56</b><br><b>(0.37-0.83)</b> | <b>0.61</b><br><b>(0.51-0.74)</b> | <b>0.57</b><br><b>(0.36-0.92)</b> | <b>0.46</b><br><b>(0.26-0.81)</b> | <b>0.45</b><br><b>(0.29-0.69)</b> | <b>0.75</b><br><b>(0.61-0.93)</b> | <b>0.17</b><br><b>(0.08-0.38)</b> |
| <b>Time in the US (15+ years) (n=1,319)</b>    | 1.00<br>(0.80-1.26)               | 1.00<br>(0.89-1.12)               | 0.74<br>(0.55-1.00)               | 0.92<br>(0.72-1.19)               | <b>0.75</b><br><b>(0.59-0.95)</b> | 0.97<br>(0.85-1.10)               | 0.85<br>(0.59-1.21)               |
| <b>Dominican</b>                               |                                   |                                   |                                   |                                   |                                   |                                   |                                   |
| <b>Overall (n=1,658)</b>                       | 0.89<br>(0.75-1.06)               | 0.88<br>(0.77-1.01)               | <b>0.73</b><br><b>(0.54-0.98)</b> | <b>0.76</b><br><b>(0.62-0.92)</b> | <b>0.67</b><br><b>(0.55-0.83)</b> | <b>1.09</b><br><b>(1.00-1.20)</b> | 0.81<br>(0.54-1.20)               |
| <b>US-born (yes)</b><br>(n=264)                | 1.08<br>(0.68-1.73)               | 1.06<br>(0.78-1.46)               | 0.77<br>(0.40-1.48)               | 0.73<br>(0.47-1.13)               | 0.97<br>(0.65-1.43)               | 0.97<br>(0.79-1.20)               | 0.64<br>(0.31-1.31)               |
| <b>US-born (no)</b><br>(n=1,394)               | 0.85<br>(0.72-1.01)               | <b>0.84</b><br><b>(0.72-0.97)</b> | 0.72<br>(0.50-1.03)               | <b>0.76</b><br><b>(0.62-0.95)</b> | <b>0.61</b><br><b>(0.48-0.78)</b> | <b>1.13</b><br><b>(1.01-1.25)</b> | 0.84<br>(0.54-1.30)               |
| <b>Time in the US (&lt;15 years) (n=426)</b>   | <b>0.59</b><br><b>(0.40-0.88)</b> | <b>0.65</b><br><b>(0.51-0.82)</b> | 0.60<br>(0.29-1.24)               | 0.71<br>(0.50-1.01)               | <b>0.54</b><br><b>(0.34-0.85)</b> | 0.79<br>(0.57-1.11)               | 0.49<br>(0.18-1.29)               |
| <b>Time in the US (15+ years) (n=962)</b>      | 1.00<br>(0.84-1.20)               | 0.99<br>(0.89-1.10)               | 0.60<br>(0.35-1.04)               | 0.79<br>(0.59-1.04)               | <b>0.64</b><br><b>(0.49-0.84)</b> | <b>0.98</b><br><b>(0.84-1.15)</b> | 0.97<br>(0.62-1.51)               |
| <b>Central/South American</b>                  |                                   |                                   |                                   |                                   |                                   |                                   |                                   |
| <b>Overall (n=8,162)</b>                       | <b>0.78</b><br><b>(0.70-0.86)</b> | 0.96<br>(0.90-1.02)               | <b>0.73</b><br><b>(0.64-0.82)</b> | <b>0.76</b><br><b>(0.67-0.87)</b> | <b>0.65</b><br><b>(0.58-0.73)</b> | <b>1.09</b><br><b>(1.05-1.13)</b> | <b>0.42</b><br><b>(0.34-0.53)</b> |
| <b>US-born (yes)</b><br>(n=1,113)              | <b>1.29</b><br><b>(1.02-1.63)</b> | 1.15<br>(1.00-1.33)               | <b>0.74</b><br><b>(0.55-0.99)</b> | 1.21<br>(0.96-1.51)               | 0.98<br>(0.73-1.30)               | 0.99<br>(0.89-1.11)               | 0.64<br>(0.38-1.10)               |
| <b>US-born (no)</b><br>(n=7,049)               | <b>0.71</b><br><b>(0.64-0.79)</b> | <b>0.93</b><br><b>(0.87-0.98)</b> | <b>0.72</b><br><b>(0.64-0.82)</b> | <b>0.68</b><br><b>(0.59-0.77)</b> | <b>0.59</b><br><b>(0.53-0.67)</b> | <b>1.11</b><br><b>(1.07-1.16)</b> | <b>0.39</b><br><b>(0.30-0.50)</b> |
| <b>Time in the US (&lt;15 years) (n=3,032)</b> | <b>0.55</b><br><b>(0.46-0.67)</b> | <b>0.80</b><br><b>(0.73-0.87)</b> | 0.74<br>(0.53-1.03)               | <b>0.54</b><br><b>(0.42-0.69)</b> | <b>0.43</b><br><b>(0.34-0.55)</b> | <b>0.79</b><br><b>(0.70-0.89)</b> | <b>0.30</b><br><b>(0.16-0.58)</b> |
| <b>Time in the US (15+ years) (n=3,989)</b>    | <b>0.85</b><br><b>(0.74-0.96)</b> | 0.96<br>(0.91-1.02)               | <b>0.60</b><br><b>(0.47-0.78)</b> | <b>0.75</b><br><b>(0.64-0.87)</b> | <b>0.67</b><br><b>(0.58-0.77)</b> | <b>0.87</b><br><b>(0.80-0.95)</b> | <b>0.43</b><br><b>(0.33-0.55)</b> |

Abbreviations: ref (reference)

Adjusted for age (18-30, 31-49, 50-64, 65+ years), sex (male, female), annual household income (<\$35,000, \$35,000-\$74,999, \$75,000+), educational attainment (<high school, high school graduate, some college, ≥college), unemployed/not in the labor force (yes, no), occupational class (professional/management, support services, laborers), marital/cohabitating status (married/cohabitating, divorced/widowed, single), region of residence (Northeast, Midwest, South, West), alcohol consumption (never, former, current), serious psychological distress (Kessler-6 psychological distress scale)

score  $\geq 13$ ), “ideal” cardiovascular health (never smoking/quit  $>12$  months prior to interview, BMI  $<25$  kg/m<sup>2</sup>, meeting physical activity guidelines, and no prior diagnosis of dyslipidemia, hypertension, or diabetes/prediabetes), and cancer.

Note. All estimates are weighted for the survey’s complex sampling design. Trouble falling asleep, trouble staying asleep, nonrestorative sleep, and sleep medication were measured during the survey years 2013-2017.
